# Supplementary material for: The role of glycosyltransferase enzyme GCNT3 in colon and ovarian cancer prognosis and chemoresistance
Source: PubMed Central journal article supplement (PMC5981315; doi:10.1038/s41598-018-26468-4), 2018-05-31
Supplement: 41598_2018_26468_MOESM1_ESM.pdf [file 41598_2018_26468_MOESM1_ESM.pdf]

## **SUPPLEMENTARY INFORMATION**

### **The role of glycosyltransferase enzyme GCNT3 in colon and ovarian cancer prognosis and chemoresistance**

Lara P. Fernández<sup>1</sup>, Ruth Sánchez-Martínez<sup>1</sup>, Teodoro Vargas<sup>1</sup>, Jesús Herranz<sup>2</sup>, Roberto Martín-Hernández<sup>2</sup>, Marta Mendiola<sup>3,4</sup>, David Hardisson<sup>4,5</sup>, Guillermo Reglero<sup>1</sup>, Jaime Feliu<sup>6,7,8,9</sup>, Andrés Redondo<sup>6,7,9</sup> and Ana Ramírez de Molina<sup>1</sup>

**Authors's Affiliations:** <sup>1</sup>Molecular Oncology Group, IMDEA Food Institute, CEI UAM + CSIC, Madrid, Spain; <sup>2</sup>Biostatistics and Bioinformatics Unit, IMDEA-Food Institute, CEI UAM+CSIC, Madrid; <sup>3</sup>Molecular Pathology Section, Institute of Medical and Molecular Genetics (INGEMM) La Paz University Hospital, Madrid, Spain; <sup>4</sup>Molecular Pathology and Therapeutic Targets Lab, IdiPAZ, La Paz University Hospital, Madrid (Spain); <sup>5</sup>Pathology Department, IdiPAZ, La Paz University Hospital, Madrid (Spain); <sup>6</sup>Translational Oncology Lab, IdiPAZ, La Paz University Hospital, Madrid (Spain); <sup>7</sup>Clinical Oncology Department, La Paz University Hospital, Madrid (Spain); <sup>8</sup>CIBERONC CB16/12/00398, La Paz University Hospital, Madrid (Spain); <sup>9</sup>Catedra UAM-AMGEN, La Paz University Hospital, Madrid (Spain).

**Contact Information (Corresponding Author):** Ana Ramírez de Molina, Molecular Oncology Group, IMDEA Food Institute, CEI UAM + CSIC. Carretera de Cantoblanco 8, Madrid, Spain. Phone +34672134921. E-mail: [ana.ramirez@imdea.org](mailto:ana.ramirez@imdea.org)

**Running Title:** GCNT3 in Colon and Ovarian cancer: Prognosis and Resistance

## LIST OF SUPPLEMENTARY MATERIAL

Supplementary Figure 1. Regulation of VEGFA protein expression after GCNT3 overexpression.

Supplementary Figure 2. Full-length blots/gels of Figure 1 (Panel A).

Supplementary Figure 3. Full-length blots/gels of Figure 4 (Panel A).

Supplementary Figure 4. Full-length blots/gels of Figure 6 (Panel E).

Supplementary Figure 5. Full-length blots/gels of Supplementary Figure1 (Panel A).

Supplementary Table 1. Oligos used for mRNA expression assays.

Supplementary Table 2. Clinical characteristics of epithelial ovarian cancer patients

Supplementary Table 3. Genomic analysis. List of 152 differentially deregulated probes.

Supplementary Table 4. Gene ontology (GO) terms obtained from transcriptomic study of GCNT3.

Supplementary Table 5. Proteomic analysis. List of 135 statistically significant GCNT3 interactors.

Supplementary Table 6. Gene ontology (GO) terms obtained from proteomic study of GCNT3 interactors.

### Supplementary Figure 1. Regulation of VEGFA protein expression after GCNT3 overexpression.

Panel A) Protein expression levels of VEGFA in stable cell lines overexpressing GCNT3 and shGCNT3. Proteins were detected by western blot using specific antibodies against VEGFA and  $\beta$ -Actin as a loading control. Representative western blot assays of three independent experiments are shown. Full-length blots/gels are presented in Supplementary Fig 5.

Panel B) Protein levels were quantified relative to controls (NoORF or Scramble) by densitometry using Image J.

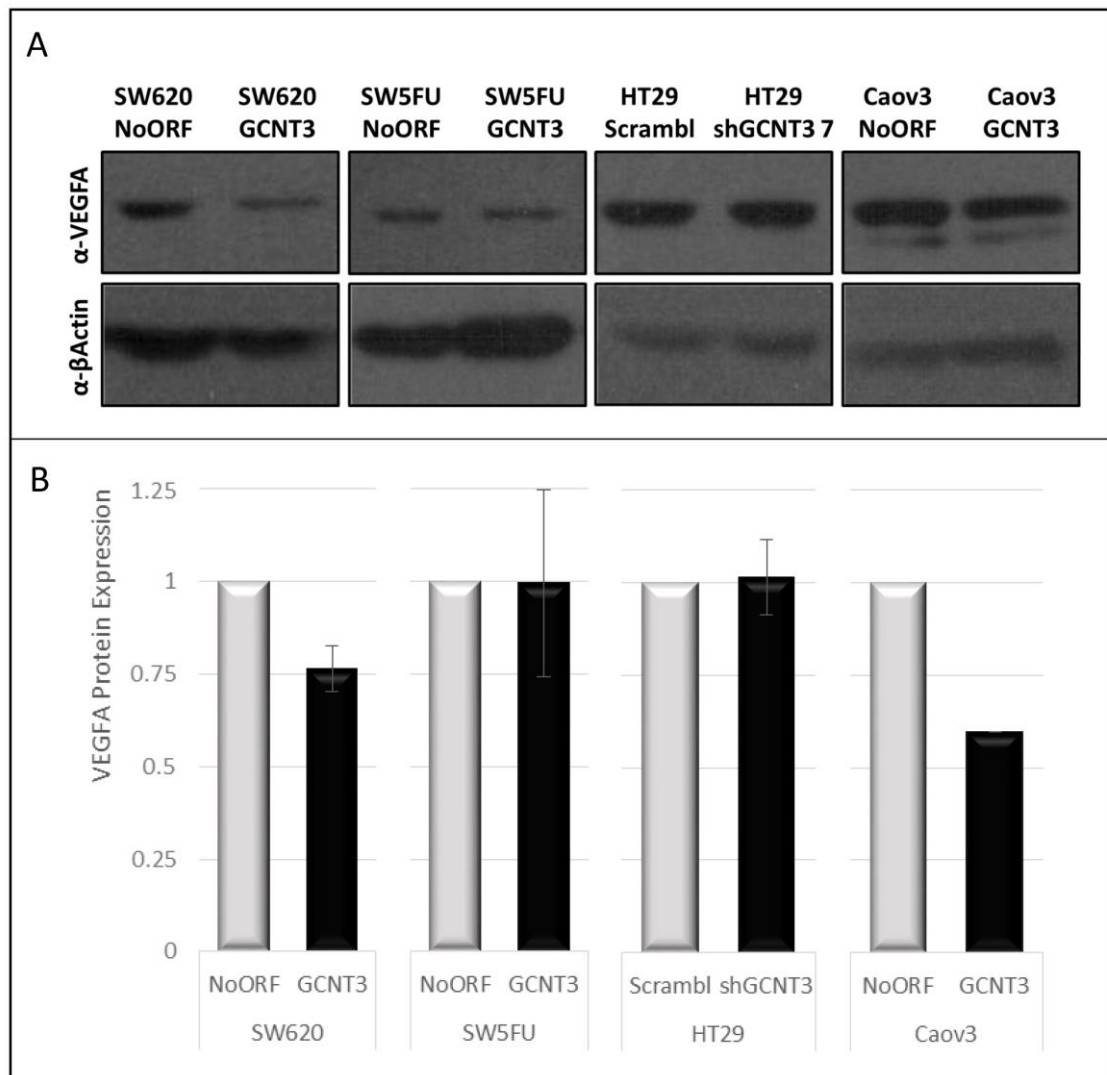

Supplementary Figure 2. Full-length blots/gels of Figure 1 (Panel A).

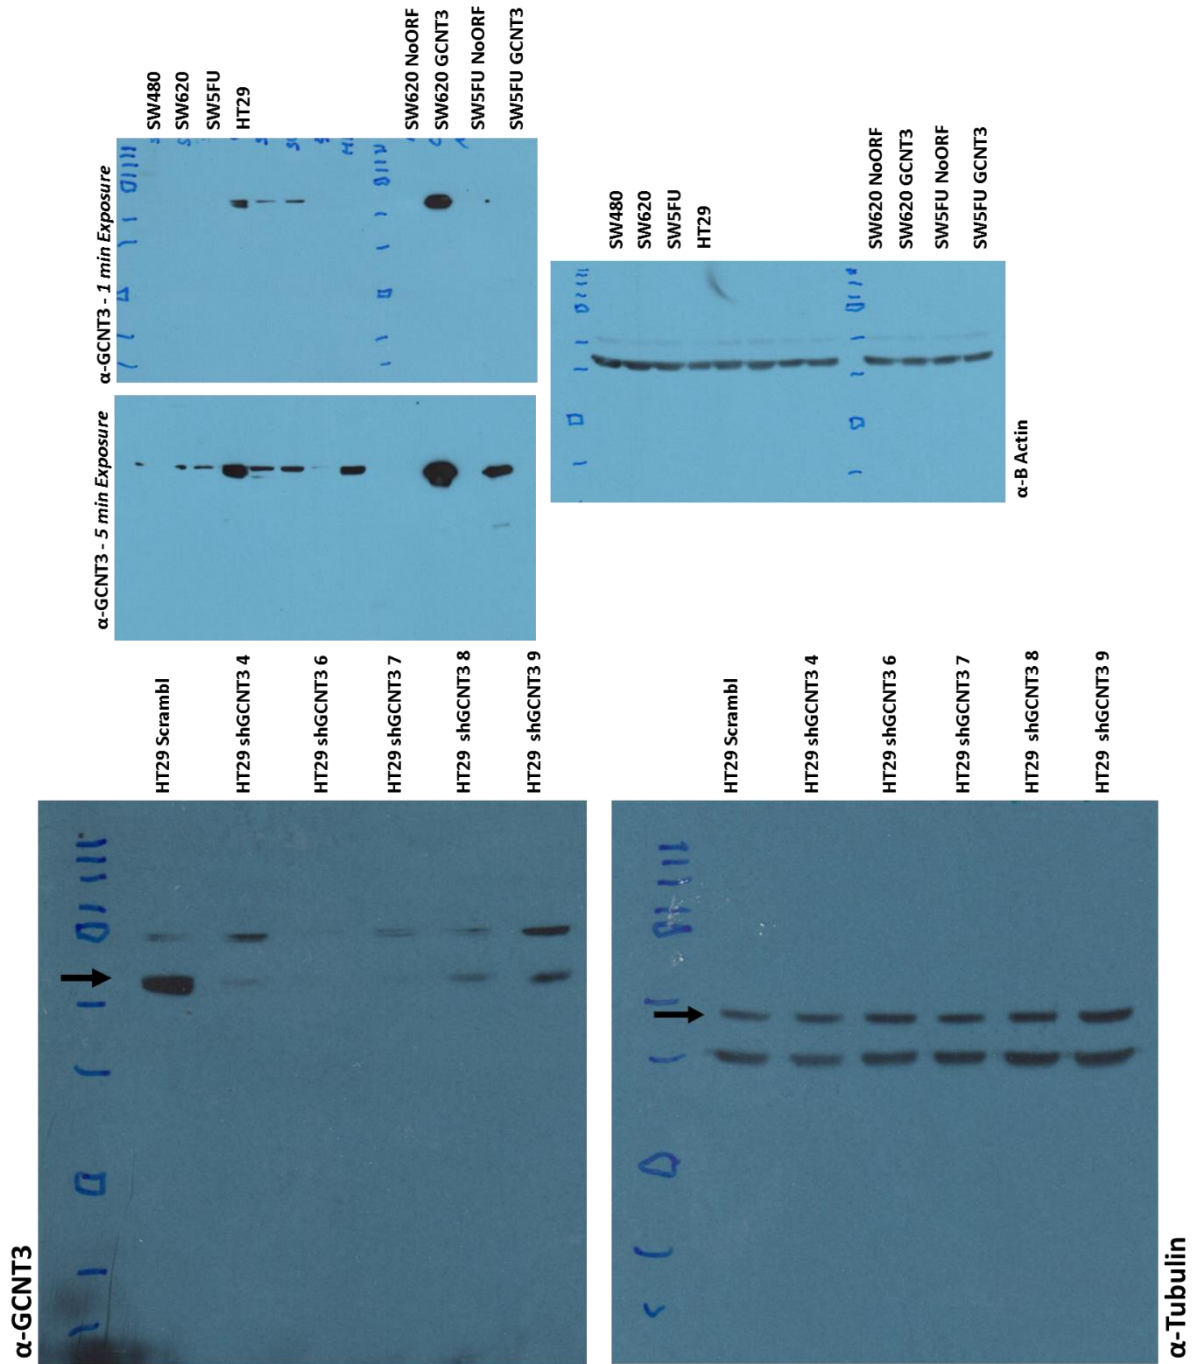

**Supplementary Figure 3. Full-length blots/gels of Figure 4 (Panel A).**

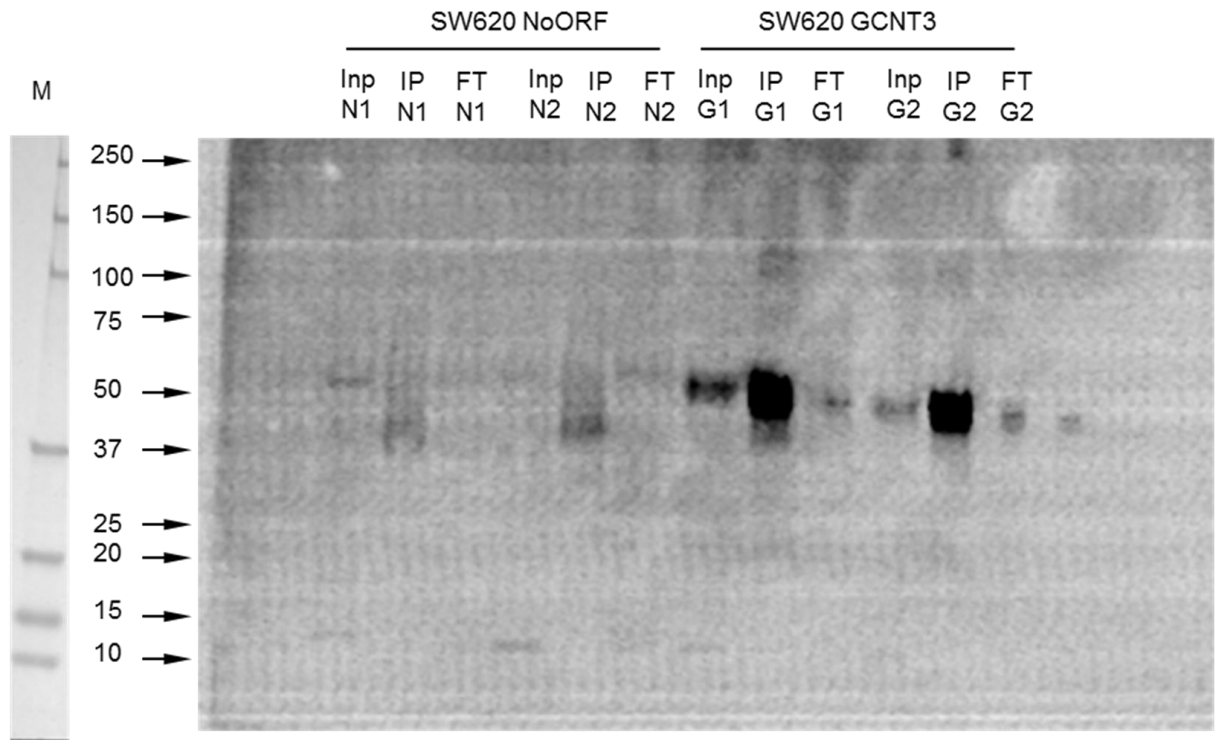

**Anti GCNT3 Sigma (Rabbit)**

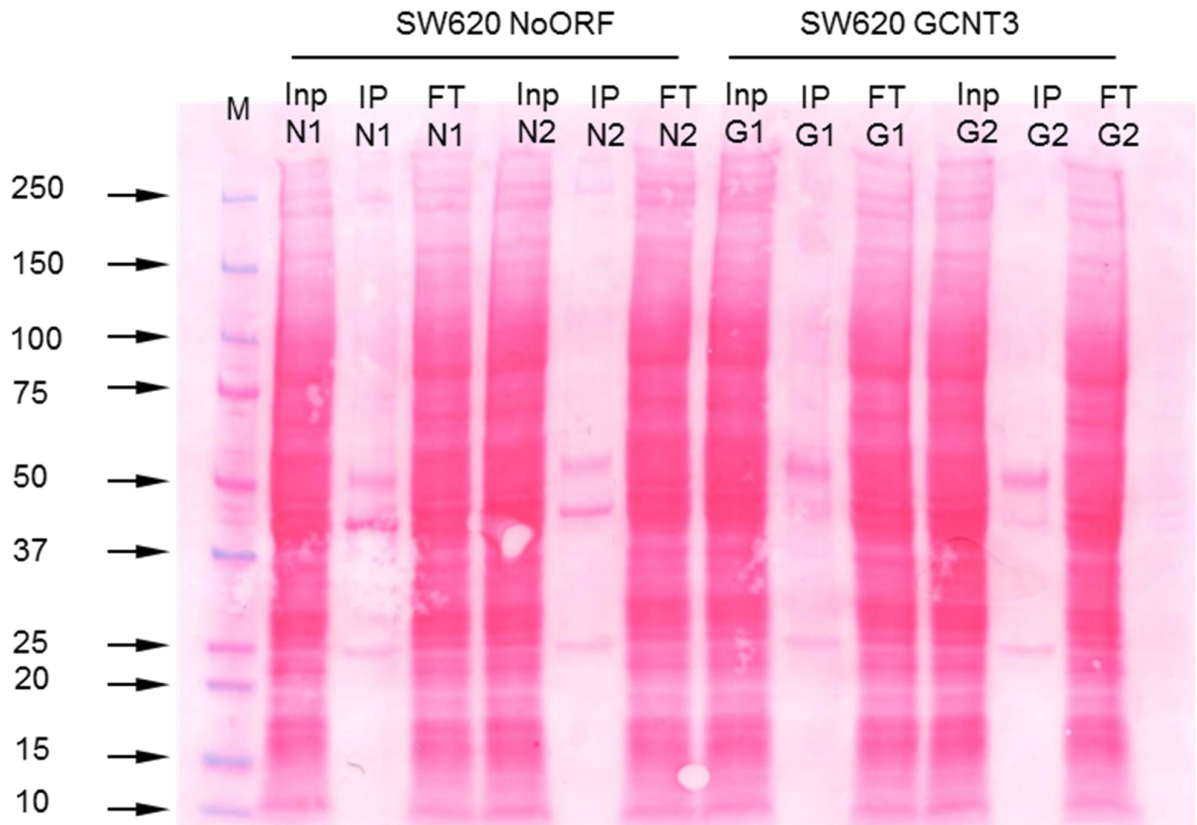

Supplementary Figure 5. Full-length blots/gels of Supplementary Figure 1 (Panel A).

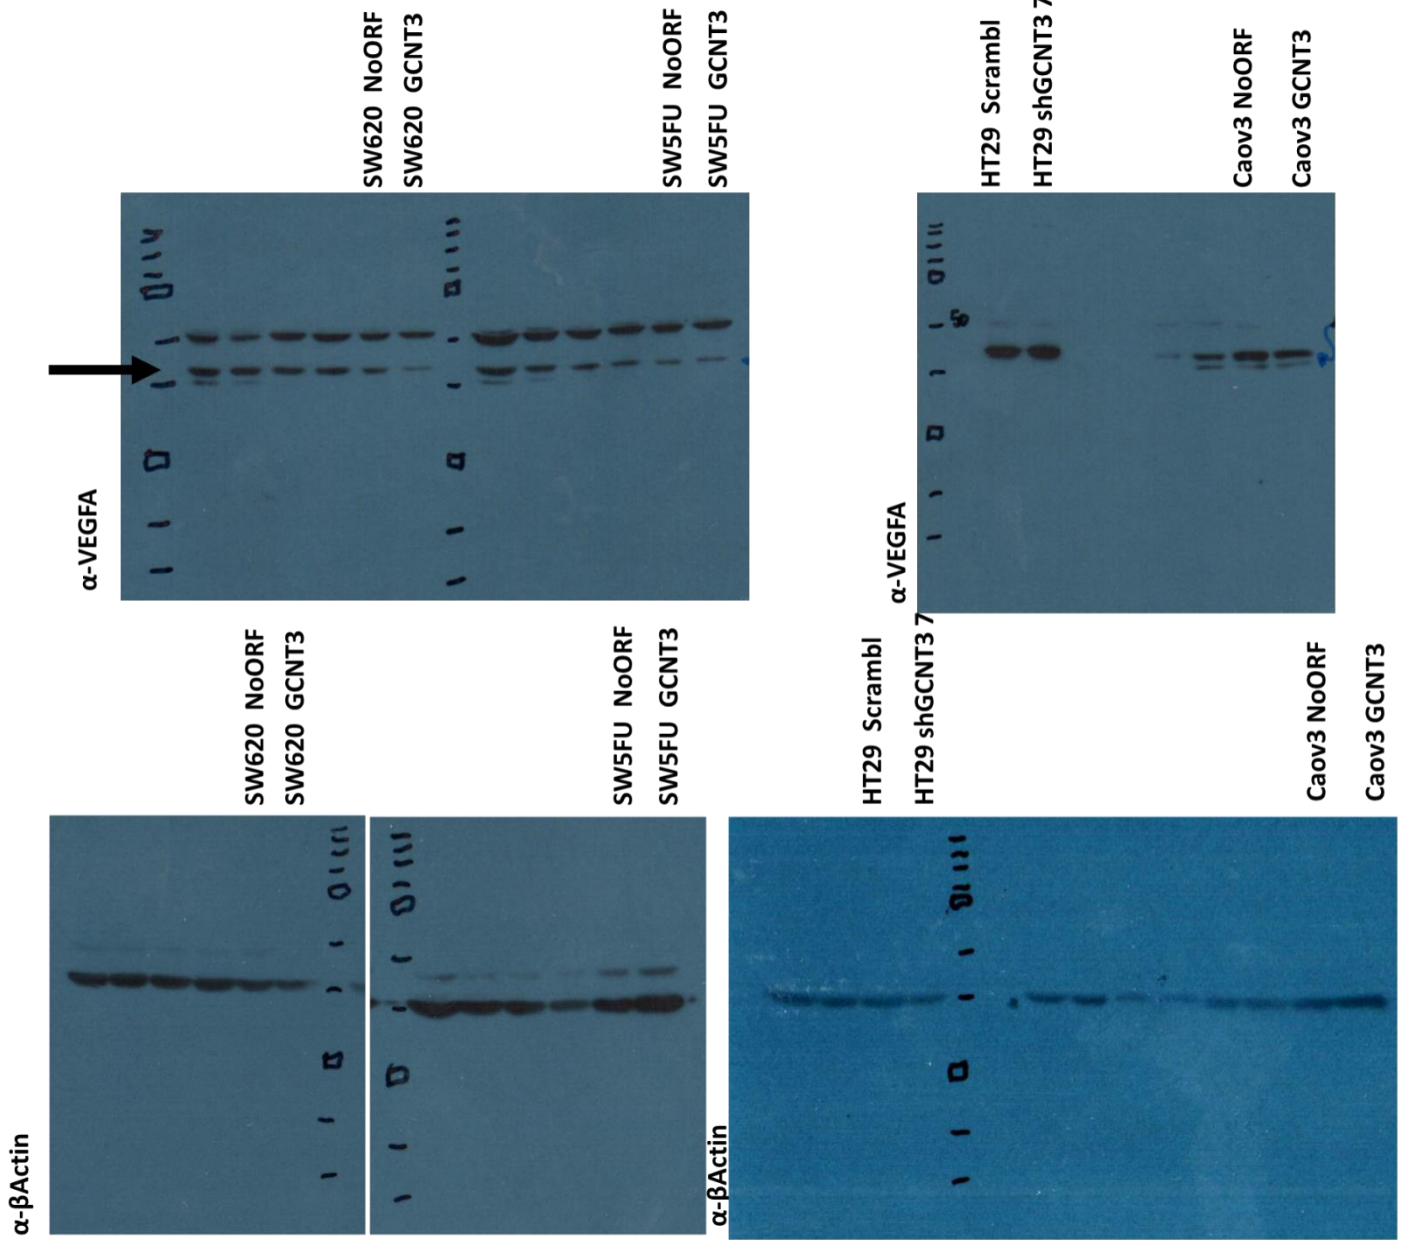

**Supplementary Table 1. Oligos used for mRNA expression assays.**

| Gene            | Orientation | Sequence (5'->3')        |
|-----------------|-------------|--------------------------|
| <b>AKAP12</b>   | Forward     | CTCCTGCCTTGGGAGTTTGC     |
|                 | Reverse     | GGCCATTTAGGTCACCCTCC     |
| <b>ANKRD11</b>  | Forward     | ACACGGGATTTGTCGGTGAA     |
|                 | Reverse     | GGGTGCTTTGGTGTGTGTC      |
| <b>ATR</b>      | Forward     | GAGTTTTGGCCTCCACACGG     |
|                 | Reverse     | AAGTGCTAGCTGGTTGTGCT     |
| <b>AURKB</b>    | Forward     | CGATCATGGAGGAGTTGGCA     |
|                 | Reverse     | GGGGTTATGCCTGAGCAGTT     |
| <b>CANX</b>     | Forward     | CCGGGAGGCTAGAGATCATGG    |
|                 | Reverse     | CAGGGGCATCTTCATCCAG      |
| <b>CASP9</b>    | Forward     | CAGGCCCATATGATCGAGG      |
|                 | Reverse     | TCGACAACTTTGCTGCTTGC     |
| <b>DDIT4</b>    | Forward     | CTGTCCTACCATGCCTAGC      |
|                 | Reverse     | ATCCAGGTAAGCCGTGTCTTC    |
| <b>EGR1</b>     | Forward     | TGACCCGTTCCGATCCTTTC     |
|                 | Reverse     | GAGTGGTTGGCTGGGGTAA      |
| <b>FOS</b>      | Forward     | CAGACTACGAGGCGTCATCC     |
|                 | Reverse     | AGTTGGTCTGTCTCCGCTTG     |
| <b>GAPDH</b>    | Forward     | TGGTATCGTGAAGGACTCATGAC  |
|                 | Reverse     | ATGCCAGTGAGCTTCCCCTTCAGC |
| <b>GCNT3</b>    | Forward     | CACCAGAGACTGTGAGCACTTC   |
|                 | Reverse     | CATACACAGCTCGCAGTAGCC T  |
| <b>IGF2BP3</b>  | Forward     | ACTGCACGGGAAACCCATAG     |
|                 | Reverse     | CCAGCACCTCCCACTGTAAT     |
| <b>IL10</b>     | Forward     | TACGGCGCTGTCATCGATT      |
|                 | Reverse     | AAGGTTTCTCAAGGGCTGG      |
| <b>MSH2</b>     | Forward     | GGAGGTGAGGAGTTTCGAC      |
|                 | Reverse     | TTAAGGGCTCTGACTGCTGC     |
| <b>PAM</b>      | Forward     | TATCCGGTGGTTGTCTGTC      |
|                 | Reverse     | CGTCTCGAGTTGTGTTTCTG     |
| <b>PCNA</b>     | Forward     | GCCAGAGCTCTCCCTTACG      |
|                 | Reverse     | TAGCTGGTTTCGGCTTCAGG     |
| <b>PPARG</b>    | Forward     | AGTCGTGGTACTTTACGCC      |
|                 | Reverse     | TCGTTAAAGGCTGACTCTCGT    |
| <b>PTEN</b>     | Forward     | CGCCTCCTCTTCGTCTTTTCTA   |
|                 | Reverse     | GCTGTGGTGGGTTATGGTCTT    |
| <b>RASD1</b>    | Forward     | CCCTCTGCCAATGAAACT       |
|                 | Reverse     | TGAAAACGTCTCTGTGAGG      |
| <b>SERPINI1</b> | Forward     | GGAAACCGGTGCAAAACCTC     |
|                 | Reverse     | AGGCCTAAACTGCGACTTCC     |
| <b>VEGF</b>     | Forward     | TTTCGTCCAATTCTGGGCT      |
|                 | Reverse     | CGGCTTGTACATTTTCTTGT     |
| <b>XRCC4</b>    | Forward     | AGCGGGCGTTTTGGAAGATA     |
|                 | Reverse     | GGCTTTTCTTTTCTTGAAGCTG   |

**Supplementary Table 2. Clinical characteristics of epithelial ovarian cancer patients**

| <b>Characteristics</b>              | <b>N(%)</b> |
|-------------------------------------|-------------|
| <b>Patients</b>                     | 56          |
| <b>Median Age (Range)</b>           | 56 (35-85)  |
| <b>Stage</b>                        |             |
| IIIA                                | 7 (12.5)    |
| IIIB                                | 9 (16.1)    |
| IIIC                                | 32 (57.1)   |
| IV                                  | 8 (14.3)    |
| <b>Histology</b>                    |             |
| Serous                              | 51 (91.1)   |
| Endometrioid                        | 2 (3.6)     |
| Other                               | 3 (5.4)     |
| <b>Grade</b>                        |             |
| 1                                   | 1 (1.8)     |
| 2                                   | 20 (35.7)   |
| 3                                   | 35 (62.5)   |
| <b>Surgical Outcome (Stage III)</b> |             |
| Optimal (<1cm)                      | 13 (23.2)   |
| Sub-optimal (≥1cm)                  | 21 (37.5)   |
| <b>Response to Initial Therapy</b>  |             |
| Complete Response                   | 38 (67.9)   |
| Partial Response                    | 11 (19.6)   |
| Progression Disease                 | 4 (7.1)     |
| Stable Disease                      | 3 (5.4)     |
| <b>Recurrences</b>                  | 48 (85.7)   |
| <b>Deaths</b>                       | 36 (64.3)   |
| <b>Survival (months)</b>            |             |
| Median DFS (Range)                  | 16 (1-127)  |
| Median OS (Range)                   | 35 (2-127)  |



**Supplementary Table 3. Genomic analysis. List of 152 differentially deregulated probes.**

| Fold Change | pval (LiMMA) | FDR (LiMMA) | ProbeID         | Systematic Name | Description                                                                                                                             |
|-------------|--------------|-------------|-----------------|-----------------|-----------------------------------------------------------------------------------------------------------------------------------------|
| -2.71       | 0.00025      | 0.066       | <b>ADAMTS7</b>  | NM_014272       | ref Homo sapiens ADAM metalloproteinase with thrombospondin type 1 motif, 7 (ADAMTS7), mRNA [NM_014272]                                 |
| -2.06       | 0.00025      | 0.066       | <b>AK123993</b> | AK123993        | gb Homo sapiens cDNA FLJ41999 fis, clone SPLEN2029683. [AK123993]                                                                       |
| -1.90       | 0.00053      | 0.073       | <b>AK124190</b> | AK124190        | gb Homo sapiens cDNA FLJ42196 fis, clone THYMU2033816. [AK124190]                                                                       |
| 2.05        | 0.00010      | 0.055       | <b>AKAP12</b>   | NM_005100       | ref Homo sapiens A kinase (PRKA) anchor protein 12 (AKAP12), transcript variant 1, mRNA [NM_005100]                                     |
| 1.66        | 0.00023      | 0.063       | <b>AMACR</b>    | NM_001167595    | ref Homo sapiens alpha-methylacyl-CoA racemase (AMACR), transcript variant 3, mRNA [NM_001167595]                                       |
| -2.08       | 0.00011      | 0.055       | <b>ANKRD11</b>  | NM_001256182    | ref Homo sapiens ankyrin repeat domain 11 (ANKRD11), transcript variant 1, mRNA [NM_001256182]                                          |
| 1.60        | 0.00006      | 0.055       | <b>APOBEC3B</b> | NM_004900       | ref Homo sapiens apolipoprotein B mRNA editing enzyme, catalytic polypeptide-like 3B (APOBEC3B), transcript variant 1, mRNA [NM_004900] |
| -1.88       | 0.00005      | 0.055       | <b>APPL1</b>    | NM_012096       | ref Homo sapiens adaptor protein, phosphotyrosine interaction, PH domain and leucine zipper containing 1 (APPL1), mRNA [NM_012096]      |
| -1.72       | 0.00012      | 0.055       | <b>ATP8</b>     | ENST00000361851 | ens mitochondrially encoded ATP synthase 8 [Source:HGNC Symbol;Acc:HGNC:7415] [ENST00000361851]                                         |
| 1.78        | 0.00003      | 0.055       | <b>AURKB</b>    | NM_004217       | ref Homo sapiens aurora kinase B (AURKB), transcript variant 1, mRNA [NM_004217]                                                        |
| -1.87       | 0.00013      | 0.055       | <b>BACE1</b>    | NM_012104       | ref Homo sapiens beta-site APP-cleaving enzyme 1 (BACE1), transcript variant a, mRNA [NM_012104]                                        |
| -1.57       | 0.00008      | 0.055       | <b>C12orf65</b> | NM_152269       | ref Homo sapiens chromosome 12 open reading frame 65 (C12orf65), transcript variant 1, mRNA [NM_152269]                                 |
| -1.66       | 0.00068      | 0.076       | <b>C6orf89</b>  | NM_152734       | ref Homo sapiens chromosome 6 open reading frame 89 (C6orf89), transcript variant 1, mRNA [NM_152734]                                   |
| -1.54       | 0.00007      | 0.055       | <b>CAMSAP2</b>  | NM_001297707    | ref Homo sapiens calmodulin regulated spectrin-associated protein family, member 2 (CAMSAP2), transcript variant 1, mRNA [NM_001297707] |
| 1.54        | 0.00015      | 0.058       | <b>CDCA2</b>    | NM_152562       | ref Homo sapiens cell division cycle associated 2 (CDCA2), mRNA [NM_152562]                                                             |
| -2.03       | 0.00004      | 0.055       | <b>CDK11B</b>   | NM_033487       | ref Homo sapiens cyclin-dependent kinase 11                                                                                             |
| -1.79       | 0.00079      | 0.077       | <b>CELF1</b>    | NM_198700       | ref Homo sapiens CUGBP, Elav-like family member 1 (CELF1), transcript variant 2, mRNA [NM_198700]                                       |
| -1.53       | 0.00058      | 0.074       | <b>CENPP</b>    | NM_001012267    | ref Homo sapiens centromere protein P (CENPP), transcript variant 1, mRNA [NM_001012267]                                                |
| -2.25       | 0.00009      | 0.055       | <b>CHAC1</b>    | NM_024111       | ref Homo sapiens ChaC glutathione-specific gamma-glutamylcyclotransferase 1 (CHAC1), transcript variant 1, mRNA [NM_024111]             |
| 1.54        | 0.00026      | 0.066       | <b>CHGB</b>     | NM_001819       | ref Homo sapiens chromogranin B (secretogranin 1) (CHGB), mRNA [NM_001819]                                                              |
| -1.80       | 0.00014      | 0.055       | <b>CTNNAL1</b>  | NM_003798       | ref Homo sapiens catenin (cadherin-associated protein), alpha-like 1 (CTNNAL1), transcript variant 1, mRNA [NM_003798]                  |
| -1.58       | 0.00070      | 0.076       | <b>CXXC5</b>    | NM_016463       | ref Homo sapiens CXXC finger protein 5 (CXXC5), mRNA [NM_016463]                                                                        |
| -1.55       | 0.00017      | 0.059       | <b>CYGB</b>     | NM_134268       | ref Homo sapiens cytoglobin (CYGB), mRNA [NM_134268]                                                                                    |
| 1.53        | 0.00009      | 0.055       | <b>CYTL1</b>    | NM_018659       | ref Homo sapiens cytokine-like 1 (CYTL1), mRNA [NM_018659]                                                                              |
| 1.53        | 0.00011      | 0.055       | <b>CYTL1</b>    | NM_018659       | ref Homo sapiens cytokine-like 1 (CYTL1), mRNA [NM_018659]                                                                              |
| 1.56        | 0.00009      | 0.055       | <b>CYTL1</b>    | NM_018659       | ref Homo sapiens cytokine-like 1 (CYTL1), mRNA [NM_018659]                                                                              |
| 1.57        | 0.00006      | 0.055       | <b>CYTL1</b>    | NM_018659       | ref Homo sapiens cytokine-like 1 (CYTL1), mRNA [NM_018659]                                                                              |
| 1.59        | 0.00011      | 0.055       | <b>CYTL1</b>    | NM_018659       | ref Homo sapiens cytokine-like 1 (CYTL1), mRNA [NM_018659]                                                                              |
| 1.57        | 0.00016      | 0.059       | <b>CYTL1</b>    | NM_018659       | ref Homo sapiens cytokine-like 1 (CYTL1), mRNA [NM_018659]                                                                              |
| 1.51        | 0.00018      | 0.060       | <b>CYTL1</b>    | NM_018659       | ref Homo sapiens cytokine-like 1 (CYTL1), mRNA [NM_018659]                                                                              |
| 1.53        | 0.00045      | 0.073       | <b>CYTL1</b>    | NM_018659       | ref Homo sapiens cytokine-like 1 (CYTL1), mRNA [NM_018659]                                                                              |
| -1.72       | 0.00014      | 0.055       | <b>DDIT4</b>    | NM_019058       | ref Homo sapiens DNA-damage-inducible transcript 4 (DDIT4), mRNA [NM_019058]                                                            |
| -1.73       | 0.00013      | 0.055       | <b>DDIT4</b>    | NM_019058       | ref Homo sapiens DNA-damage-inducible transcript 4 (DDIT4), mRNA [NM_019058]                                                            |
| -1.73       | 0.00014      | 0.057       | <b>DDIT4</b>    | NM_019058       | ref Homo sapiens DNA-damage-inducible transcript 4 (DDIT4), mRNA [NM_019058]                                                            |

**SUPPLEMENTARY INFORMATION: The role of glycosyltransferase enzyme GCNT3 in colon and ovarian cancer prognosis and chemoresistance**

|       |         |       |                        |                 |                                                                                                                          |
|-------|---------|-------|------------------------|-----------------|--------------------------------------------------------------------------------------------------------------------------|
| -1.72 | 0.00016 | 0.059 | <b>DDIT4</b>           | NM_019058       | ref Homo sapiens DNA-damage-inducible transcript 4 (DDIT4), mRNA [NM_019058]                                             |
| -1.73 | 0.00021 | 0.061 | <b>DDIT4</b>           | NM_019058       | ref Homo sapiens DNA-damage-inducible transcript 4 (DDIT4), mRNA [NM_019058]                                             |
| -1.73 | 0.00027 | 0.067 | <b>DDIT4</b>           | NM_019058       | ref Homo sapiens DNA-damage-inducible transcript 4 (DDIT4), mRNA [NM_019058]                                             |
| -1.77 | 0.00041 | 0.073 | <b>DDIT4</b>           | NM_019058       | ref Homo sapiens DNA-damage-inducible transcript 4 (DDIT4), mRNA [NM_019058]                                             |
| -1.67 | 0.00076 | 0.077 | <b>DDIT4</b>           | NM_019058       | ref Homo sapiens DNA-damage-inducible transcript 4 (DDIT4), mRNA [NM_019058]                                             |
| -1.67 | 0.00087 | 0.079 | <b>DDR GK1</b>         | ENST00000380201 | ens DDR GK domain containing 1 [Source:HGNC Symbol;Acc:HGNC:16110] [ENST00000380201]                                     |
| -1.69 | 0.00004 | 0.055 | <b>DDX17</b>           | NM_006386       | ref Homo sapiens DEAD (Asp-Glu-Ala-Asp) box helicase 17 (DDX17), transcript variant 1, mRNA [NM_006386]                  |
| 1.65  | 0.00019 | 0.060 | <b>DKK1</b>            | NM_012242       | ref Homo sapiens dickkopf WNT signaling pathway inhibitor 1 (DKK1), mRNA [NM_012242]                                     |
| -1.61 | 0.00040 | 0.073 | <b>DRD5</b>            | NM_000798       | ref Homo sapiens dopamine receptor D5 (DRD5), mRNA [NM_000798]                                                           |
| -1.95 | 0.00001 | 0.055 | <b>EBLN3</b>           | NR_036592       | ref Homo sapiens endogenous Bornavirus-like nucleoprotein 3 (EBLN3), non-coding RNA [NR_036592]                          |
| -1.79 | 0.00032 | 0.068 | <b>EHF</b>             | NM_012153       | ref Homo sapiens ets homologous factor (EHF), transcript variant 2, mRNA [NM_012153]                                     |
| -1.68 | 0.00079 | 0.077 | <b>EML4</b>            | ENST00000409040 | ens echinoderm microtubule associated protein like 4 [Source:HGNC Symbol;Acc:HGNC:1316] [ENST00000409040]                |
| -2.28 | 0.00050 | 0.073 | <b>ENST00000414130</b> | ENST00000414130 | ens high mobility group AT-hook 1 pseudogene 8 (functional) [Source:HGNC Symbol;Acc:HGNC:39183] [ENST00000414130]        |
| -1.92 | 0.00001 | 0.055 | <b>EPS8</b>            | NM_004447       | ref Homo sapiens epidermal growth factor receptor pathway substrate 8 (EPS8), mRNA [NM_004447]                           |
| 1.69  | 0.00022 | 0.062 | <b>FAM46C</b>          | NM_017709       | ref Homo sapiens family with sequence similarity 46, member C (FAM46C), mRNA [NM_017709]                                 |
| -2.00 | 0.00006 | 0.055 | <b>FBRSL1</b>          | NM_001142641    | ref Homo sapiens fibrosin-like 1 (FBRSL1), mRNA [NM_001142641]                                                           |
| 2.14  | 0.00001 | 0.055 | <b>FOS</b>             | NM_005252       | ref Homo sapiens FBJ murine osteosarcoma viral oncogene homolog (FOS), mRNA [NM_005252]                                  |
| -1.52 | 0.00004 | 0.055 | <b>FUT1</b>            | NM_000148       | ref Homo sapiens fucosyltransferase 1 (galactoside 2-alpha-L-fucosyltransferase, H blood group) (FUT1), mRNA [NM_000148] |
| -1.56 | 0.00008 | 0.055 | <b>FUT1</b>            | NM_000148       | ref Homo sapiens fucosyltransferase 1 (galactoside 2-alpha-L-fucosyltransferase, H blood group) (FUT1), mRNA [NM_000148] |
| -1.54 | 0.00031 | 0.068 | <b>FUT1</b>            | NM_000148       | ref Homo sapiens fucosyltransferase 1 (galactoside 2-alpha-L-fucosyltransferase, H blood group) (FUT1), mRNA [NM_000148] |
| -1.52 | 0.00034 | 0.070 | <b>FUT1</b>            | NM_000148       | ref Homo sapiens fucosyltransferase 1 (galactoside 2-alpha-L-fucosyltransferase, H blood group) (FUT1), mRNA [NM_000148] |
| -1.51 | 0.00053 | 0.073 | <b>FUT1</b>            | NM_000148       | ref Homo sapiens fucosyltransferase 1 (galactoside 2-alpha-L-fucosyltransferase, H blood group) (FUT1), mRNA [NM_000148] |
| -1.53 | 0.00047 | 0.073 | <b>FUT1</b>            | NM_000148       | ref Homo sapiens fucosyltransferase 1 (galactoside 2-alpha-L-fucosyltransferase, H blood group) (FUT1), mRNA [NM_000148] |
| -1.61 | 0.00080 | 0.077 | <b>FUT1</b>            | NM_000148       | ref Homo sapiens fucosyltransferase 1 (galactoside 2-alpha-L-fucosyltransferase, H blood group) (FUT1), mRNA [NM_000148] |
| -1.54 | 0.00082 | 0.078 | <b>FUT1</b>            | NM_000148       | ref Homo sapiens fucosyltransferase 1 (galactoside 2-alpha-L-fucosyltransferase, H blood group) (FUT1), mRNA [NM_000148] |
| -1.78 | 0.00008 | 0.055 | <b>G0S2</b>            | NM_015714       | ref Homo sapiens G0/G1 switch 2 (G0S2), mRNA [NM_015714]                                                                 |
| -1.63 | 0.00017 | 0.059 | <b>GOLGA6L4</b>        | NM_001267536    | ref Homo sapiens golgin A6 family-like 4 (GOLGA6L4), mRNA [NM_001267536]                                                 |
| -1.62 | 0.00009 | 0.055 | <b>HIST1H1E</b>        | NM_005321       | ref Homo sapiens histone cluster 1, H1e (HIST1H1E), mRNA [NM_005321]                                                     |
| -1.81 | 0.00066 | 0.075 | <b>HIST1H2AH</b>       | NM_080596       | ref Homo sapiens histone cluster 1, H2ah (HIST1H2AH), mRNA [NM_080596]                                                   |
| -1.56 | 0.00003 | 0.055 | <b>HIST1H2AJ</b>       | NM_021066       | ref Homo sapiens histone cluster 1, H2aj (HIST1H2AJ), mRNA [NM_021066]                                                   |
| -1.70 | 0.00002 | 0.055 | <b>HIST1H2AK</b>       | NM_003510       | ref Homo sapiens histone cluster 1, H2ak (HIST1H2AK), mRNA [NM_003510]                                                   |
| -1.58 | 0.00005 | 0.055 | <b>HIST1H2AM</b>       | NM_003514       | ref Homo sapiens histone cluster 1, H2am (HIST1H2AM), mRNA [NM_003514]                                                   |
| -1.70 | 0.00053 | 0.073 | <b>HIST1H3B</b>        | NM_003537       | ref Homo sapiens histone cluster 1, H3b (HIST1H3B), mRNA [NM_003537]                                                     |
| -1.80 | 0.00011 | 0.055 | <b>HIST1H3F</b>        | NM_021018       | ref Homo sapiens histone cluster 1, H3f (HIST1H3F), mRNA [NM_021018]                                                     |
| -1.62 | 0.00011 | 0.055 | <b>HIST1H3H</b>        | NM_003536       | ref Homo sapiens histone cluster 1, H3h (HIST1H3H), mRNA [NM_003536]                                                     |
| -1.55 | 0.00027 | 0.067 | <b>HIST1H4A</b>        | NM_003538       | ref Homo sapiens histone cluster 1, H4a (HIST1H4A), mRNA [NM_003538]                                                     |
| -1.67 | 0.00006 | 0.055 | <b>HIST1H4D</b>        | NM_003539       | ref Homo sapiens histone cluster 1, H4d (HIST1H4D), mRNA [NM_003539]                                                     |
| -2.22 | 0.00052 | 0.073 | <b>HIST1H4D</b>        | NM_003539       | ref Homo sapiens histone cluster 1, H4d (HIST1H4D), mRNA [NM_003539]                                                     |
| -1.76 | 0.00010 | 0.055 | <b>HIST1H4E</b>        | NM_003545       | ref Homo sapiens histone cluster 1, H4e (HIST1H4E), mRNA [NM_003545]                                                     |
| -1.54 | 0.00029 | 0.068 | <b>HIST2H2AC</b>       | NM_003517       | ref Homo sapiens histone cluster 2, H2ac (HIST2H2AC), mRNA [NM_003517]                                                   |
| -1.55 | 0.00033 | 0.069 | <b>HIST2H4B</b>        | NM_001034077    | ref Homo sapiens histone cluster 2, H4b (HIST2H4B), mRNA [NM_001034077]                                                  |
| -1.62 | 0.00025 | 0.066 | <b>HP1BP3</b>          | NM_016287       | ref Homo sapiens heterochromatin protein 1, binding protein 3 (HP1BP3), mRNA [NM_016287]                                 |

**SUPPLEMENTARY INFORMATION: The role of glycosyltransferase enzyme GCNT3 in colon and ovarian cancer prognosis and chemoresistance**

|       |         |       |                    |                 |                                                                                                                                 |
|-------|---------|-------|--------------------|-----------------|---------------------------------------------------------------------------------------------------------------------------------|
| -1.59 | 0.00058 | 0.074 | <b>IGF2BP1</b>     | NM_006546       | ref Homo sapiens insulin-like growth factor 2 mRNA binding protein 1 (IGF2BP1), transcript variant 1, mRNA [NM_006546]          |
| -1.86 | 0.00003 | 0.055 | <b>IGF2BP3</b>     | NM_006547       | ref Homo sapiens insulin-like growth factor 2 mRNA binding protein 3 (IGF2BP3), mRNA [NM_006547]                                |
| -1.86 | 0.00005 | 0.055 | <b>KRTAP3-3</b>    | NM_033185       | ref Homo sapiens keratin associated protein 3-3 (KRTAP3-3), mRNA [NM_033185]                                                    |
| -1.79 | 0.00009 | 0.055 | <b>LARS</b>        | NM_020117       | ref Homo sapiens leucyl-tRNA synthetase (LARS), mRNA [NM_020117]                                                                |
| -2.31 | 0.00051 | 0.073 | <b>LINC01001</b>   | NR_028326       | ref Homo sapiens long intergenic non-protein coding RNA 1001 (LINC01001), long non-coding RNA [NR_028326]                       |
| -1.71 | 0.00002 | 0.055 | <b>LOC285178</b>   | AK091571        | gb Homo sapiens cDNA FLJ34252 fis, clone FCBBF5000061. [AK091571]                                                               |
| 1.58  | 0.00007 | 0.055 | <b>LRRC42</b>      | NM_052940       | ref Homo sapiens leucine rich repeat containing 42 (LRRC42), transcript variant 2, mRNA [NM_052940]                             |
| -1.81 | 0.00017 | 0.059 | <b>MIR4435-1HG</b> | NR_015395       | ref Homo sapiens MIR4435-1 host gene (non-protein coding) (MIR4435-1HG), transcript variant 1, long non-coding RNA [NR_015395]  |
| -1.72 | 0.00008 | 0.055 | <b>MYCBP2</b>      | NM_015057       | ref Homo sapiens MYC binding protein 2, E3 ubiquitin protein ligase (MYCBP2), mRNA [NM_015057]                                  |
| -1.62 | 0.00081 | 0.078 | <b>NBPF10</b>      | NM_001039703    | ref Homo sapiens neuroblastoma breakpoint family, member 10 (NBPF10), transcript variant 2, mRNA [NM_001039703]                 |
| -1.76 | 0.00001 | 0.055 | <b>NBPF9</b>       | CR936830        | gb Homo sapiens mRNA; cDNA DKFZp686H059 (from clone DKFZp686H059). [CR936830]                                                   |
| -2.17 | 0.00003 | 0.055 | <b>ND4L</b>        | ENST00000361335 | ens mitochondrially encoded NADH dehydrogenase 4L [Source:HGNC Symbol;Acc:HGNC:7460] [ENST00000361335]                          |
| -1.65 | 0.00003 | 0.055 | <b>ODF2L</b>       | NM_001007022    | ref Homo sapiens outer dense fiber of sperm tails 2-like (ODF2L), transcript variant 2, mRNA [NM_001007022]                     |
| 1.53  | 0.00014 | 0.055 | <b>PAM</b>         | NM_001177306    | ref Homo sapiens peptidylglycine alpha-amidating monooxygenase (PAM), transcript variant 5, mRNA [NM_001177306]                 |
| -1.91 | 0.00014 | 0.055 | <b>PGM5P2</b>      | NR_002836       | ref Homo sapiens phosphoglucomutase 5 pseudogene 2 (PGM5P2), non-coding RNA [NR_002836]                                         |
| -2.10 | 0.00005 | 0.055 | <b>PKD1</b>        | NM_000296       | ref Homo sapiens polycystic kidney disease 1 (autosomal dominant) (PKD1), transcript variant 2, mRNA [NM_000296]                |
| -1.54 | 0.00052 | 0.073 | <b>PNPLA3</b>      | NM_025225       | ref Homo sapiens patatin-like phospholipase domain containing 3 (PNPLA3), mRNA [NM_025225]                                      |
| 1.51  | 0.00043 | 0.073 | <b>POLR1C</b>      | NM_203290       | ref Homo sapiens polymerase (RNA) I polypeptide C, 30kDa (POLR1C), mRNA [NM_203290]                                             |
| -1.58 | 0.00004 | 0.055 | <b>PREPL</b>       | NM_006036       | ref Homo sapiens prolyl endopeptidase-like (PREPL), transcript variant 1, mRNA [NM_006036]                                      |
| -1.53 | 0.00014 | 0.057 | <b>PTP4A2</b>      | NM_080391       | ref Homo sapiens protein tyrosine phosphatase type IVA, member 2 (PTP4A2), transcript variant 1, mRNA [NM_080391]               |
| 1.98  | 0.00001 | 0.055 | <b>RASD1</b>       | NM_016084       | ref Homo sapiens RAS, dexamethasone-induced 1 (RASD1), transcript variant 1, mRNA [NM_016084]                                   |
| 1.99  | 0.00001 | 0.055 | <b>RASD1</b>       | NM_016084       | ref Homo sapiens RAS, dexamethasone-induced 1 (RASD1), transcript variant 1, mRNA [NM_016084]                                   |
| 2.01  | 0.00001 | 0.055 | <b>RASD1</b>       | NM_016084       | ref Homo sapiens RAS, dexamethasone-induced 1 (RASD1), transcript variant 1, mRNA [NM_016084]                                   |
| 2.01  | 0.00002 | 0.055 | <b>RASD1</b>       | NM_016084       | ref Homo sapiens RAS, dexamethasone-induced 1 (RASD1), transcript variant 1, mRNA [NM_016084]                                   |
| 2.02  | 0.00008 | 0.055 | <b>RASD1</b>       | NM_016084       | ref Homo sapiens RAS, dexamethasone-induced 1 (RASD1), transcript variant 1, mRNA [NM_016084]                                   |
| 2.04  | 0.00006 | 0.055 | <b>RASD1</b>       | NM_016084       | ref Homo sapiens RAS, dexamethasone-induced 1 (RASD1), transcript variant 1, mRNA [NM_016084]                                   |
| 2.06  | 0.00012 | 0.055 | <b>RASD1</b>       | NM_016084       | ref Homo sapiens RAS, dexamethasone-induced 1 (RASD1), transcript variant 1, mRNA [NM_016084]                                   |
| 2.09  | 0.00003 | 0.055 | <b>RASD1</b>       | NM_016084       | ref Homo sapiens RAS, dexamethasone-induced 1 (RASD1), transcript variant 1, mRNA [NM_016084]                                   |
| 2.10  | 0.00003 | 0.055 | <b>RASD1</b>       | NM_016084       | ref Homo sapiens RAS, dexamethasone-induced 1 (RASD1), transcript variant 1, mRNA [NM_016084]                                   |
| 2.14  | 0.00002 | 0.055 | <b>RASD1</b>       | NM_016084       | ref Homo sapiens RAS, dexamethasone-induced 1 (RASD1), transcript variant 1, mRNA [NM_016084]                                   |
| -2.04 | 0.00036 | 0.071 | <b>RMRP</b>        | NR_003051       | ref Homo sapiens RNA component of mitochondrial RNA processing endoribonuclease (RMRP), RNase MRP RNA [NR_003051]               |
| -3.03 | 0.00044 | 0.073 | <b>RN7SL1</b>      | NR_002715       | ref Homo sapiens RNA, 7SL, cytoplasmic 1 (RN7SL1), SRP RNA [NR_002715]                                                          |
| -1.96 | 0.00009 | 0.055 | <b>RNU2-1</b>      | NR_002716       | ref Homo sapiens RNA, U2 small nuclear 1 (RNU2-1), small nuclear RNA [NR_002716]                                                |
| -1.62 | 0.00075 | 0.077 | <b>RPL13P5</b>     | NR_002803       | ref Homo sapiens ribosomal protein L13 pseudogene 5 (RPL13P5), non-coding RNA [NR_002803]                                       |
| -1.55 | 0.00025 | 0.066 | <b>SATB1</b>       | NM_002971       | ref Homo sapiens SATB homeobox 1 (SATB1), transcript variant 1, mRNA [NM_002971]                                                |
| 1.70  | 0.00056 | 0.073 | <b>SERPINI1</b>    | NM_005025       | ref Homo sapiens serpin peptidase inhibitor, clade I (neuroserpin), member 1 (SERPINI1), transcript variant 1, mRNA [NM_005025] |
| -1.63 | 0.00013 | 0.055 | <b>SGSM2</b>       | ENST00000574857 | ens small G protein signaling modulator 2 [Source:HGNC Symbol;Acc:HGNC:29026] [ENST00000574857]                                 |

**SUPPLEMENTARY INFORMATION: The role of glycosyltransferase enzyme GCNT3 in colon and ovarian cancer prognosis and chemoresistance**

|       |         |       |                       |                   |                                                                                                                                                                                     |
|-------|---------|-------|-----------------------|-------------------|-------------------------------------------------------------------------------------------------------------------------------------------------------------------------------------|
| -1.78 | 0.00028 | 0.068 | <b>SIKE1</b>          | NM_001102396      | ref Homo sapiens suppressor of IKBKE 1 (SIKE1), transcript variant 1, mRNA [NM_001102396]                                                                                           |
| -1.53 | 0.00004 | 0.055 | <b>SLC25A16</b>       | BC001407          | gb Homo sapiens solute carrier family 25 (mitochondrial carrier; Graves disease autoantigen), member 16, mRNA (cDNA clone IMAGE:3139311), with apparent retained intron. [BC001407] |
| -1.51 | 0.00005 | 0.055 | <b>SLC39A5</b>        | NM_001135195      | ref Homo sapiens solute carrier family 39 (zinc transporter), member 5 (SLC39A5), transcript variant 2, mRNA [NM_001135195]                                                         |
| 1.58  | 0.00039 | 0.071 | <b>SLC5A3</b>         | NM_006933         | ref Homo sapiens solute carrier family 5 (sodium/myo-inositol cotransporter), member 3 (SLC5A3), mRNA [NM_006933]                                                                   |
| -1.60 | 0.00087 | 0.079 | <b>SLX4IP</b>         | NM_001009608      | ref Homo sapiens SLX4 interacting protein (SLX4IP), mRNA [NM_001009608]                                                                                                             |
| -1.56 | 0.00013 | 0.055 | <b>SMA4</b>           | NR_024054         | ref Homo sapiens glucuronidase, beta pseudogene (SMA4), transcript variant 2, non-coding RNA [NR_024054]                                                                            |
| -1.78 | 0.00077 | 0.077 | <b>SMC1A</b>          | NM_001281463      | ref Homo sapiens structural maintenance of chromosomes 1A (SMC1A), transcript variant 2, mRNA [NM_001281463]                                                                        |
| -2.57 | 0.00084 | 0.078 | <b>SNORA28</b>        | NR_002964         | ref Homo sapiens small nucleolar RNA, H/ACA box 28 (SNORA28), small nucleolar RNA [NR_002964]                                                                                       |
| -2.51 | 0.00079 | 0.077 | <b>SNORA73B</b>       | NR_004404         | ref Homo sapiens small nucleolar RNA, H/ACA box 73B (SNORA73B), small nucleolar RNA [NR_004404]                                                                                     |
| -1.56 | 0.00007 | 0.055 | <b>SNORA74A</b>       | NR_002915         | ref Homo sapiens small nucleolar RNA, H/ACA box 74A (SNORA74A), small nucleolar RNA [NR_002915]                                                                                     |
| -1.72 | 0.00014 | 0.055 | <b>SPATA13</b>        | NM_153023         | ref Homo sapiens spermatogenesis associated 13 (SPATA13), transcript variant 2, mRNA [NM_153023]                                                                                    |
| -1.68 | 0.00032 | 0.068 | <b>SRP72</b>          | NM_006947         | ref Homo sapiens signal recognition particle 72kDa (SRP72), transcript variant 1, mRNA [NM_006947]                                                                                  |
| -1.67 | 0.00068 | 0.076 | <b>SRSF11</b>         | NM_001190987      | ref Homo sapiens serine/arginine-rich splicing factor 11 (SRSF11), transcript variant 2, mRNA [NM_001190987]                                                                        |
| -1.86 | 0.00001 | 0.055 | <b>SSB</b>            | NM_003142         | ref Homo sapiens Sjogren syndrome antigen B (autoantigen La) (SSB), transcript variant 1, mRNA [NM_003142]                                                                          |
| -1.92 | 0.00018 | 0.060 | <b>SYT1</b>           | NM_005639         | ref Homo sapiens synaptotagmin I (SYT1), transcript variant 1, mRNA [NM_005639]                                                                                                     |
| 1.63  | 0.00032 | 0.068 | <b>SYT13</b>          | NM_020826         | ref Homo sapiens synaptotagmin XIII (SYT13), transcript variant 1, mRNA [NM_020826]                                                                                                 |
| -1.54 | 0.00003 | 0.055 | <b>TBL1X</b>          | NM_005647         | ref Homo sapiens transducin (beta)-like 1X-linked (TBL1X), transcript variant 1, mRNA [NM_005647]                                                                                   |
| -1.81 | 0.00048 | 0.073 | <b>TCF25</b>          | NM_014972         | ref Homo sapiens transcription factor 25 (basic helix-loop-helix) (TCF25), mRNA [NM_014972]                                                                                         |
| -1.79 | 0.00011 | 0.055 | <b>TINAGL1</b>        | NM_022164         | ref Homo sapiens tubulointerstitial nephritis antigen-like 1 (TINAGL1), transcript variant 1, mRNA [NM_022164]                                                                      |
| -1.59 | 0.00070 | 0.076 | <b>TMEM125</b>        | NM_144626         | ref Homo sapiens transmembrane protein 125 (TMEM125), mRNA [NM_144626]                                                                                                              |
| 1.89  | 0.00004 | 0.055 | <b>TNFAIP2</b>        | NM_006291         | ref Homo sapiens tumor necrosis factor, alpha-induced protein 2 (TNFAIP2), mRNA [NM_006291]                                                                                         |
| -2.36 | 0.00029 | 0.068 | <b>TRMT61A</b>        | NM_152307         | ref Homo sapiens tRNA methyltransferase 61A (TRMT61A), mRNA [NM_152307]                                                                                                             |
| -1.62 | 0.00007 | 0.055 | <b>TXLNG</b>          | NM_018360         | ref Homo sapiens taxilin gamma (TXLNG), transcript variant 1, mRNA [NM_018360]                                                                                                      |
| -1.54 | 0.00048 | 0.073 | <b>UBE2O</b>          | NM_022066         | ref Homo sapiens ubiquitin-conjugating enzyme E2O (UBE2O), mRNA [NM_022066]                                                                                                         |
| -1.63 | 0.00045 | 0.073 | <b>UCP3</b>           | NM_022803         | ref Homo sapiens uncoupling protein 3 (mitochondrial, proton carrier) (UCP3), transcript variant short, mRNA [NM_022803]                                                            |
| -1.66 | 0.00003 | 0.055 | <b>UPF2</b>           | NM_080599         | ref Homo sapiens UPF2 regulator of nonsense transcripts homolog (yeast) (UPF2), transcript variant 1, mRNA [NM_080599]                                                              |
| -1.64 | 0.00011 | 0.055 | <b>USP16</b>          | NM_001001992      | ref Homo sapiens ubiquitin specific peptidase 16 (USP16), transcript variant 2, mRNA [NM_001001992]                                                                                 |
| -2.03 | 0.00016 | 0.059 | <b>USP42</b>          | NM_032172         | ref Homo sapiens ubiquitin specific peptidase 42 (USP42), mRNA [NM_032172]                                                                                                          |
| -1.52 | 0.00046 | 0.073 | <b>UTP23</b>          | NM_032334         | ref Homo sapiens UTP23, small subunit (SSU) processome component, homolog (yeast) (UTP23), mRNA [NM_032334]                                                                         |
| -1.67 | 0.00085 | 0.079 | <b>VAPB</b>           | NM_004738         | ref Homo sapiens VAMP (vesicle-associated membrane protein)-associated protein B and C (VAPB), transcript variant 1, mRNA [NM_004738]                                               |
| -1.64 | 0.00065 | 0.075 | <b>VEGFA</b>          | NM_001025370      | ref Homo sapiens vascular endothelial growth factor A (VEGFA), transcript variant 6, mRNA [NM_001025370]                                                                            |
| -1.82 | 0.00018 | 0.060 | <b>XLOC_I2_013383</b> | TCONS_I2_00025857 | linc BROAD Institute lincRNA (XLOC_I2_013383), lincRNA [TCONS_I2_00025857]                                                                                                          |
| -1.61 | 0.00059 | 0.074 | <b>ZKSCAN1</b>        | NM_001287054      | ref Homo sapiens zinc finger with KRAB and SCAN domains 1 (ZKSCAN1), transcript variant 2, mRNA [NM_001287054]                                                                      |
| -1.66 | 0.00002 | 0.055 | <b>ZNF587</b>         | NM_032828         | ref Homo sapiens zinc finger protein 587 (ZNF587), transcript variant 1, mRNA [NM_032828]                                                                                           |
| -1.72 | 0.00005 | 0.055 | <b>ZNF587</b>         | NM_032828         | ref Homo sapiens zinc finger protein 587 (ZNF587), transcript variant 1, mRNA [NM_032828]                                                                                           |

**SUPPLEMENTARY INFORMATION: The role of glycosyltransferase enzyme GCNT3 in colon and ovarian cancer prognosis and chemoresistance**

|       |         |       |               |           |                                                                                           |
|-------|---------|-------|---------------|-----------|-------------------------------------------------------------------------------------------|
| -1.69 | 0.00018 | 0.060 | <b>ZNF587</b> | NM_032828 | ref Homo sapiens zinc finger protein 587 (ZNF587), transcript variant 1, mRNA [NM_032828] |
| -1.75 | 0.00028 | 0.068 | <b>ZNF587</b> | NM_032828 | ref Homo sapiens zinc finger protein 587 (ZNF587), transcript variant 1, mRNA [NM_032828] |
| -1.68 | 0.00055 | 0.073 | <b>ZNF587</b> | NM_032828 | ref Homo sapiens zinc finger protein 587 (ZNF587), transcript variant 1, mRNA [NM_032828] |
| -1.80 | 0.00084 | 0.078 | <b>ZNF587</b> | NM_032828 | ref Homo sapiens zinc finger protein 587 (ZNF587), transcript variant 1, mRNA [NM_032828] |

**Supplementary Table 4. Gene ontology (GO) terms obtained from transcriptomic study of GCNT3.**

| Items      | Items_Details                                                             | Support | List size | Reference Support | Reference size | Hyp      | Hyp_c    | Genes                                                                                                                                                                                                           |
|------------|---------------------------------------------------------------------------|---------|-----------|-------------------|----------------|----------|----------|-----------------------------------------------------------------------------------------------------------------------------------------------------------------------------------------------------------------|
| GO:0000278 | mitotic cell cycle (BP)                                                   | 34      | 751       | 304               | 34208          | 9.69E-15 | 1.75E-11 | CDC20,MAPRE1,CENPP,BUB1,KIF23,ERCC6L,CCDC99,PSMD10,CDKN2C,AURKB,UBB,PLK1,PSMD6,SMC1A,RCC2,CCNB1,NINL,CENPF,CCNA2,RPA3,CDK5RAP2,GINS2,NUF2,PCNA,TYMS,ANAPC1,CCNB2,STAG2,OFD1,CENPA,NDC80,ORC6,KIF20A,NEDD1       |
| GO:0000087 | M phase of mitotic cell cycle (BP)                                        | 18      | 751       | 95                | 34208          | 2.63E-12 | 1.59E-09 | CDC20,MAPRE1,CENPP,BUB1,KIF23,ERCC6L,CCDC99,AURKB,PLK1,SMC1A,RCC2,CENPF,DLGAP5,NUF2,STAG2,CENPA,NDC80,KIF20A                                                                                                    |
| GO:0000122 | negative regulation of transcription from RNA polymerase II promoter (BP) | 36      | 751       | 416               | 34208          | 3.72E-12 | 1.68E-09 | HSBP1,SATB1,RPS14,PPARG,LEF1,TBL1X,PSMD10,AURKB,EGR1,TBL1XR1,EFNA1,SETD8,PLK1,ASCL2,DKK1,FOXM1,C19orf2,PAWR,EPC1,NR6A1,TCF7L2,PCNA,VAX2,TCF25,NFIC,DRAP1,MDF1,RXRA,TAF3,PKIG,HOXA7,DNMT3A,MSX1,ZNF148,MXI1,FOSB |
| GO:0051301 | cell division (BP)                                                        | 30      | 751       | 286               | 34208          | 1.93E-12 | 1.74E-09 | CDC20,MAPRE1,CDCA3,BUB1,ERCC6L,NEK4,CCDC99,CDCA2,SETD8,USP16,PSRC1,SMC1A,CDC40,RC2,CCNB1,MAEA,CENPF,KIFC1,CCNA2,NUF2,ANAPC1,CCNB2,STAG2,ASPM,NDC80,CDK11A,NEDD1,SMC4,NEDD9,MAU2                                 |
| GO:0000236 | mitotic prometaphase (BP)                                                 | 16      | 751       | 85                | 34208          | 4.79E-11 | 1.73E-08 | CDC20,MAPRE1,CENPP,BUB1,ERCC6L,CCDC99,AURKB,PLK1,SMC1A,RCC2,CCNB1,CENPF,NUF2,STAG2,CENPA,NDC80                                                                                                                  |
| GO:0007067 | mitosis (BP)                                                              | 21      | 751       | 187               | 34208          | 1.16E-09 | 3.48E-07 | CDCA3,KIF23,NEK4,EML4,CDCA2,SETD8,PLK1,USP16,PSRC1,CCNA2,NUF2,ANAPC1,CCNB2,OFD1,ASPM,NDC80,ANLN,CDK11A,NEDD1,NEDD9,MAU2                                                                                         |
| GO:0045944 | positive regulation of transcription from RNA polymerase II promoter (BP) | 36      | 751       | 578               | 34208          | 2.84E-08 | 7.34E-06 | FOS,SMARCB1,PPARG,LEF1,VEGFA,KLF6,TBL1X,NFYA,EGR1,TBL1XR1,EVX1,FSTL3,LMO4,CHD8,PHIP,FOXO1,CYTL1,BCL11A,FOXM1,RNF10,TLR4,EPC1,IL10,TCF7L2,SIX1,NFIC,TBL1Y,RXRA,RHOQ,BCL9L,HOXA7,MSX1,ZNF148,THRAP3,PLAGL2,HIF3A  |
| GO:0006334 | nucleosome assembly (BP)                                                  | 14      | 751       | 102               | 34208          | 5.36E-08 | 1.21E-05 | CENPP,HIST1H1E,HIST1H2AD,HIST2H2AB,HIST2H2AC,HIST1H2AH,HIST1H1C,HP1BP3,HIST1H2BN,HIST1H2AJ,CENPA,HIST1H4A,HIST1H2BB,HIST1H2AC                                                                                   |
| GO:0016070 | RNA metabolic process (BP)                                                | 22      | 751       | 257               | 34208          | 7.05E-08 | 1.42E-05 | ZFP36L1,RPS14,EDC4,RPS29,UPF3A,PSMD10,UBB,RPL37A,RPL28,EIF4G2,PABPC1,SMG1,PSMD6,UPF2,RPL31,EIF4A1,XRN2,RPL39,SNUPN,LENG9,YWHA,DDX6                                                                              |
| GO:0008283 | cell proliferation (BP)                                                   | 24      | 751       | 312               | 34208          | 1.37E-07 | 2.47E-05 | MAPRE1,EHF,EMP1,CDK9,BUB1,PRDM4,INSIG1,AURKB,PTEN,PLK1,SRRT,CDK5R1,CENPF,APPL1,DLGAP5,NR6A1,STIL,TCF7L2,PCNA,EPS8,PIM2,MET,CDK11A,CHRM3                                                                         |
| GO:0042493 | response to drug (BP)                                                     | 23      | 751       | 301               | 34208          | 2.79E-07 | 4.58E-05 | FYN,ARG2,FOS,PPARG,NES,PRSS8,ABCB1,SRP72,CPT1A,SMPD1,PTK2B,CCNB1,CENPF,IL10,MSH2,TYMS,MS,TOP2A,PAM,GNAS,MET,CST3,PLIN2,PDGFR                                                                                    |
| GO:0006412 | translation (BP)                                                          | 20      | 751       | 241               | 34208          | 4.52E-07 | 6.80E-05 | RPS14,MRPS7,RPS29,MRPS33,RPL37A,RPL28,EIF4G2,PABPC1,MRPS24,MRPS6,MRPS23,EEF1A1,RPL22L1,RPL31,EIF4A1,RPL39,RRBP1,EIF4E2,IGF2BP3,EIF3A                                                                            |
| GO:0045893 | positive regulation of transcription, DNA-dependent (BP)                  | 29      | 751       | 468               | 34208          | 6.99E-07 | 9.71E-05 | FOS,PPARG,EHF,LEF1,KLF6,TBL1X,EGR1,TBL1XR1,USP16,CHD8,PHIP,PSRC1,FOXO1,CCNA2,FOXM1,AAP1L2,TAF15,RNF10,ZSCAN21,CDK5RAP2,EPC1,IL10,MED4,OVOL2,SIX1,PIM2,PLCB1,ANKRD49,THRAP3                                      |
| GO:0000086 | G2/M transition of mitotic cell cycle (BP)                                | 13      | 751       | 115               | 34208          | 1.55E-06 | 2.00E-04 | MAPRE1,NES,ABCB1,PLK1,CCNB1,NINL,CCNA2,FOXM1,CDK5RAP2,CCNB2,OFD1,PLCB1,NEDD1                                                                                                                                    |

**SUPPLEMENTARY INFORMATION: The role of glycosyltransferase enzyme GCNT3 in colon and ovarian cancer prognosis and chemoresistance**

|            |                                                             |    |     |      |       |          |          |                                                                                                                                                                                                                                                                                                                                                                                           |
|------------|-------------------------------------------------------------|----|-----|------|-------|----------|----------|-------------------------------------------------------------------------------------------------------------------------------------------------------------------------------------------------------------------------------------------------------------------------------------------------------------------------------------------------------------------------------------------|
| GO:0016071 | mRNA metabolic process (BP)                                 | 18 | 751 | 223  | 34208 | 2.50E-06 | 2.82E-04 | ZFP36L1,RPS14,EDC4,RPS29,UPF3A,PSMD10,UBB,RPL37A,RPL28,PABPC1,SMG1,PSMD6,UPF2,RPL31,EIF4A1,RPL39,YWHAB,DDX6                                                                                                                                                                                                                                                                               |
| GO:0008285 | negative regulation of cell proliferation (BP)              | 23 | 751 | 341  | 34208 | 2.40E-06 | 2.90E-04 | SMARCB1,PPARG,FTH1,CDKN2C,PTEN,PTK2B,SPRY2,BTG2,PAWR,ASPH,LEPREL2,STK4,SPRY1,OVOL2,TENC1,PIM2,TBRG1,RXRA,CAV2,HSF1,MSX1,PPAP2A,MXI1                                                                                                                                                                                                                                                       |
| GO:0007049 | cell cycle (BP)                                             | 26 | 751 | 435  | 34208 | 4.99E-06 | 5.00E-04 | CDC20,SMARCB1,CDCA3,CDK9,NEK4,DMTF1,AURKB,CDCA2,SETD8,ATR,USP16,PSRC1,GOS2,MAEA,APP11,KIFC1,FOXM1,DLGAP5,PIM2,ASPM,TBRG1,NDC80,ANLN,SMC4,NEDD9,MAU2                                                                                                                                                                                                                                       |
| GO:0010467 | gene expression (BP)                                        | 25 | 751 | 408  | 34208 | 4.91E-06 | 5.21E-04 | RPS14,PPARG,PPA2,CDK9,RPS29,RPL37A,RPL28,FRS2,PABPC1,SRSF7,SF3B3,SMC1A,CDC40,EEF1A1,RPL31,SRSF11,EIF4A1,NR6A1,RPL39,MED4,LARS,NUDT21,RXRA,EIF3A,IARS                                                                                                                                                                                                                                      |
| GO:0006397 | mRNA processing (BP)                                        | 16 | 751 | 202  | 34208 | 1.13E-05 | 1.07E-03 | RNPC3,SPOP,LGALS3,HNRNPA1L2,ROD1,ESRP1,A1CF,SRSF7,PDCD11,SF3B3,CDK13,DHX15,SRSF11,XRN2,CELF1,NUDT21                                                                                                                                                                                                                                                                                       |
| GO:0006355 | regulation of transcription, DNA-dependent (BP)             | 62 | 751 | 1609 | 34208 | 1.46E-05 | 1.32E-03 | ZFP36L1,CDK9,PRDM4,KLF6,GTF2H5,DMTF1,NFYA,SF1,EVX1,ASCL2,LMO4,ZNF618,ZNF280D,ZMYM2,ZNF226,ZNF770,KRBA2,ASCC3,FOXO2,ZNF587,BCL11A,EEF1A1,PDE8B,ZNF525,BTG2,TGFBRAP1,FOXO1,CCNL1,XRN2,PAWR,ZSCAN21,LEO1,ZNF329,TXLNG,NFATC2IP,VAX2,CCNL2,TP53,ZKSCAN1,FOXO2,SIX1,KLHL31,NFIC,CHD9,ZNF720,MYCBP2,WWC1,RFX1,TAF3,MYT1,CEBPB,PASK,BCL9L,HSF1,ZNF658,ZBTB8A,CDK11A,PLAGL2,HIF3A,ARID3A,MXI1,BBX |
| GO:0006917 | induction of apoptosis (BP)                                 | 15 | 751 | 185  | 34208 | 1.60E-05 | 1.38E-03 | NUDT2,PPARG,LEF1,CDKN2C,PTEN,FOXO2,BNIP3,PAWR,TP53BP2,TNFSF10,STK4,PDCD7,PMAIP1,CEBPB,PLAGL2                                                                                                                                                                                                                                                                                              |
| GO:0060325 | face morphogenesis (BP)                                     | 6  | 751 | 26   | 34208 | 1.74E-05 | 1.43E-03 | LEF1,DKK1,PLEKHA1,RAB3GAP1,ASPH,MSX1                                                                                                                                                                                                                                                                                                                                                      |
| GO:0006281 | DNA repair (BP)                                             | 19 | 751 | 285  | 34208 | 2.08E-05 | 1.64E-03 | EEPD1,NUDT1,UBB,ATR,SMG1,SMC1A,BTG2,FOXO1,RPA3,RAD51AP1,MSH2,PCNA,TYMS,SUMO1,TOP2A,POLQ,XRCC4,NSMCE2,SMC4                                                                                                                                                                                                                                                                                 |
| GO:0006915 | apoptotic process (BP)                                      | 30 | 751 | 594  | 34208 | 2.58E-05 | 1.79E-03 | ARG2,PLEC,SH3KBP1,RABEP1,SATB1,BUB1,TJP2,CASP9,NET1,PSMD10,UBB,PSMD6,PTK2B,APPL1,PAWR,ARHGEF3,TP53BP2,BCL7C,TNFSF10,PDCD7,DIT4,FASTK,LMNA,TNS4,YWHAB,PMAIP1,GSN,RNF130,CST3,CDK11A                                                                                                                                                                                                        |
| GO:0000079 | regulation of cyclin-dependent protein kinase activity (BP) | 8  | 751 | 55   | 34208 | 2.55E-05 | 1.84E-03 | CDKN2C,PTEN,CCNB1,CDK5R1,CCNA2,CCNL1,CCNL2,CCNB2                                                                                                                                                                                                                                                                                                                                          |
| GO:0001578 | microtubule bundle formation (BP)                           | 5  | 751 | 17   | 34208 | 2.50E-05 | 1.88E-03 | PLK1,NAV1,PSRC1,CDK5RAP2,KIF20A                                                                                                                                                                                                                                                                                                                                                           |
| GO:0045892 | negative regulation of transcription, DNA-dependent (BP)    | 23 | 751 | 401  | 34208 | 3.29E-05 | 2.20E-03 | PPARG,LEF1,YWHAQ,TBL1X,TBL1XR1,SETD8,CHD8,FOXO2,TRIM66,CDK5R1,CENPF,FOXO1,EPC1,TCF7L2,SUMO1,OVOL2,YWHAB,TBL1Y,RASD1,PLCB1,CEBPB,HOXA7,ZNF148                                                                                                                                                                                                                                              |
| GO:0043066 | negative regulation of apoptotic process (BP)               | 18 | 751 | 272  | 34208 | 3.75E-05 | 2.42E-03 | NES,LEF1,VEGFA,PSMD10,PTEN,PLK1,PTK2B,CHD8,PHIP,PLAUR,SPRY2,TSC22D1,BTG2,BNIP3L,STIL,PLK2,MSX1,PRDX3                                                                                                                                                                                                                                                                                      |
| GO:0006605 | protein targeting (BP)                                      | 6  | 751 | 30   | 34208 | 4.16E-05 | 2.59E-03 | YWHAQ,TOMM20L,AKAP12,SYNGR1,YWHAB,HOMER3                                                                                                                                                                                                                                                                                                                                                  |
| GO:0006260 | DNA replication (BP)                                        | 12 | 751 | 152  | 34208 | 1.42E-04 | 8.29E-03 | ATR,CENPF,RPA3,GINS2,PCNA,TYMS,TP53,POLQ,RBMS1,NFIC,TBRG1,ORC6                                                                                                                                                                                                                                                                                                                            |
| GO:0000132 | establishment of mitotic spindle                            | 4  | 751 | 13   | 34208 | 1.41E-04 | 8.47E-03 | CCDC99,CDK5RAP2,CENPA,NDC80                                                                                                                                                                                                                                                                                                                                                               |

**SUPPLEMENTARY INFORMATION: The role of glycosyltransferase enzyme GCNT3 in colon and ovarian cancer prognosis and chemoresistance**

|            |                                                                                                     |    |     |     |       |          |          |                                                                                                               |
|------------|-----------------------------------------------------------------------------------------------------|----|-----|-----|-------|----------|----------|---------------------------------------------------------------------------------------------------------------|
|            | orientation (BP)                                                                                    |    |     |     |       |          |          |                                                                                                               |
| GO:0000075 | cell cycle checkpoint (BP)                                                                          | 11 | 751 | 131 | 34208 | 1.55E-04 | 8.76E-03 | CDC20,PSMD10,UBB,ATR,PSMD6,SMC1A,CCNB1,RPA3,ANAPC1,CCNB2,ORC6                                                 |
| GO:0001701 | in utero embryonic development (BP)                                                                 | 13 | 751 | 179 | 34208 | 1.76E-04 | 9.65E-03 | VEGFA,ASCL2,ANKRD11,CHD8,CCNB1,PKD1,ATP7A,STIL,TPM1,MSH2,CCNB2,XRCC4,MSX1                                     |
| GO:0048015 | phosphatidylinositol-mediated signaling (BP)                                                        | 8  | 751 | 73  | 34208 | 1.99E-04 | 1.06E-02 | CASP9,PTEN,PTAFR,PCNA,TYMS,TOP2A,NDC80,GSN                                                                    |
| GO:0044267 | cellular protein metabolic process (BP)                                                             | 17 | 751 | 284 | 34208 | 2.05E-04 | 1.06E-02 | PFDN6,RPS14,RPS29,RPL37A,TUBB6,RPL28,ALG11,PABPC1,CCT6A,PLAUR,EEF1A1,RPL31,EIF4A1,RPL39,UGGT1,CANX,EIF3A      |
| GO:0000910 | cytokinesis (BP)                                                                                    | 7  | 751 | 56  | 34208 | 2.18E-04 | 1.09E-02 | KIF23,AURKB,PLK1,ANLN,KIF20A,ROCK2,STX2                                                                       |
| GO:0030518 | intracellular steroid hormone receptor signaling pathway (BP)                                       | 4  | 751 | 15  | 34208 | 2.59E-04 | 1.23E-02 | GPER,MED4,THRAP3,PPAP2A                                                                                       |
| GO:0000070 | mitotic sister chromatid segregation (BP)                                                           | 4  | 751 | 15  | 34208 | 2.59E-04 | 1.23E-02 | SMC1A,KIFC1,NDC80,SMC4                                                                                        |
| GO:0008380 | RNA splicing (BP)                                                                                   | 16 | 751 | 267 | 34208 | 3.08E-04 | 1.36E-02 | RNPC3,LGALS3,HNRNPA1L2,SF1,PPIG,PABPC1,SRSF7,SF3B3,SMC1A,CDC40,CDK13,DHX15,DDX5,SRSF11,PDCD7,NUDT21           |
| GO:0030855 | epithelial cell differentiation (BP)                                                                | 6  | 751 | 42  | 34208 | 2.94E-04 | 1.36E-02 | PPARG,EHF,VEGFA,F11R,SIX1,STX2                                                                                |
| GO:0006366 | transcription from RNA polymerase II promoter (BP)                                                  | 17 | 751 | 294 | 34208 | 3.07E-04 | 1.39E-02 | FOS,DEAF1,CDK9,PRDM4,NFYA,EGR1,LMO4,SRSF7,CDC40,TSC22D1,FOXM1,SRSF11,MED4,NFIC,NUDT21,CEBPB,ZNF148            |
| GO:0007052 | mitotic spindle organization (BP)                                                                   | 4  | 751 | 16  | 34208 | 3.40E-04 | 1.46E-02 | KIF3B,SMC1A,PLK2,NDC80                                                                                        |
| GO:0000082 | G1/S transition of mitotic cell cycle (BP)                                                          | 11 | 751 | 145 | 34208 | 3.76E-04 | 1.54E-02 | PSMD10,CDKN2C,UBB,PSMD6,CCNB1,RPA3,PCNA,TYMS,PIM2,PLK2,ORC6                                                   |
| GO:0031145 | anaphase-promoting complex-dependent proteasomal ubiquitin-dependent protein catabolic process (BP) | 8  | 751 | 80  | 34208 | 3.75E-04 | 1.57E-02 | CDC20,PSMD10,AURKB,UBB,PLK1,PSMD6,CCNB1,ANAPC1                                                                |
| GO:0016032 | viral reproduction (BP)                                                                             | 18 | 751 | 329 | 34208 | 4.03E-04 | 1.62E-02 | FYN,RPS14,CDK9,SLC25A4,RPS29,PSMD10,UBB,RPL37A,RPL28,PSMD6,RPL31,ZSCAN21,RPL39,ZKSCAN1,B2M,XRCC4,POM121,NUPL2 |
| GO:0021873 | forebrain neuroblast division (BP)                                                                  | 2  | 751 | 2   | 34208 | 4.81E-04 | 1.81E-02 | LEF1,ASPM                                                                                                     |
| GO:0048069 | eye pigmentation (BP)                                                                               | 2  | 751 | 2   | 34208 | 4.81E-04 | 1.81E-02 | LEF1,HPS1                                                                                                     |
| GO:0007092 | activation of mitotic anaphase-promoting complex activity (BP)                                      | 2  | 751 | 2   | 34208 | 4.81E-04 | 1.81E-02 | PTEN,PLK1                                                                                                     |



**SUPPLEMENTARY INFORMATION: The role of glycosyltransferase enzyme GCNT3 in colon and ovarian cancer prognosis and chemoresistance**

|            |                                                                                              |    |     |     |       |          |          |                                                                            |
|------------|----------------------------------------------------------------------------------------------|----|-----|-----|-------|----------|----------|----------------------------------------------------------------------------|
| GO:0001666 | response to hypoxia (BP)                                                                     | 12 | 751 | 175 | 34208 | 5.20E-04 | 1.92E-02 | ARG2,VEGFA,ASCL2,PTK2B,TLR4,DDIT4,UCP3,PAM,TFRC,CST3,HIF3A,PDGFA           |
| GO:0006921 | cellular component disassembly involved in apoptosis (BP)                                    | 6  | 751 | 49  | 34208 | 6.87E-04 | 2.48E-02 | PLEC,SATB1,TJP2,LMNA,PMAIP1,GSN                                            |
| GO:0014070 | response to organic cyclic compound (BP)                                                     | 9  | 751 | 112 | 34208 | 8.32E-04 | 2.55E-02 | FOS,LEF1,CPT1A,BTG2,MSH2,RXRA,MET,CST3,PLIN2                               |
| GO:0007417 | central nervous system development (BP)                                                      | 9  | 751 | 112 | 34208 | 8.32E-04 | 2.55E-02 | NES,PTEN,ASCL2,TP53BP2,STK4,PAM,XRCC4,SERPINI1,FMR1                        |
| GO:0006457 | protein folding (BP)                                                                         | 12 | 751 | 182 | 34208 | 7.36E-04 | 2.61E-02 | PFDN6,DNAJC19,PPID,DNAJC21,PPIG,TUBB6,CCT6A,FKBP2,C19orf2,FKBP9,UGGT1,CANX |
| GO:0008360 | regulation of cell shape (BP)                                                                | 8  | 751 | 90  | 34208 | 8.28E-04 | 2.62E-02 | FYN,SH3KBP1,VEGFA,MYH14,ARAP1,PTK2B,FMNL1,RHOQ                             |
| GO:0040007 | growth (BP)                                                                                  | 5  | 751 | 34  | 34208 | 8.26E-04 | 2.66E-02 | SEPP1,VEGFA,BMP8B,VPS54,CCNB2                                              |
| GO:0043086 | negative regulation of catalytic activity (BP)                                               | 5  | 751 | 34  | 34208 | 8.26E-04 | 2.66E-02 | PDE6D,PCSK9,CAMK2N1,NOSIP,ANP32E                                           |
| GO:0034614 | cellular response to reactive oxygen species (BP)                                            | 3  | 751 | 9   | 34208 | 8.02E-04 | 2.68E-02 | FOS,TPM1,PRDX3                                                             |
| GO:0043517 | positive regulation of DNA damage response, signal transduction by p53 class mediator (BP)   | 3  | 751 | 9   | 34208 | 8.02E-04 | 2.68E-02 | ATR,PMAIP1,MSX1                                                            |
| GO:0006119 | oxidative phosphorylation (BP)                                                               | 3  | 751 | 9   | 34208 | 8.02E-04 | 2.68E-02 | UQCRH,UQCRB,MSH2                                                           |
| GO:0018105 | peptidyl-serine phosphorylation (BP)                                                         | 6  | 751 | 52  | 34208 | 9.47E-04 | 2.76E-02 | PLK1,ATR,SMG1,CDK5R1,PKD1,STK4                                             |
| GO:0007568 | aging (BP)                                                                                   | 9  | 751 | 114 | 34208 | 9.44E-04 | 2.79E-02 | FOS,AURKB,TYMS,UCP3,TOP2A,CANX,RXRA,GSN,TFRC                               |
| GO:0051437 | positive regulation of ubiquitin-protein ligase activity involved in mitotic cell cycle (BP) | 7  | 751 | 71  | 34208 | 9.41E-04 | 2.83E-02 | CDC20,PSMD10,UBB,PLK1,PSMD6,CCNB1,ANAPC1                                   |
| GO:0050821 | protein stabilization (BP)                                                                   | 6  | 751 | 53  | 34208 | 1.05E-03 | 3.00E-02 | PTEN,A1CF,NAPG,PIM2,TBRG1,MSX1                                             |
| GO:0007213 | G-protein coupled acetylcholine receptor signaling pathway (BP)                              | 3  | 751 | 10  | 34208 | 1.13E-03 | 3.18E-02 | CDK5R1,PLCB1,CHRM3                                                         |
| GO:0051439 | regulation of ubiquitin-protein ligase activity involved in mitotic cell cycle (BP)          | 7  | 751 | 75  | 34208 | 1.30E-03 | 3.62E-02 | CDC20,PSMD10,UBB,PLK1,PSMD6,CCNB1,ANAPC1                                   |

**SUPPLEMENTARY INFORMATION: The role of glycosyltransferase enzyme GCNT3 in colon and ovarian cancer prognosis and chemoresistance**

|            |                                                                |    |     |     |       |          |          |                                                                                                                                                                                                    |
|------------|----------------------------------------------------------------|----|-----|-----|-------|----------|----------|----------------------------------------------------------------------------------------------------------------------------------------------------------------------------------------------------|
| GO:0006468 | protein phosphorylation (BP)                                   | 19 | 751 | 398 | 34208 | 1.44E-03 | 3.77E-02 | FYN,SGK1,CDK9,BUB1,NEK4,GMFG,PLK1,ATR,PTK2B,CDK13,CDK5R1,STK4,FASTK,PIM2,PLK2,PASK,HSF1,CDK11A,ROCK2                                                                                               |
| GO:0034261 | negative regulation of Ras GTPase activity (BP)                | 2  | 751 | 3   | 34208 | 1.42E-03 | 3.78E-02 | SPRY2,SPRY1                                                                                                                                                                                        |
| GO:0072089 | stem cell proliferation (BP)                                   | 2  | 751 | 3   | 34208 | 1.42E-03 | 3.78E-02 | NES,ABCB1                                                                                                                                                                                          |
| GO:0007080 | mitotic metaphase plate congression (BP)                       | 3  | 751 | 11  | 34208 | 1.52E-03 | 3.82E-02 | CCDC99,PSRC1,CCNB1                                                                                                                                                                                 |
| GO:0046209 | nitric oxide metabolic process (BP)                            | 3  | 751 | 11  | 34208 | 1.52E-03 | 3.82E-02 | CALM2,ZDHHC21,NOSIP                                                                                                                                                                                |
| GO:0010269 | response to selenium ion (BP)                                  | 3  | 751 | 11  | 34208 | 1.52E-03 | 3.82E-02 | ARG2,SEPP1,RXRA                                                                                                                                                                                    |
| GO:0007173 | epidermal growth factor receptor signaling pathway (BP)        | 7  | 751 | 76  | 34208 | 1.41E-03 | 3.85E-02 | SH3KBP1,UBB,PTK2B,SPRY2,SPRY1,EPH8,YWHAB                                                                                                                                                           |
| GO:0007264 | small GTPase mediated signal transduction (BP)                 | 16 | 751 | 312 | 34208 | 1.62E-03 | 4.00E-02 | RASL11B,PTPLAD1,SH2D3A,YWHAQ,NET1,RAB12,ARAP1,ARHGEF3,RAC3,ARL1,RAB30,YWHAB,RASD1,RHOQ,DEPDC1B,ARL4A                                                                                               |
| GO:0007059 | chromosome segregation (BP)                                    | 6  | 751 | 59  | 34208 | 1.84E-03 | 4.49E-02 | CENPF,CDK5RAP2,NUF2,TOP2A,NDC80,MAU2                                                                                                                                                               |
| GO:0009790 | embryo development (BP)                                        | 9  | 751 | 128 | 34208 | 2.12E-03 | 4.73E-02 | BUB1,CDK5R1,FOXN1,TPM1,FOXN2,CELF1,MDFI,ATP5A1,PDGFA                                                                                                                                               |
| GO:0044255 | cellular lipid metabolic process (BP)                          | 9  | 751 | 128 | 34208 | 2.12E-03 | 4.73E-02 | TBL1X,TBL1XR1,CPT1A,AMACR,CPT2,CHD9,RXRA,AGPS,PLIN2                                                                                                                                                |
| GO:0043065 | positive regulation of apoptotic process (BP)                  | 11 | 751 | 178 | 34208 | 2.02E-03 | 4.74E-02 | NET1,SMPD1,FOXL2,TSC22D1,PAWR,TLR4,STK4,TOP2A,RXRA,PMAIP1,MSX1                                                                                                                                     |
| GO:0010800 | positive regulation of peptidyl-threonine phosphorylation (BP) | 3  | 751 | 12  | 34208 | 2.00E-03 | 4.75E-02 | PLK1,PHIP,MET                                                                                                                                                                                      |
| GO:0015074 | DNA integration (BP)                                           | 3  | 751 | 12  | 34208 | 2.00E-03 | 4.75E-02 | SMARCB1,KRBA2,PPFIBP1                                                                                                                                                                              |
| GO:0007275 | multicellular organismal development (BP)                      | 35 | 751 | 945 | 34208 | 2.06E-03 | 4.76E-02 | FYN,TNFAIP2,TSNAX,DEAF1,LSM14B,EHF,EMP1,NES,VEGFA,HOXA9,BMP8B,EVX1,MMP19,ASCL2,DKK1,NAV1,ATR,CDK13,SPRY2,UNC45A,CENPF,LEPR,STIL,ITGB5,VAX2,SPRY1,DISC1,MET,MYT1,HOXA7,RNF114,HOOK1,MSX1,HOXA6,FOSB |
| GO:0001541 | ovarian follicle development (BP)                              | 5  | 751 | 42  | 34208 | 2.19E-03 | 4.82E-02 | VEGFA,MMP19,FOXL2,LFNG,ERMP1                                                                                                                                                                       |
| GO:0007420 | brain development (BP)                                         | 11 | 751 | 179 | 34208 | 2.11E-03 | 4.83E-02 | SEPP1,NES,LEF1,RAB3GAP1,CDK5R1,CDK5RAP2,CE2,TCF7L2,TMEM57,MET,CST3                                                                                                                                 |
| GO:0006351 | transcription, DNA-dependent (BP)                              | 8  | 751 | 105 | 34208 | 2.24E-03 | 4.87E-02 | HOXA9,ASCL2,POLR3C,EPC1,SIX1,COL4A2,HOXA7,ZNF148                                                                                                                                                   |
| GO:0045040 | protein import into                                            | 2  | 751 | 4   | 34208 | 2.80E-03 | 4.97E-02 | HSPA4,SAMM50                                                                                                                                                                                       |

**SUPPLEMENTARY INFORMATION: The role of glycosyltransferase enzyme GCNT3 in colon and ovarian cancer prognosis and chemoresistance**

|            |                                                                  |    |     |     |       |          |          |                                                                                                                                              |
|------------|------------------------------------------------------------------|----|-----|-----|-------|----------|----------|----------------------------------------------------------------------------------------------------------------------------------------------|
|            | mitochondrial outer membrane (BP)                                |    |     |     |       |          |          | SLC25A4,FTH1                                                                                                                                 |
| GO:0060547 | negative regulation of necrotic cell death (BP)                  | 2  | 751 | 4   | 34208 | 2.80E-03 | 4.97E-02 |                                                                                                                                              |
| GO:0045617 | negative regulation of keratinocyte differentiation (BP)         | 2  | 751 | 4   | 34208 | 2.80E-03 | 4.97E-02 | OVOL2,HOXA7                                                                                                                                  |
| GO:0051256 | spindle midzone assembly involved in mitosis (BP)                | 2  | 751 | 4   | 34208 | 2.80E-03 | 4.97E-02 | KIF23,AURKB                                                                                                                                  |
| GO:0010626 | negative regulation of Schwann cell proliferation (BP)           | 2  | 751 | 4   | 34208 | 2.80E-03 | 4.97E-02 | ASCL2,RNF10                                                                                                                                  |
| GO:0071569 | protein ufmylation (BP)                                          | 2  | 751 | 4   | 34208 | 2.80E-03 | 4.97E-02 | UFM1,UFC1                                                                                                                                    |
| GO:0006122 | mitochondrial electron transport, ubiquinol to cytochrome c (BP) | 2  | 751 | 4   | 34208 | 2.80E-03 | 4.97E-02 | UQCRH,UQCRB                                                                                                                                  |
| GO:0030488 | tRNA methylation (BP)                                            | 2  | 751 | 4   | 34208 | 2.80E-03 | 4.97E-02 | TRMT61A,ALKBH8                                                                                                                               |
| GO:0006508 | proteolysis (BP)                                                 | 23 | 751 | 543 | 34208 | 2.31E-03 | 4.97E-02 | AMZ1,PREPL,DPEP3,USP42,CASP9,PRSS8,TBL1X,PRSS16,ADAMTS7,MMP19,USP16,PSMD6,PCSK9,ERMP1,ECE2,FBXW2,TINAGL1,BACE1,PRSS1,USP15,SEC11C,TFRC,SCRN2 |

**Supplementary Table 5. Proteomic analysis. List of 135 statistically significant GCNT3 interactors.**

| Protein IDs                 | Protein names                                                                                                                                                                                                                      | Gene names      | (-)Log p-value (G/N) | RATIO: G vs N |
|-----------------------------|------------------------------------------------------------------------------------------------------------------------------------------------------------------------------------------------------------------------------------|-----------------|----------------------|---------------|
| Q5T447                      | E3 ubiquitin-protein ligase HECTD3                                                                                                                                                                                                 | <i>HECTD3</i>   | 8.82372              | 4.58871       |
| Q8IWW8                      | E3 ubiquitin-protein ligase UBR2                                                                                                                                                                                                   | <i>UBR2</i>     | 8.609                | 8.26826       |
| O14874                      | [3-methyl-2-oxobutanoate dehydrogenase [lipoamide]] kinase, mitochondrial                                                                                                                                                          | <i>BCKDK</i>    | 7.90897              | 9.62341       |
| O95395                      | Beta-1,3-galactosyl-O-glycosyl-glycoprotein beta-1,6-N-acetylglucosaminyltransferase 3                                                                                                                                             | <i>GCNT3</i>    | 7.89244              | 16.2941       |
| O43242                      | 26S proteasome non-ATPase regulatory subunit 3                                                                                                                                                                                     | <i>PSMD3</i>    | 7.70338              | 3.14391       |
| Q9UBV2                      | Protein sel-1 homolog 1                                                                                                                                                                                                            | <i>SEL1L</i>    | 6.89164              | 6.65591       |
| Q9Y4L1                      | Hypoxia up-regulated protein 1                                                                                                                                                                                                     | <i>HYOU1</i>    | 6.70966              | 7.62646       |
| Q9NYU2                      | UDP-glucose:glycoprotein glucosyltransferase 1                                                                                                                                                                                     | <i>UGGT1</i>    | 6.54258              | 8.43405       |
| A0FGR8                      | Extended synaptotagmin-2                                                                                                                                                                                                           | <i>ESYT2</i>    | 6.1027               | 6.5107        |
| Q14CZ7                      | FAST kinase domain-containing protein 3                                                                                                                                                                                            | <i>FASTKD3</i>  | 6.05268              | 3.26691       |
| P46821                      | Microtubule-associated protein 1B;MAP1B heavy chain;MAP1 light chain LC1                                                                                                                                                           | <i>MAP1B</i>    | 6.01712              | 3.73571       |
| Q9NVI1                      | Fanconi anemia group I protein                                                                                                                                                                                                     | <i>FANCI</i>    | 5.80338              | 4.03871       |
| Q9H5Q4                      | Dimethyladenosine transferase 2, mitochondrial                                                                                                                                                                                     | <i>TFB2M</i>    | 5.64761              | 3.3497        |
| P16615                      | Sarcoplasmic/endoplasmic reticulum calcium ATPase 2                                                                                                                                                                                | <i>ATP2A2</i>   | 5.56566              | 9.15333       |
| Q9H936                      | Mitochondrial glutamate carrier 1                                                                                                                                                                                                  | <i>SLC25A22</i> | 5.48091              | 4.97025       |
| P10321                      | HLA class I histocompatibility antigen, Cw-7 alpha chain                                                                                                                                                                           | <i>HLA-C</i>    | 5.46607              | 6.74616       |
| P05556                      | Integrin beta-1                                                                                                                                                                                                                    | <i>ITGB1</i>    | 5.44772              | 4.647         |
| Q15165                      | Serum paraoxonase/arylesterase 2                                                                                                                                                                                                   | <i>PON2</i>     | 5.41825              | 6.28091       |
| Q9HCU5                      | Prolactin regulatory element-binding protein                                                                                                                                                                                       | <i>PREB</i>     | 5.21519              | 4.37881       |
| P01892;P10316;P01891;P30459 | HLA class I histocompatibility antigen, A-2 alpha chain;HLA class I histocompatibility antigen, A-69 alpha chain;HLA class I histocompatibility antigen, A-68 alpha chain;HLA class I histocompatibility antigen, A-74 alpha chain | <i>HLA-A</i>    | 5.18994              | 8.71486       |
| Q8NBM4                      | Ubiquitin-associated domain-containing protein 2                                                                                                                                                                                   | <i>UBAC2</i>    | 5.17362              | 1.90826       |
| Q9P2E5                      | Chondroitin sulfate glucuronyltransferase                                                                                                                                                                                          | <i>CHPF2</i>    | 5.17219              | 3.31574       |
| O43747                      | AP-1 complex subunit gamma-1                                                                                                                                                                                                       | <i>AP1G1</i>    | 5.16727              | 2.21284       |
| P61619                      | Protein transport protein Sec61 subunit alpha isoform 1                                                                                                                                                                            | <i>SEC61A1</i>  | 4.95791              | 6.64721       |
| Q96KA5                      | Cleft lip and palate transmembrane protein 1-like protein                                                                                                                                                                          | <i>CLPTM1L</i>  | 4.94787              | 2.56906       |
| Q9NYU1                      | UDP-glucose:glycoprotein glucosyltransferase 2                                                                                                                                                                                     | <i>UGGT2</i>    | 4.87748              | 5.86539       |
| Q9Y5L0                      | Transportin-3                                                                                                                                                                                                                      | <i>TNPO3</i>    | 4.851                | 5.26718       |
| P13667                      | Protein disulfide-isomerase A4                                                                                                                                                                                                     | <i>PDIA4</i>    | 4.80127              | 4.401         |
| P61221                      | ATP-binding cassette sub-family E member 1                                                                                                                                                                                         | <i>ABCE1</i>    | 4.78569              | 1.76521       |
| Q6ZRP7                      | Sulfhydryl oxidase 2                                                                                                                                                                                                               | <i>QSOX2</i>    | 4.61757              | 5.06459       |
| Q96DZ1                      | Endoplasmic reticulum lectin 1                                                                                                                                                                                                     | <i>ERLEC1</i>   | 4.53432              | 3.91795       |
| Q92947                      | Glutaryl-CoA dehydrogenase, mitochondrial                                                                                                                                                                                          | <i>GCDH</i>     | 4.52998              | 4.57925       |
| Q8TC07                      | TBC1 domain family member 15                                                                                                                                                                                                       | <i>TBC1D15</i>  | 4.4356               | 5.12027       |
| P57678                      | Gem-associated protein 4                                                                                                                                                                                                           | <i>GEMIN4</i>   | 4.39941              | 3.75927       |
| Q8N3Y3                      | Glycosyltransferase-like protein LARGE2;Xylosyltransferase LARGE2;Beta-1,3-glucuronyltransferase LARGE2                                                                                                                            | <i>GYLTL1B</i>  | 4.3815               | 4.24627       |
| O15269                      | Serine palmitoyltransferase 1                                                                                                                                                                                                      | <i>SPTLC1</i>   | 4.33366              | 5.23772       |
| Q5TAQ9                      | DDB1- and CUL4-associated factor 8                                                                                                                                                                                                 | <i>DCAF8</i>    | 4.31973              | 4.28822       |
| Q02978                      | Mitochondrial 2-oxoglutarate/malate carrier protein                                                                                                                                                                                | <i>SLC25A11</i> | 4.31928              | 4.7761        |
| Q9BW27                      | Nuclear pore complex protein Nup85                                                                                                                                                                                                 | <i>NUP85</i>    | 4.21892              | 4.16292       |

**SUPPLEMENTARY INFORMATION: The role of glycosyltransferase enzyme GCNT3 in colon and ovarian cancer prognosis and chemoresistance**

|                                             |                                                                                                                                                                      |                                                     |         |         |
|---------------------------------------------|----------------------------------------------------------------------------------------------------------------------------------------------------------------------|-----------------------------------------------------|---------|---------|
| Q9BRT8;Q8IU<br>F1;Q5RIA9;Q5J<br>T Y5;Q4V339 | COBW domain-containing protein 1;COBW domain-containing protein 2;COBW domain-containing protein 5;COBW domain-containing protein 3;COBW domain-containing protein 6 | <i>CBWD1;CBW<br/>D2;CBWD5;C<br/>BWD3;CBW<br/>D6</i> | 4.16984 | 4.07014 |
| P11717                                      | Cation-independent mannose-6-phosphate receptor                                                                                                                      | <i>IGF2R</i>                                        | 4.0737  | 5.33048 |
| P10253                                      | Lysosomal alpha-glucosidase;76 kDa lysosomal alpha-glucosidase;70 kDa lysosomal alpha-glucosidase                                                                    | <i>GAA</i>                                          | 4.03236 | 2.09295 |
| Q9H0X4                                      | Protein ITFG3                                                                                                                                                        | <i>ITFG3</i>                                        | 4.03216 | 3.78316 |
| Q8WWC4                                      | Uncharacterized protein C2orf47, mitochondrial                                                                                                                       | <i>C2orf47</i>                                      | 3.98712 | 4.43023 |
| Q9NX61                                      | Transmembrane protein 161A                                                                                                                                           | <i>TMEM161A</i>                                     | 3.98409 | 2.74751 |
| P27824                                      | Calnexin                                                                                                                                                             | <i>CANX</i>                                         | 3.97437 | 9.26043 |
| Q7L8L6                                      | FAST kinase domain-containing protein 5                                                                                                                              | <i>FASTKD5</i>                                      | 3.94827 | 4.61435 |
| O60762                                      | Dolichol-phosphate mannosyltransferase subunit 1                                                                                                                     | <i>DPM1</i>                                         | 3.92794 | 3.8626  |
| Q9Y653                                      | G-protein coupled receptor 56;GPR56 N-terminal fragment;GPR56 C-terminal fragment                                                                                    | <i>GPR56</i>                                        | 3.8648  | 3.97598 |
| Q5H9R7                                      | Serine/threonine-protein phosphatase 6 regulatory subunit 3                                                                                                          | <i>PPP6R3</i>                                       | 3.84825 | 3.91826 |
| Q92673                                      | Sortilin-related receptor                                                                                                                                            | <i>SORL1</i>                                        | 3.82489 | 8.96156 |
| Q8TEM1                                      | Nuclear pore membrane glycoprotein 210                                                                                                                               | <i>NUP210</i>                                       | 3.81807 | 3.93744 |
| O94822                                      | E3 ubiquitin-protein ligase listerin                                                                                                                                 | <i>LTN1</i>                                         | 3.79809 | 5.43276 |
| Q6P3X3                                      | Tetratricopeptide repeat protein 27                                                                                                                                  | <i>TTC27</i>                                        | 3.79526 | 5.3366  |
| O60613                                      | 15 kDa selenoprotein                                                                                                                                                 | <i>42628</i>                                        | 3.78446 | 3.82451 |
| Q96P70                                      | Importin-9                                                                                                                                                           | <i>IPO9</i>                                         | 3.75761 | 4.2719  |
| O43149                                      | Zinc finger ZZ-type and EF-hand domain-containing protein 1                                                                                                          | <i>ZZEF1</i>                                        | 3.7213  | 5.92507 |
| Q9HC07                                      | Transmembrane protein 165                                                                                                                                            | <i>TMEM165</i>                                      | 3.70854 | 3.80655 |
| Q6YHU6                                      | Thyroid adenoma-associated protein                                                                                                                                   | <i>THADA</i>                                        | 3.66756 | 4.39736 |
| Q9BXS4                                      | Transmembrane protein 59                                                                                                                                             | <i>TMEM59</i>                                       | 3.66069 | 4.17617 |
| Q9H497                                      | Torsin-3A                                                                                                                                                            | <i>TOR3A</i>                                        | 3.65872 | 4.71453 |
| P46977                                      | Dolichyl-diphosphooligosaccharide--protein glycosyltransferase subunit STT3A                                                                                         | <i>STT3A</i>                                        | 3.62803 | 5.95155 |
| Q9BT22                                      | Chitobiosyldiphosphodolichol beta-mannosyltransferase                                                                                                                | <i>ALG1</i>                                         | 3.61792 | 5.62443 |
| O75976                                      | Carboxypeptidase D                                                                                                                                                   | <i>CPD</i>                                          | 3.61184 | 3.95187 |
| P51571                                      | Translocon-associated protein subunit delta                                                                                                                          | <i>SSR4</i>                                         | 3.5527  | 4.62907 |
| Q9NX57                                      | Ras-related protein Rab-20                                                                                                                                           | <i>RAB20</i>                                        | 3.54591 | 5.45739 |
| Q9UJS0                                      | Calcium-binding mitochondrial carrier protein Aralar2                                                                                                                | <i>SLC25A13</i>                                     | 3.54523 | 2.78334 |
| P19021                                      | Peptidyl-glycine alpha-amidating monooxygenase;Peptidylglycine alpha-hydroxylating monooxygenase;Peptidyl-alpha-hydroxyglycine alpha-amidating lyase                 | <i>PAM</i>                                          | 3.42874 | 3.6497  |
| Q6P988                                      | Palmitoleoyl-protein carboxylesterase NOTUM                                                                                                                          | <i>NOTUM</i>                                        | 3.38472 | 5.12362 |
| O43592                                      | Exportin-T                                                                                                                                                           | <i>XPOT</i>                                         | 3.38404 | 5.9641  |
| Q13042                                      | Cell division cycle protein 16 homolog                                                                                                                               | <i>CDC16</i>                                        | 3.31605 | 3.89515 |
| Q9NXH8                                      | Torsin-4A                                                                                                                                                            | <i>TOR4A</i>                                        | 3.28504 | 3.38634 |
| Q9BWS9                                      | Chitinase domain-containing protein 1                                                                                                                                | <i>CHID1</i>                                        | 3.28324 | 3.78836 |
| O75197                                      | Low-density lipoprotein receptor-related protein 5                                                                                                                   | <i>LRP5</i>                                         | 3.26966 | 4.18258 |
| O60568                                      | Procollagen-lysine,2-oxoglutarate 5-dioxygenase 3                                                                                                                    | <i>PLOD3</i>                                        | 3.25464 | 3.12973 |
| P55060                                      | Exportin-2                                                                                                                                                           | <i>CSE1L</i>                                        | 3.19635 | 2.3847  |
| P52789                                      | Hexokinase-2                                                                                                                                                         | <i>HK2</i>                                          | 3.17721 | 3.26775 |
| Q969V3                                      | Nicalin                                                                                                                                                              | <i>NCLN</i>                                         | 3.1766  | 2.60123 |
| Q9NZ08                                      | Endoplasmic reticulum aminopeptidase 1                                                                                                                               | <i>ERAP1</i>                                        | 3.16621 | 3.93249 |
| Q96T76                                      | MMS19 nucleotide excision repair protein homolog                                                                                                                     | <i>MMS19</i>                                        | 3.14957 | 3.4413  |
| Q9H2H9                                      | Sodium-coupled neutral amino acid transporter 1                                                                                                                      | <i>SLC38A1</i>                                      | 3.14008 | 3.2158  |

**SUPPLEMENTARY INFORMATION: The role of glycosyltransferase enzyme GCNT3 in colon and ovarian cancer prognosis and chemoresistance**

|                                                  |                                                                                                                                                                                                                                                                                                                                                                                                                   |                       |         |         |
|--------------------------------------------------|-------------------------------------------------------------------------------------------------------------------------------------------------------------------------------------------------------------------------------------------------------------------------------------------------------------------------------------------------------------------------------------------------------------------|-----------------------|---------|---------|
| Q9C0E2                                           | Exportin-4                                                                                                                                                                                                                                                                                                                                                                                                        | <i>XPO4</i>           | 3,08311 | 3,47998 |
| Q8NBJS                                           | Procollagen galactosyltransferase 1                                                                                                                                                                                                                                                                                                                                                                               | <i>COLGALT1</i>       | 3,07312 | 3,30757 |
| Q9ULC5                                           | Long-chain-fatty-acid--CoA ligase 5                                                                                                                                                                                                                                                                                                                                                                               | <i>ACSL5</i>          | 3,06398 | 4,136   |
| Q15645                                           | Pachytene checkpoint protein 2 homolog                                                                                                                                                                                                                                                                                                                                                                            | <i>TRIP13</i>         | 3,0587  | 3,70127 |
| Q9NYP7                                           | Elongation of very long chain fatty acids protein 5                                                                                                                                                                                                                                                                                                                                                               | <i>ELOVL5</i>         | 3,04476 | 4,74811 |
| Q13438                                           | Protein OS-9                                                                                                                                                                                                                                                                                                                                                                                                      | <i>OS9</i>            | 3,0428  | 3,88637 |
| Q8IZ52                                           | Chondroitin sulfate synthase 2                                                                                                                                                                                                                                                                                                                                                                                    | <i>CHPF</i>           | 3,04053 | 3,37988 |
| Q12769                                           | Nuclear pore complex protein Nup160                                                                                                                                                                                                                                                                                                                                                                               | <i>NUP160</i>         | 2,99621 | 4,33823 |
| Q9HD45                                           | Transmembrane 9 superfamily member 3                                                                                                                                                                                                                                                                                                                                                                              | <i>TM9SF3</i>         | 2,95684 | 4,88098 |
| Q5T160                                           | Probable arginine--tRNA ligase, mitochondrial                                                                                                                                                                                                                                                                                                                                                                     | <i>RARS2</i>          | 2,92549 | 3,32649 |
| Q15751                                           | Probable E3 ubiquitin-protein ligase HERC1                                                                                                                                                                                                                                                                                                                                                                        | <i>HERC1</i>          | 2,92195 | 3,60025 |
| Q92973                                           | Transportin-1                                                                                                                                                                                                                                                                                                                                                                                                     | <i>TNPO1</i>          | 2,92082 | 3,08836 |
| P30508;Q29960;Q07000;P30505;Q9TNN7;P30504;P30501 | HLA class I histocompatibility antigen, Cw-12 alpha chain;HLA class I histocompatibility antigen, Cw-16 alpha chain;HLA class I histocompatibility antigen, Cw-15 alpha chain;HLA class I histocompatibility antigen, Cw-8 alpha chain;HLA class I histocompatibility antigen, Cw-5 alpha chain;HLA class I histocompatibility antigen, Cw-4 alpha chain;HLA class I histocompatibility antigen, Cw-2 alpha chain | <i>HLA-C</i>          | 2,92033 | 2,50506 |
| P33527                                           | Multidrug resistance-associated protein 1                                                                                                                                                                                                                                                                                                                                                                         | <i>ABCC1</i>          | 2,87818 | 2,49586 |
| P05534;P30447                                    | HLA class I histocompatibility antigen, A-24 alpha chain;HLA class I histocompatibility antigen, A-23 alpha chain                                                                                                                                                                                                                                                                                                 | <i>HLA-A</i>          | 2,84853 | 3,9893  |
| Q9Y4R8                                           | Telomere length regulation protein TEL2 homolog                                                                                                                                                                                                                                                                                                                                                                   | <i>TELO2</i>          | 2,84767 | 3,78873 |
| Q92621                                           | Nuclear pore complex protein Nup205                                                                                                                                                                                                                                                                                                                                                                               | <i>NUP205</i>         | 2,77102 | 2,00909 |
| Q6UX53                                           | Methyltransferase-like protein 7B                                                                                                                                                                                                                                                                                                                                                                                 | <i>METTL7B</i>        | 2,76825 | 2,28236 |
| Q96JJ7                                           | Protein disulfide-isomerase TMX3                                                                                                                                                                                                                                                                                                                                                                                  | <i>TMX3</i>           | 2,75799 | 5,0311  |
| O95302                                           | Peptidyl-prolyl cis-trans isomerase FKBP9                                                                                                                                                                                                                                                                                                                                                                         | <i>FKBP9</i>          | 2,75191 | 5,7395  |
| P55036                                           | 26S proteasome non-ATPase regulatory subunit 4                                                                                                                                                                                                                                                                                                                                                                    | <i>PSMD4</i>          | 2,74588 | 1,63303 |
| Q8N4Q1                                           | Mitochondrial intermembrane space import and assembly protein 40                                                                                                                                                                                                                                                                                                                                                  | <i>CHCHD4</i>         | 2,73883 | 4,89078 |
| Q9H490                                           | Phosphatidylinositol glycan anchor biosynthesis class U protein                                                                                                                                                                                                                                                                                                                                                   | <i>PIGU</i>           | 2,73568 | 2,62799 |
| Q13617                                           | Cullin-2                                                                                                                                                                                                                                                                                                                                                                                                          | <i>CUL2</i>           | 2,72629 | 3,55656 |
| Q08AM6                                           | Protein VAC14 homolog                                                                                                                                                                                                                                                                                                                                                                                             | <i>VAC14</i>          | 2,69271 | 5,37085 |
| Q8IZV5                                           | Retinol dehydrogenase 10                                                                                                                                                                                                                                                                                                                                                                                          | <i>RDH10</i>          | 2,62522 | 1,57007 |
| Q9UM00                                           | Transmembrane and coiled-coil domain-containing protein 1                                                                                                                                                                                                                                                                                                                                                         | <i>TMCO1</i>          | 2,61709 | 1,97214 |
| Q13315                                           | Serine-protein kinase ATM                                                                                                                                                                                                                                                                                                                                                                                         | <i>ATM</i>            | 2,50435 | 3,18972 |
| Q8IXM3                                           | 39S ribosomal protein L41, mitochondrial                                                                                                                                                                                                                                                                                                                                                                          | <i>MRPL41</i>         | 2,4758  | 1,65053 |
| Q9HCN8                                           | Stromal cell-derived factor 2-like protein 1                                                                                                                                                                                                                                                                                                                                                                      | <i>SDF2L1</i>         | 2,41969 | 4,67022 |
| Q14517                                           | Protocadherin Fat 1;Protocadherin Fat 1, nuclear form                                                                                                                                                                                                                                                                                                                                                             | <i>FAT1</i>           | 2,39691 | 4,14644 |
| Q13619                                           | Cullin-4A                                                                                                                                                                                                                                                                                                                                                                                                         | <i>CUL4A</i>          | 2,37824 | 3,72551 |
| O00567                                           | Nucleolar protein 56                                                                                                                                                                                                                                                                                                                                                                                              | <i>NOP56</i>          | 2,3765  | 2,28444 |
| Q9Y6D6                                           | Brefeldin A-inhibited guanine nucleotide-exchange protein 1                                                                                                                                                                                                                                                                                                                                                       | <i>ARFGEF1</i>        | 2,3472  | 2,70252 |
| Q12797                                           | Aspartyl/asparaginyl beta-hydroxylase                                                                                                                                                                                                                                                                                                                                                                             | <i>ASPH</i>           | 2,31702 | 4,41349 |
| O00165                                           | HCLS1-associated protein X-1                                                                                                                                                                                                                                                                                                                                                                                      | <i>HAX1</i>           | 2,30784 | 3,67671 |
| P12235                                           | ADP/ATP translocase 1                                                                                                                                                                                                                                                                                                                                                                                             | <i>SLC25A4</i>        | 2,3025  | 3,10851 |
| Q9UBB4                                           | Ataxin-10                                                                                                                                                                                                                                                                                                                                                                                                         | <i>ATXN10</i>         | 2,28645 | 2,79558 |
| O15397                                           | Importin-8                                                                                                                                                                                                                                                                                                                                                                                                        | <i>IPO8</i>           | 2,27648 | 2,67801 |
| P53007                                           | Tricarboxylate transport protein, mitochondrial                                                                                                                                                                                                                                                                                                                                                                   | <i>SLC25A1</i>        | 2,27146 | 3,65107 |
| O14925;Q5SRD1                                    | Mitochondrial import inner membrane translocase subunit Tim23;Putative mitochondrial import inner membrane translocase subunit Tim23B                                                                                                                                                                                                                                                                             | <i>TIMM23;TIMM23B</i> | 2,26358 | 2,51422 |

**SUPPLEMENTARY INFORMATION: The role of glycosyltransferase enzyme GCNT3 in colon and ovarian cancer prognosis and chemoresistance**

|        |                                                               |               |         |         |
|--------|---------------------------------------------------------------|---------------|---------|---------|
| Q96A33 | Coiled-coil domain-containing protein 47                      | <i>CCDC47</i> | 2,2498  | 3,14363 |
| P49959 | Double-strand break repair protein MRE11A                     | <i>MRE11A</i> | 2,24556 | 1,40589 |
| Q8WUJ3 | Cell migration-inducing and hyaluronan-binding protein        | <i>CEMIP</i>  | 2,19967 | 3,06834 |
| Q13098 | COP9 signalosome complex subunit 1                            | <i>GPS1</i>   | 2,16271 | 2,46644 |
| Q9Y5M8 | Signal recognition particle receptor subunit beta             | <i>SRPRB</i>  | 2,09703 | 3,14697 |
| Q9P2R7 | Succinyl-CoA ligase [ADP-forming] subunit beta, mitochondrial | <i>SUCLA2</i> | 2,04178 | 3,33813 |
| Q8WUY1 | Protein THEM6                                                 | <i>THEM6</i>  | 2,02123 | 1,49977 |
| Q96AY3 | Peptidyl-prolyl cis-trans isomerase FKBP10                    | <i>FKBP10</i> | 1,97278 | 1,3684  |
| Q14393 | Growth arrest-specific protein 6                              | <i>GAS6</i>   | 1,86818 | 3,72892 |
| Q13217 | DnaJ homolog subfamily C member 3                             | <i>DNAJC3</i> | 1,71242 | 3,55121 |
| O60488 | Long-chain-fatty-acid--CoA ligase 4                           | <i>ACSL4</i>  | 1,52078 | 2,26157 |
| Q96HE7 | ERO1-like protein alpha                                       | <i>ERO1L</i>  | 1,39717 | 1,49019 |
| Q8WVX9 | Fatty acyl-CoA reductase 1                                    | <i>FAR1</i>   | 1,38572 | 3,10168 |

**Supplementary Table 6. Gene ontology (GO) terms obtained from proteomic study of GCNT3 interactors.**

| Items      | Items_Details                           | Support | List size | Reference Support | Reference size | Hyp       | Hyp_c    | Genes                                                                                                                                                                                                                                                                                                                                                                                                                                                                                                                                                                                                                                                                                                                    |
|------------|-----------------------------------------|---------|-----------|-------------------|----------------|-----------|----------|--------------------------------------------------------------------------------------------------------------------------------------------------------------------------------------------------------------------------------------------------------------------------------------------------------------------------------------------------------------------------------------------------------------------------------------------------------------------------------------------------------------------------------------------------------------------------------------------------------------------------------------------------------------------------------------------------------------------------|
| GO:0044267 | cellular protein metabolic process (BP) | 105     | 718       | 284               | 34208          | 8,92E-102 | 1,34E-98 | TUBA1C,RPL10,TUBA1A,UGGT2,RPS16,RPN2,RPL12,RPS14,RPL3,RPL36,RPS26,RPL5,RPL11,RPS25,EEF2,TUBA4A,CCT4,RPS13,RPL36A,CCT2,RPL7,RPL32,RPL7A,EEF1G,RPS7,TUBB2B,RPL37A,RPS15,DPM1,RPL23,RPL15,RPL28,RPL4,RPL13,PDIA3,RPS19,EIF3C,PABPC1,RPS9,CCT6A,UBA52,RPSA,TUBB2A,GAS6,TUBB2C,EEF1A1,RPS23,RPS4X,HSPD1,CCT5,RPL18A,EIF5A2,RPS18,RPS24,TCP1,EIF4A1,EIF5A,RPS12,RPS2,RPL38,RPL22,RPS11,STT3A,RPL24,PRESB,RPL35,CCT8,RPL27,SEC13,GANAB,RPL35A,PIGU,CCT3,DDOST,RPL18,RPS5,RPL9,EEF1B2,CALR,RPL13A,UGGT1,RPL30,ALG1,CANX,RPL21,TUBB3,RPLP0,RPN1,RPS20,RPL6,RPLP2,RPS8,RPL8,RPL17,CCT7,RPS27,RPS3,RPS3A,RPL27A,RPL29,RPL4,RPL23A,RPS6,RPL10A,RPS15A                                                                                |
| GO:0016071 | mRNA metabolic process (BP)             | 95      | 718       | 223               | 34208          | 3,99E-99  | 2,99E-96 | RPL10,TNPO1,RPS16,PSMA2,HNRNPDP,RPL12,RPS14,RPL3,RPL36,TNKS1BP1,PSMC2,RPS26,RPL5,RPL11,RPS25,PSMC5,PCBP1,RPS13,CNOT1,RPL36A,RPL7,RPL32,UBB,RPL7A,PSMA7,PSMD11,PABPC3,RPS7,RPL37A,RPS15,RPL23,PCBP2,RPL15,RPL28,HSPB1,RPL14,RPL13,RPS19,PABPC1,PSMD6,RPS9,UBA52,RPSA,YVHAZ,RPS23,PSMD4,RPS4X,RPL18A,HSPA8,PSMD8,RPS18,RPS24,PP2R1A,PSMD12,EIF4A1,UBC,RPS12,RPS2,RPL38,RPL22,PSMC3,RPS11,RPL24,RPL35,RPL27,RPL35A,RPL18,RPS5,RPL9,RPL13A,XPO1,RPL30,RPL21,RPLP0,RPS20,RPL6,RPLP2,RPS8,UPF1,PSMD2,RPL8,RPL17,RPS27,RPS3,PSMA4,RPS3A,HSPA1A,RPL27A,RPL29,RPL4,RPL23A,RPS6,RPL10A,RPS15A,PSMD3                                                                                                                                |
| GO:0006414 | translational elongation (BP)           | 70      | 718       | 93                | 34208          | 2,78E-98  | 1,39E-95 | RPL10,RPS16,RPL12,RPS14,RPL3,RPL36,HNRNPC,RPS26,RPL5,RPL11,RPS25,TRIM28,EEF2,HNRNPK,HNRNPF,PCBP1,GARS,DARS,RPS13,SRSF3,RPL36A,SNRPE,KARS,RPL7,RPL32,RPL7A,EEF1G,RPS7,RPL37A,RPS15,RPL23,PCBP2,RPL15,RPL28,TARS,RPL14,RPL13,PRPF8,RBMX,SNRNP200,RPS19,EIF3C,PABPC1,RPS9,UBA52,SRSF7,SF3B3,SMC1A,AIMP2,RPSA,SRSF1,HNRNPH2,EEF1A1,RPS23,PTBP1,RPS4X,RPL18A,RPS18,SF3B1,RPS24,EIF4A1,RPS12,RPS2,RPL38,SNRPF,RPL22,RPS11,TCEB1,RPL24,RPL35,TCEB2,RPL27,EPRS,DHX9,RPL35A,HNRNPU,SNRNP1,FUS,RAES2,RPL18,RPS5,RPL9,EEF1B2,THOC4,RPL13A,LARS,RPL30,RARS,HNRNPM,HNRNPA2B1,EFTUD2,RPL21,RPLP0,RPS20,RPL6,YBX1,MARS,RPLP2,RPS8,HNRNPUL1,RPL8,RPL17,HNRNPH1,RPS27,RPS3,RPS3A,RPL27A,RPL29,HNRNPA1,IARS,RPL4,RPL23A,RPS6,RPL10A,RPS15A |
| GO:0010467 | gene expression (BP)                    | 116     | 718       | 408               | 34208          | 2,18E-97  | 8,18E-95 | RPL10,TNPO1,RPS16,PSMA2,HNRNPDP,RPL12,RPS14,RPL3,RPL36,TNKS1BP1,PSMC2,RPS26,RPL5,RPL11,RPS25,PSMC5,PCBP1,RPS13,CNOT1,RPL36A,SNRPE,RPL7,RPL32,UBB,RPL7A,PSMA7,CNP,PSMD11,RPS7,RPL37A,RPS15,RPL23,RPL15,RPL28,HSPB1,RPL14,RPL13,RPS19,PABPC1,PSMD6,RPS9,UBA52,RPSA,YVHAZ,RPS23,GEMIN4,PSMD4,RPS4X,RPL18A,HSPA8,PSMD8,RPS18,RPS24,PP2R1A,PSMD12,EIF4A1,UBC,RPS12,RPS2,RPL38,SNRPF,RPL22,PSMC3,RPS11,RPL24,RPL35,RPL27,RPL35A,SNRNP1,RPL18,RPS5,RPL9,RPL13A,XPO1,RPL30,RPL21,RPLP0,RPS20,RPL6,RPLP2,RPS8,UPF1,PSMD2,RPL8,RPL17,RPS27,RPS3,PSMA4,RPS3A,HSPA1A,RPL27A,RPL29,RPL4,RPL23A,RPS6,RPL10A,RPS15A,PSMD3                                                                                                               |
| GO:0016070 | RNA metabolic process (BP)              | 97      | 718       | 257               | 34208          | 5,78E-95  | 1,73E-92 | RPL10,KPNB1,RPS16,RPL12,RPS14,RPL3,RPL36,RPS26,RPL5,RPL11,RPS25,RPS13,RPL36A,RPL7,RPL32,RPL7A,RPS7,RPL37A,RPS15,RPL23,RPL15,RPL28,RPL14,RPL13,RPS19,RPS9,UBA52,RPSA,RPS23,RPS4X,RPL18A,RPS18,RPS24,RPS12,RPS2,RPL38,RPL22,RPS11,RPL24,RPL35,RPL27,RPL35A,SLC25A6,RPL18,RPS5,RPL9,RPL13A,XPO1,RPL30,RPL21,RPLP0,RPS20,RPL6,RPLP2,RPS8,RPL8,RPL17,RPS27,RPS3,RPS3A,RPL27A,RPL29,RPL4,RPL23A,RPS6,RPL10A,RPS15A,PSMD3                                                                                                                                                                                                                                                                                                       |
| GO:0019058 | viral infectious cycle (BP)             | 67      | 718       | 91                | 34208          | 6,31E-93  | 1,58E-90 | RPL10,RPS16,RPL12,RPS14,RPL3,RPL36,RPS26,RPL5,RPL11,RPS25,RPS13,RPL36A,RPL7,RPL32,RPL7A,RPS7,RPL37A,RPS15,RPL23,RPL15,RPL28,RPL14,RPL13,RPS19,RPS9,UBA52,RPSA,RPS23,RPS4X,RPL18A,RPS18,RPS24,RPS12,RPS2,RPL38,RPL22,RPS11,RPL24,RPL35,RPL27,RPL35A,SLC25A6,RPL18,RPS5,RPL9,RPL13A,XPO1,RPL30,RPL21,RPLP0,RPS20,RPL6,RPLP2,RPS8,RPL8,RPL17,RPS27,RPS3,RPS3A,RPL27A,RPL29,RPL4,RPL23A,RPS6,RPL10A,RPS15A                                                                                                                                                                                                                                                                                                                   |
| GO:0019083 | viral transcription (BP)                | 64      | 718       | 82                | 34208          | 9,88E-92  | 2,12E-89 | RPL10,RPS16,RPL12,RPS14,RPL3,RPL36,RPS26,RPL5,RPL11,RPS25,RPS13,RPL36A,RPL7,RPL32,RPL7A,RPS7,RPL37A,RPS15,RPL23,RPL15,RPL28,RPL14,RPL13,RPS19,RPS9,UBA52,RPSA,RPS23,RPS4X,RPL18A,RPS18,RPS24,RPS12,RPS2,RPL38,RPL22,RPS11,RPL24,RPL35,RPL27,RPL35A,RPL18,RPS5,RPL9,RPL13A,RPL30,RPL21,RPLP0,RPS20,RPL6,RPLP2,RPS8,RPL8,RPL17,RPS27,RPS3,RPS3A,RPL27A,RPL29,RPL4,RPL23A,RPS6,RPL10A,RPS15A                                                                                                                                                                                                                                                                                                                                |
| GO:0016032 | viral reproduction (BP)                 | 102     | 718       | 329               | 34208          | 9,76E-90  | 1,83E-87 | RPL10,KPNB1,RPS16,PSMA2,XRCC6,RPL12,RPS14,RPL3,RPL36,PSMC2,RPS26,RPL5,RPL11,RPS25,SLC25A4,PPIA,PSMC5,RPS13,RPL36A,RPL7,RPL32,UBB,RPL7A,PSMA7,PSMD11,RPS7,RPL37A,RPS15,RPL23,NUP210,RPL15,RPL28,RPL14,RPL13,RPS19,PSMD6,RPS9,UBA52,RPSA,RPS23,PSMD4,RPS4X,RPL18A,PSMD8,RPS18,RPS24,AP1B1,AP1G1,PSMD12,UBC,RPS12,RPS2,RPL38,RPL22,PSMC3,RPS11,TCEB1,RPL24,RPL35,TCEB2,RPL27,RPL35A,SKP1,NUP160,SLC25A6,RPL18,RPS5,RPL9,NUP205,RPL13A,XPO1,NUP93,RPL30,AP2B1,RPL21,RPLP0,RPS20,RPL6,XRCC5,RPLP2,BANF1,RPS8,CUL5,NUP85,PSMD2,RPL8,RPL17,RPS27,RPS3,AP2A1,PSMA4,RPS3A,RPL27A,RPL29,SLC25A5,RPL4,LCK,RPL23A,RPS6,RPL10A,RPS15A,PSMD3                                                                                           |
| GO:0006415 | translational termination (BP)          | 64      | 718       | 87                | 34208          | 9,86E-89  | 1,64E-86 | RPL10,RPS16,RPL12,RPS14,RPL3,RPL36,RPS26,RPL5,RPL11,RPS25,RPS13,RPL36A,RPL7,RPL32,RPL7A,RPS7,RPL37A,RPS15,RPL23,RPL15,RPL28,RPL14,RPL13,RPS19,RPS9,UBA52,RPSA,RPS23,RPS4X,RPL18A,RPS18,RPS24,RPS12,RPS2,RPL38,RPL22,RPS11,RPL24,RPL35,RPL27,RPL35A,RPL18,RPS5,RPL9,RPL13A,RPL30,RPL21,RPLP0,RPS20,RPL6,RPLP2,RPS8,RPL8,RPL17,RPS27,RPS3,RPS3A,RPL27A,RPL29,RPL4,RPL23A,RPS6,RPL10A,RPS15A                                                                                                                                                                                                                                                                                                                                |
| GO:0031018 | endocrine pancreas development (BP)     | 64      | 718       | 121               | 34208          | 1,26E-74  | 1,90E-72 | RPL10,RPS16,RPL12,RPS14,RPL3,RPL36,RPS26,RPL5,RPL11,RPS25,RPS13,RPL36A,RPL7,RPL32,RPL7A,RPS7,RPL37A,RPS15,RPL23,RPL15,RPL28,RPL14,RPL13,RPS19,RPS9,UBA52,RPSA,RPS23,RPS4X,RPL18A,RPS18,RPS24,RPS12,RPS2,RPL38,RPL22,RPS11,RPL24,RPL35,RPL27,RPL35A,RPL18,RPS5,RPL9,RPL13A,RPL30,RPL21,RPLP0,RPS20,RPL6,RPLP2,RPS8,RPL8,RPL17,RPS27,RPS3,RPS3A,RPL27A,RPL29,RPL4,RPL23A,RPS6,RPL10A,RPS15A                                                                                                                                                                                                                                                                                                                                |



**SUPPLEMENTARY INFORMATION: The role of glycosyltransferase enzyme GCNT3 in colon and ovarian cancer prognosis and chemoresistance**

|            |                                                                                                                    |    |     |     |       |          |          |                                                                                                                                                                                                                                                                                                                                                                                                                                                                                                               |
|------------|--------------------------------------------------------------------------------------------------------------------|----|-----|-----|-------|----------|----------|---------------------------------------------------------------------------------------------------------------------------------------------------------------------------------------------------------------------------------------------------------------------------------------------------------------------------------------------------------------------------------------------------------------------------------------------------------------------------------------------------------------|
| GO:0006412 | translation<br>(BP)                                                                                                | 80 | 718 | 241 | 34208 | 5,81E-73 | 7,93E-71 | RPL10,RPS16,RPL12,RPS14,RPL3,RPL36,RPS26,RPL5,RPL11,RPS25,EEF2,DAR S,RPS13,RPL36A,RPL7,RPL32,RPL7A,EEF1G,RPS7,RPL37A,RPS15,RPL23,RPL1 5,RPL28,TARS,RPL14,RPL13,RPS19,EIF3C,PABPC1,RPS9,UBA52,RPSA,EEF1A1 ,RPS23,RPL22L1,RPS4X,RPL18A,RPL18,RPS24,PABPC4,EIF4A1,RPS12,RPS2,R PL38,RPL22,RPS11,SLC25A10,RPL24,RPL35,RPL27,RPL35A,RPL18,RPS5,RPL9 ,EEF1B2,RPL13A,RPL30,IGF2BP3,RPL21,RPLP0,MRPL41,GCN1L1,RPS20,RPL6 ,RPLP2,RPS8,RPL8,RPL17,RPS27,RPS3,RPL36AL,RPS3A,RPL27A,RPL29,RPL4, RPL23A,RPS6,RPL10A,RPS15A |
| GO:0006334 | nucleosome<br>assembly (BP)                                                                                        | 36 | 718 | 102 | 34208 | 2,12E-34 | 2,65E-32 | HIST1H2BM,HIST1H2BC,H2AFZ,HIST1H1E,H2AFJ,NPM1,HIST1H2BD,HIST1H 2AD,HIST3H2A,HIST2H2AC,HIST1H2AG,HIST1H2AH,HIST1H2BH,H2AFV,HIST 3H3,H3F3A,HIST2H2AA3,HIST1H1C,HIST1H2BN,HIST1H2BK,HIST3H2BB,RUV BL1,HIST1H2AJ,NAP1L1,HIST1H2BO,HIST1H1D,HIST1H2BA,HIST2H2BF,H2AF X,HIST1H2AA,HIST1H4A,HIST1H2BJ,HIST1H2BB,HIST1H2AB,HIST2H2BE,HIST 1H2AC                                                                                                                                                                       |
| GO:0006457 | protein folding<br>(BP)                                                                                            | 40 | 718 | 182 | 34208 | 4,79E-29 | 5,53E-27 | TUBA1C,TUBA1A,UGGT2,PDIA6,DNAJA1,PPIA,TUBA4A,CCT4,CCT2,RUVBL2, TUBB2B,HSP90AA1,PDIA3,CCT6A,DNAJA3,TUBB2A,TUBB2C,CCT5,HSPA8,BA G2,TCP1,PPIB,DNAJA2,FKBP9,HSPA9,CCT8,GANAB,FKBP10,CCT3,RP2,CALR, UGGT1,CANX,DNAJB11,TUBB3,DNAJC3,HSP90AB1,ERO1L,CCT7,HSP90B1                                                                                                                                                                                                                                                    |
| GO:0008380 | RNA splicing<br>(BP)                                                                                               | 45 | 718 | 267 | 34208 | 2,62E-27 | 2,80E-25 | HNRNPD,LGALS3,HNRNPA1L2,HNRNPC,HNRNPK,HNRNPF,PCBP1,SRSF3,SNR PE,PCBP2,PRPF8,RBMX,SNRNP200,PABPC1,SRSF7,SF3B3,SMC1A,SRSF1,HNR NPH2,GEMIN4,DHX15,PTBP1,NONO,SF3B1,DDX5,PPP2R1A,SNRPF,DHX9,ST RAP,HNRNPU,SNRPD1,FUS,THOC4,HNRNPM,HNRNPA2B1,EFTUD2,DDX39A, YBX1,RBMXL1,PRPF39,SFPQ,HNRNPUL1,HNRNPH1,SYNCRIP,HNRNPA1                                                                                                                                                                                               |
| GO:0000398 | nuclear mRNA<br>splicing, via<br>spliceosome<br>(BP)                                                               | 35 | 718 | 167 | 34208 | 7,95E-25 | 7,95E-23 | HNRNPD,HNRNPC,HNRNPK,HNRNPF,PCBP1,SRSF3,SNRPE,PCBP2,PRPF8,RB MX,SNRNP200,PABPC1,SRSF7,SF3B3,SMC1A,SRSF1,HNRNPH2,PTBP1,SF3B1 ,DDX5,SNRPF,DHX9,HNRNPU,SNRPD1,FUS,THOC4,HNRNPM,HNRNPA2B1,E FTUD2,DDX39A,YBX1,HNRNPUL1,HNRNPH1,SYNCRIP,HNRNPA1                                                                                                                                                                                                                                                                    |
| GO:0044419 | interspecies<br>interaction<br>between<br>organisms (BP)                                                           | 46 | 718 | 328 | 34208 | 2,23E-24 | 2,09E-22 | TNPO1,KPNB1,IPO7,C1QBP,PSMC2,KRT18,SLC25A4,HNRNPK,PPIA,NPM1,KA RS,YWHAE,VAC14,PSMA7,HLA-A,DDDB1,PDCC6IP,IPO5,CUL2,DYNLL1,HSPD1,HSPA8,GNB2L1,SCRIB,PSMC3,T CEB1,COPB1,SLC25A6,VIM,HLA-C,THOC4,XPO1,RPLP0,BANF1,CUL5,TFRC,SYNCRIP,VDAC1,PSMA4,HNRNPA1 ,SLC25A5,LCK,DDX3X,CUL4A,ITGB1,ABCE1                                                                                                                                                                                                                      |
| GO:0000278 | mitotic cell<br>cycle (BP)                                                                                         | 38 | 718 | 304 | 34208 | 1,34E-18 | 1,18E-16 | TUBA1A,PSMA2,DYNC1H1,PSMC2,TUBB,TUBA4A,PSMC5,POLD4,YWHAE,UB B,PSMA7,CDK1,PSMD11,HSP90AA1,PRKACA,PSMD6,UBA52,SMC1A,TUBB2 C,DYNLL1,PSMD4,PSMD8,PPP2R1A,PSMD12,UBC,CDC16,RFC5,PSMC3,SEC1 3,SKP1,NUP160,XPO1,NUP85,PSMD2,MCM3,RPS27,PSMA4,PSMD3                                                                                                                                                                                                                                                                   |
| GO:0002474 | antigen<br>processing and<br>presentation<br>of peptide<br>antigen via<br>MHC class I<br>(BP)                      | 23 | 718 | 94  | 34208 | 2,20E-18 | 1,83E-16 | PSMA2,PSMC2,PSMC5,UBB,PSMA7,PSMD11,PDIA3,HLA-A,PSMD6,UBA52,PSMD4,PSMD8,ERAP1,PSMD12,UBC,PSMC3,SEC13,HLA-C,CALR,CANX,PSMD2,PSMA4,PSMD3                                                                                                                                                                                                                                                                                                                                                                         |
| GO:0051084 | 'de novo'<br>posttranslational<br>protein<br>folding (BP)                                                          | 16 | 718 | 36  | 34208 | 5,95E-18 | 4,70E-16 | TUBA1C,TUBA1A,TUBA4A,CCT4,CCT2,TUBB2B,CCT6A,TUBB2A,TUBB2C,CCT 5,TCP1,CCT8,CCT3,UGGT1,TUBB3,CCT7                                                                                                                                                                                                                                                                                                                                                                                                               |
| GO:0051437 | positive<br>regulation of<br>ubiquitin-<br>protein ligase<br>activity<br>involved in<br>mitotic cell<br>cycle (BP) | 19 | 718 | 71  | 34208 | 3,24E-16 | 2,43E-14 | PSMA2,PSMC2,PSMC5,UBB,PSMA7,CDK1,PSMD11,PSMD6,UBA52,PSMD4,P SMD8,PSMD12,UBC,CDC16,PSMC3,SKP1,PSMD2,PSMA4,PSMD3                                                                                                                                                                                                                                                                                                                                                                                                |
| GO:0006200 | ATP catabolic<br>process (BP)                                                                                      | 20 | 718 | 82  | 34208 | 3,90E-16 | 2,79E-14 | ACTC1,PSMC2,ATP5B,MYH14,PSMC5,ATP2A2,RUVBL2,HSP90AA1,PSMD6,H SPA5,ATP6VOD1,MYH9,HSPD1,HSPA8,ATP5C1,MSH2,ATP1A1,ATP5A1,MAC F1,ABCC1                                                                                                                                                                                                                                                                                                                                                                            |
| GO:0000075 | cell cycle<br>checkpoint<br>(BP)                                                                                   | 24 | 718 | 131 | 34208 | 4,95E-16 | 3,38E-14 | PSMA2,PSMC2,PSMC5,UBB,PSMA7,CDK1,PSMD11,DDB1,PSMD6,UBA52,S MC1A,PSMD4,PSMD8,PSMD12,UBC,CDC16,RFC5,PSMC3,PSMD2,MCM3,M RE11A,ATM,PSMA4,PSMD3                                                                                                                                                                                                                                                                                                                                                                    |
| GO:0000082 | G1/S transition<br>of mitotic cell<br>cycle (BP)                                                                   | 25 | 718 | 145 | 34208 | 5,42E-16 | 3,54E-14 | PSMA2,PSMC2,PSMC5,UBB,PSMA7,CDK1,PSMD11,PPP6C,PSMD6,UBA52,C UL2,PSMD4,PSMD8,PSMD12,UBC,PSMC3,SKP1,CAMK2D,CUL5,PSMD2,MC M3,PSMA4,CUL4A,PSMD3,ITGB1                                                                                                                                                                                                                                                                                                                                                             |
| GO:0006928 | cellular<br>component<br>movement<br>(BP)                                                                          | 21 | 718 | 95  | 34208 | 6,18E-16 | 3,87E-14 | ACTR2,TUBB,DSTN,ARPC2,ARPC1B,HSPB1,CAPZA1,ACTR3,TUBB2C,CALD1,M YH9,TPM4,CAPZB,TPM1,ACTG1,ARPC3,VIM,CAPZA2,ARPC5,TPM3,MACF1                                                                                                                                                                                                                                                                                                                                                                                    |
| GO:0051439 | regulation of<br>ubiquitin-<br>protein ligase<br>activity<br>involved in<br>mitotic cell<br>cycle (BP)             | 19 | 718 | 75  | 34208 | 9,92E-16 | 5,95E-14 | PSMA2,PSMC2,PSMC5,UBB,PSMA7,CDK1,PSMD11,PSM D6,UBA52,PSMD4,PSMD8,PSMD12,UBC,CDC16,PSMC3,S KP1,PSMD2,PSMA4,PSMD3                                                                                                                                                                                                                                                                                                                                                                                               |

**SUPPLEMENTARY INFORMATION: The role of glycosyltransferase enzyme GCNT3 in colon and ovarian cancer prognosis and chemoresistance**

|            |                                                                                                     |    |     |     |       |          |          |                                                                                                                                                                                                                                                                                        |
|------------|-----------------------------------------------------------------------------------------------------|----|-----|-----|-------|----------|----------|----------------------------------------------------------------------------------------------------------------------------------------------------------------------------------------------------------------------------------------------------------------------------------------|
| GO:0031145 | anaphase-promoting complex-dependent proteasomal ubiquitin-dependent protein catabolic process (BP) | 19 | 718 | 80  | 34208 | 3,64E-15 | 2,10E-13 | PSMA2,PSMC2,PSMC5,UBB,PSMA7,CDK1,PSMD11,PSMD6,UBA52,PSMD4,PSMD8,PSMD12,UBC,CDC16,PSMC3,SKP1,PSMD2,PSMA4,PSMD3                                                                                                                                                                          |
| GO:0051436 | negative regulation of ubiquitin-protein ligase activity involved in mitotic cell cycle (BP)        | 17 | 718 | 65  | 34208 | 1,81E-14 | 1,00E-12 | PSMA2,PSMC2,PSMC5,UBB,PSMA7,PSMD11,PSMD6,UBA52,PSMD4,PSMD8,PSMD12,UBC,CDC16,PSMC3,PSMD2,PSMA4,PSMD3                                                                                                                                                                                    |
| GO:0006977 | DNA damage response, signal transduction by p53 class mediator resulting in cell cycle arrest (BP)  | 17 | 718 | 66  | 34208 | 2,39E-14 | 1,28E-12 | PSMA2,PSMC2,PSMC5,UBB,PSMA7,PSMD11,PSMD6,UBA52,PSMD4,PSMD8,PSMD12,UBC,PSMC3,PSMD2,ATM,PSMA4,PSMD3                                                                                                                                                                                      |
| GO:0006915 | apoptotic process (BP)                                                                              | 46 | 718 | 594 | 34208 | 4,09E-14 | 2,12E-12 | KPNB1,PSMA2,ACTC1,PLEC,SRA1,PSMC2,TJP2,PSMC5,YWHAE,UBB,PSMA7,CDK1,PSMD11,DSP,LMNB1,SPTAN1,PDCD6IP,PSMD6,UBA52,TJP1,CASP14,RHOT1,AIMP2,CSE1L,DYNLL2,DNAJA3,DYNLL1,PSMD4,PSMD8,PSMD12,LGALS1,UBC,CTNBN1,PSMC3,CLPTM1L,LMNA,SLC25A6,VIAM,CYFIP2,MRPL41,PSMD2,SQSTM1,VDAC1,PSMA4,LCK,PSMD3 |
| GO:0000084 | S phase of mitotic cell cycle (BP)                                                                  | 20 | 718 | 112 | 34208 | 2,28E-13 | 1,14E-11 | PSMA2,PSMC2,PSMC5,POLD4,UBB,PSMA7,PSMD11,PSMD6,UBA52,PSMD4,PSMD8,PSMD12,UBC,RFC5,PSMC3,SKP1,PSMD2,MCM3,PSMA4,PSMD3                                                                                                                                                                     |
| GO:0000216 | M/G1 transition of mitotic cell cycle (BP)                                                          | 17 | 718 | 78  | 34208 | 4,71E-13 | 2,28E-11 | PSMA2,PSMC2,PSMC5,UBB,PSMA7,PSMD11,PSMD6,UBA52,PSMD4,PSMD8,PSMD12,UBC,PSMC3,PSMD2,MCM3,PSMA4,PSMD3                                                                                                                                                                                     |
| GO:0006886 | intracellular protein transport (BP)                                                                | 25 | 718 | 196 | 34208 | 6,76E-13 | 3,17E-11 | TMED10,TNPO1,IPO7,ARCN1,IPO4,NPM1,IPO8,COPA,TIMM23,IPO5,CSE1L,MYO6,AP1B1,AP1G1,IPO9,SEC13,CLTC,COPB1,XPO5,SSR4,COPB2,XPO1,AP2B1,XPOT,AP2A1                                                                                                                                             |
| GO:0042981 | regulation of apoptotic process (BP)                                                                | 25 | 718 | 205 | 34208 | 1,87E-12 | 8,51E-11 | PSMA2,PSMC2,DAPK3,PSMC5,PHB,UBB,PSMA7,PSMD11,PSMD6,UBA52,PSMD4,PSMD8,PPP2R1A,PSMD12,LGALS1,UBC,PSMC3,LMNA,CALR,PRDX2,ACTN1,PSMD2,PSMA4,ACTN4,PSMD3                                                                                                                                     |
| GO:0006521 | regulation of cellular amino acid metabolic process (BP)                                            | 13 | 718 | 51  | 34208 | 3,15E-11 | 1,39E-09 | PSMA2,PSMC2,PSMC5,PSMA7,PSMD11,PSMD6,PSMD4,PSMD8,PSMD12,PSMC3,PSMD2,PSMA4,PSMD3                                                                                                                                                                                                        |
| GO:0034641 | cellular nitrogen compound metabolic process (BP)                                                   | 23 | 718 | 200 | 34208 | 4,82E-11 | 2,07E-09 | PSMA2,ALDH18A1,PSMC2,PSMC5,PSMA7,PSMD11,PSMD6,SLC1A5,PSMD4,SLC38A2,OGDH,PSMD8,PSMD12,SLC3A2,PSMC3,DLST,GCDH,HSD17B10,PSMD2,PSMA4,GSTZ1,SLC38A1,PSMD3                                                                                                                                   |
| GO:0000209 | protein polyubiquitination (BP)                                                                     | 17 | 718 | 107 | 34208 | 9,90E-11 | 4,12E-09 | PSMA2,PSMC2,PSMC5,UBB,PSMA7,PSMD11,PSMD6,UBA52,PSMD4,PSMD8,PSMD12,UBC,UBR5,PSMC3,PSMD2,PSMA4,PSMD3                                                                                                                                                                                     |
| GO:0043687 | post-translational protein modification (BP)                                                        | 18 | 718 | 123 | 34208 | 1,14E-10 | 4,62E-09 | UGGT2,RPN2,DPM1,PDIA3,GAS6,EIF5A2,EIF5A,STT3A,PREB,SEC13,GANAB,PIGU,DDOST,CALR,UGGT1,ALG1,CANX,RPN1                                                                                                                                                                                    |
| GO:0005975 | carbohydrate metabolic process (BP)                                                                 | 27 | 718 | 290 | 34208 | 1,38E-10 | 5,45E-09 | SLC25A1,PRPS1,PPP1CA,NUP210,ENO1,PRKACA,SLC2A1,CHID1,SLC3A2,ALDH1B1,PRKACB,SLC25A11,SLC25A10,GCNT3,GANAB,NUP160,PFKP,NUP205,GAA,NUP93,HK2,HKDC1,NUP85,PFKL,PPP1CB,SLC25A13,GAPDH                                                                                                       |

**SUPPLEMENTARY INFORMATION: The role of glycosyltransferase enzyme GCNT3 in colon and ovarian cancer prognosis and chemoresistance**

|            |                                                     |    |     |     |       |          |          |                                                                                                                                                                                                                                                                 |
|------------|-----------------------------------------------------|----|-----|-----|-------|----------|----------|-----------------------------------------------------------------------------------------------------------------------------------------------------------------------------------------------------------------------------------------------------------------|
| GO:0018279 | protein N-linked glycosylation via asparagine (BP)  | 15 | 718 | 87  | 34208 | 3,80E-10 | 1,46E-08 | UGGT2,RPN2,STT3B,DPM1,PDIA3,STT3A,PRES,SEC13,GANAB,DDOST,CALR,UGGT1,ALG1,CANX,RPN1                                                                                                                                                                              |
| GO:0051028 | mRNA transport (BP)                                 | 12 | 718 | 51  | 34208 | 5,01E-10 | 1,88E-08 | HNRNPA1L2,NUP210,MYO1C,EIF5A2,EIF5A,SEC13,NUP205,XPO1,NUP93,LRPPRC,NUP85,HNRNPA1                                                                                                                                                                                |
| GO:0006418 | tRNA aminoacylation for protein translation (BP)    | 11 | 718 | 43  | 34208 | 1,01E-09 | 3,69E-08 | GARS,DARS,KARS,TARS,AIMP2,EPRS,RARS2,LARS,RARS,MARS,IARS                                                                                                                                                                                                        |
| GO:0035338 | long-chain fatty-acyl-CoA biosynthetic process (BP) | 8  | 718 | 18  | 34208 | 1,32E-09 | 4,70E-08 | SLC25A1,FASN,HSD17B12,ACSL4,TECR,ACSL3,ELOVL5,ACSL5                                                                                                                                                                                                             |
| GO:0006281 | DNA repair (BP)                                     | 25 | 718 | 285 | 34208 | 2,28E-09 | 7,96E-08 | PARP1,XRCC6,TRIM28,POLD4,FANCI,NPM1,UBB,RUVBL2,CDK1,DDB1,UBA52,SMC1A,PSMD4,NONO,UBC,RFC5,RUVBL1,MSH2,H2AFX,XRCC5,SFPQ,UPF1,RBM14,ATM,CUL4A                                                                                                                      |
| GO:0030833 | regulation of actin filament polymerization (BP)    | 7  | 718 | 13  | 34208 | 2,68E-09 | 9,14E-08 | ARPC2,ARPC1B,ACTR3,ARPC1A,ARPC3,ARPC5L,ARPC5                                                                                                                                                                                                                    |
| GO:0006112 | energy reserve metabolic process (BP)               | 15 | 718 | 102 | 34208 | 3,77E-09 | 1,26E-07 | IQGAP1,SLC25A4,PRKACA,FASN,SLC2A1,PRKACB,ITPR2,GNB1,PRKAR2A,SLC25A6,GNAS,GNB4,ITPR3,SLC25A5,GNB2                                                                                                                                                                |
| GO:0007596 | blood coagulation (BP)                              | 32 | 718 | 457 | 34208 | 3,87E-09 | 1,26E-07 | C1QBP,PPIA,TUBA4A,ATP2A2,CFL1,PRKACA,CAPZA1,YWHAZ,HSPA5,GAS6,H3F3A,PABPC4,SLC3A2,PRKACB,ITPR2,CAPZB,SLC16A1,GNB1,CALU,ACTG1,FLNA,PRKAR2A,CAPZA2,GNAS,ITPR3,ACTN1,GNAI2,LCK,ACTN4,BSG,GNAI1,ITGB1                                                                |
| GO:0070934 | CRD-mediated mRNA stabilization (BP)                | 5  | 718 | 5   | 34208 | 4,02E-09 | 1,28E-07 | IGF2BP1,DHX9,HNRNPU,YBX1,SYNCRIP                                                                                                                                                                                                                                |
| GO:0015031 | protein transport (BP)                              | 30 | 718 | 413 | 34208 | 5,13E-09 | 1,60E-07 | SEC16A,XPO4,IPO4,RAB20,NUP210,ARF4,VPS4A,PDCD61P,MYO1C,MYH9,EIF5A2,RAB8A,EIF5A,TIMM50,TNPO3,SECE61B,PRES,IPO9,CHCHD4,NUP160,NUP205,NUP93,MYO5B,RAB6B,RAB8B,RAB6A,NUP85,SEC61A1,HSP90B1,ACTN4                                                                    |
| GO:0006986 | response to unfolded protein (BP)                   | 11 | 718 | 51  | 34208 | 7,17E-09 | 2,19E-07 | DNAJA1,HSPB1,HSP90AA1,HSPA6,HSPD1,HSPA8,HSPH1,DNAJC3,HSP90AB1,HSPA1A,SERPINH1                                                                                                                                                                                   |
| GO:0006810 | transport (BP)                                      | 37 | 718 | 604 | 34208 | 8,76E-09 | 2,63E-07 | TMED10,SLC25A1,IPO7,ARCN1,HNRNPA1L2,CYB5B,DYNC1H1,SLC25A3,ATP5B,SLC25A4,ATP2A2,UQCRC2,G3BP1,CPT1A,DYNLL2,OSBP18,DYNLL1,SORL1,ITPR2,SLC25A11,SLC25A10,NDUFA4,ATP6V1A,SLC25A22,THOC4,NUP93,XPOT,HERC1,LRPPRC,SDHA,ERO1L,ABCD3,ETFA,SLC25A13,HNRNPA1,SLC25A5,ABCC1 |
| GO:0016044 | cellular membrane organization (BP)                 | 14 | 718 | 95  | 34208 | 1,21E-08 | 3,50E-07 | ARCN1,UBB,VPS4A,COPA,UBA52,HSPA8,AP1B1,AP1G1,UBC,PRES,SEC13,CLTC,COPB1,COPB2                                                                                                                                                                                    |
| GO:0006397 | mRNA processing (BP)                                | 20 | 718 | 202 | 34208 | 1,19E-08 | 3,50E-07 | LGALS3,HNRNPA1L2,SNRPE,PRPF8,KHDRBS1,SRSF7,SF3B3,SRSF1,GEMIN4,DHX15,PTBP1,NONO,SNRPF,STRAP,HNRNPA2B1,EFTUD2,RBMXL1,PRPF39,SFPQ,HNRNPA1                                                                                                                          |
| GO:0006936 | muscle contraction (BP)                             | 14 | 718 | 96  | 34208 | 1,39E-08 | 3,94E-07 | UTRN,FLII,MYL12B,CALD1,TPM4,SNTB1,ACTG2,ASPH,MYL6B,TPM1,MYL6,ACTA2,TPM3,ACTA1                                                                                                                                                                                   |
| GO:0006096 | glycolysis (BP)                                     | 10 | 718 | 45  | 34208 | 2,56E-08 | 7,12E-07 | LDHB,PDHB,ENO1,OGDH,PDHA1,PFKP,HK2,HKDC1,PFKL,GAPDH                                                                                                                                                                                                             |
| GO:0051693 | actin filament capping (BP)                         | 7  | 718 | 17  | 34208 | 2,82E-08 | 7,56E-07 | CAPZA1,SPTAN1,SPTBN2,CAPZB,CAPZA2,SPTBN1,VIL1                                                                                                                                                                                                                   |
| GO:0030048 | actin filament-based movement (BP)                  | 7  | 718 | 17  | 34208 | 2,82E-08 | 7,56E-07 | ACTC1,MYH14,MYH10,MYO1B,MYO6,MYH9,MYO1E                                                                                                                                                                                                                         |

**SUPPLEMENTARY INFORMATION: The role of glycosyltransferase enzyme GCNT3 in colon and ovarian cancer prognosis and chemoresistance**

|            |                                                            |    |     |     |       |          |          |                                                                                                                                                                                                                                                 |
|------------|------------------------------------------------------------|----|-----|-----|-------|----------|----------|-------------------------------------------------------------------------------------------------------------------------------------------------------------------------------------------------------------------------------------------------|
| GO:0042274 | ribosomal small subunit biogenesis (BP)                    | 6  | 718 | 11  | 34208 | 3,54E-08 | 9,31E-07 | RPS16,RPS7,RPS15,RPS19,RPS24,RPS6                                                                                                                                                                                                               |
| GO:0050796 | regulation of insulin secretion (BP)                       | 12 | 718 | 74  | 34208 | 4,46E-08 | 1,15E-06 | IQGAP1,SLC25A4,CPT1A,PRKACA,SLC2A1,PRKACB,ITPR2,PRKAR2A,SLC25A6,GNAS,ITPR3,SLC25A5                                                                                                                                                              |
| GO:0006364 | rRNA processing (BP)                                       | 13 | 718 | 90  | 34208 | 5,14E-08 | 1,31E-06 | RPS16,RPL5,RPL11,RPL7,RPS7,RPS15,RPL14,RPS19,GEMIN4,RPS24,NOP56,RPL35A,RPS6                                                                                                                                                                     |
| GO:0006921 | cellular component disassembly involved in apoptosis (BP)  | 10 | 718 | 49  | 34208 | 6,12E-08 | 1,53E-06 | KPNB1,PLEC,TJP2,DSP,LMNB1,SPTAN1,TJP1,CTNNB1,LMNA,VIM                                                                                                                                                                                           |
| GO:0044255 | cellular lipid metabolic process (BP)                      | 15 | 718 | 128 | 34208 | 8,64E-08 | 2,12E-06 | SLC25A1,FHL2,ACADM,CPT1A,FASN,HSD17B12,HADHB,ACSL4,BDH1,TECR,HADHA,FAR1,ACSL3,ELOVL5,ACSL5                                                                                                                                                      |
| GO:0051258 | protein polymerization (BP)                                | 8  | 718 | 29  | 34208 | 1,05E-07 | 2,55E-06 | TUBA1C,TUBA1A,TUBB,TUBA4A,TUBB2B,TUBB2A,TUBB2C,TUBB3                                                                                                                                                                                            |
| GO:0042493 | response to drug (BP)                                      | 23 | 718 | 301 | 34208 | 1,27E-07 | 3,02E-06 | ACTC1,NES,ACADM,CDK1,CPT1A,YWHAZ,LGALS1,BDH1,CTNNB1,HADHA,MSH2,PAM,ATP1A1,CALR,GNAS,XPO1,GGH,MAP1B,MAT2A,ABCD3,LCK,ABCC1,ITGB1                                                                                                                  |
| GO:0006006 | glucose metabolic process (BP)                             | 13 | 718 | 98  | 34208 | 1,44E-07 | 3,38E-06 | SLC25A1,CPT1A,ENO1,PRKACA,PRKACB,SLC25A11,SLC25A10,PFKP,GAA,HK2,PFKL,SLC25A13,GAPDH                                                                                                                                                             |
| GO:0019432 | triglyceride biosynthetic process (BP)                     | 8  | 718 | 33  | 34208 | 3,16E-07 | 7,30E-06 | SLC25A1,FASN,HSD17B12,ACSL4,TECR,ACSL3,ELOVL5,ACSL5                                                                                                                                                                                             |
| GO:0006890 | retrograde vesicle-mediated transport, Golgi to ER (BP)    | 7  | 718 | 24  | 34208 | 4,42E-07 | 1,00E-05 | TMED10,ARCN1,COPA,COPB1,COPB2,RAB6B,RAB6A                                                                                                                                                                                                       |
| GO:0055085 | transmembrane transport (BP)                               | 34 | 718 | 630 | 34208 | 6,76E-07 | 1,51E-05 | SLC25A1,SLC25A4,ATP2A2,NUP210,PRKACA,SLC2A1,SLC1A5,ATP6V0D1,SLC38A2,SLC3A2,PRKACB,ITPR2,SLC16A1,SLC25A10,PRKAR2A,ATP6V1A,NUP160,SLC25A6,SLC25A22,NUP205,ATP1A1,GNAS,NUP93,ITPR3,HK2,VDAC2,ABCD3,NUP85,TFRC,VDAC1,SLC25A13,SLC25A5,SLC38A1,ABCC1 |
| GO:0016192 | vesicle-mediated transport (BP)                            | 17 | 718 | 192 | 34208 | 7,25E-07 | 1,60E-05 | SEC16A,ARCN1,ARF4,VPS4A,COPA,SPTBN2,AP1B1,AP1G1,PRES,SEC13,CLTC,COPB1,COPB2,MYO5B,AP2B1,RAB6B,RAB6A                                                                                                                                             |
| GO:0030049 | muscle filament sliding (BP)                               | 8  | 718 | 37  | 34208 | 8,17E-07 | 1,78E-05 | ACTC1,TPM4,MYL6B,TPM1,VIM,MYL6,TPM3,ACTA1                                                                                                                                                                                                       |
| GO:0042273 | ribosomal large subunit biogenesis (BP)                    | 5  | 718 | 10  | 34208 | 9,28E-07 | 1,99E-05 | RPL5,RPL11,RPL7,RPL14,RPL35A                                                                                                                                                                                                                    |
| GO:0000086 | G2/M transition of mitotic cell cycle (BP)                 | 13 | 718 | 115 | 34208 | 9,46E-07 | 2,00E-05 | TUBA1A,DYNC1H1,NES,TUBB,TUBA4A,YWHAZ,CDK1,HSP90AA1,PRKACA,KHDRBS1,TUBB2C,DYNLL1,PPP2R1A                                                                                                                                                         |
| GO:0051085 | chaperone mediated protein folding requiring cofactor (BP) | 5  | 718 | 11  | 34208 | 1,67E-06 | 3,48E-05 | HSPA8,C9orf167,HSPH1,ERO1L,TOR3A                                                                                                                                                                                                                |
| GO:0006094 | gluconeogenesis (BP)                                       | 8  | 718 | 42  | 34208 | 2,28E-06 | 4,68E-05 | SLC25A1,ENO1,PRKACA,PRKACB,SLC25A11,SLC25A10,SLC25A13,GAPDH                                                                                                                                                                                     |
| GO:0051017 | actin filament bundle assembly (BP)                        | 6  | 718 | 20  | 34208 | 2,52E-06 | 5,12E-05 | LIMA1,MYO1B,LCP1,CALD1,ACTN1,ACTN4                                                                                                                                                                                                              |
| GO:0030168 | platelet activation (BP)                                   | 18 | 718 | 234 | 34208 | 2,65E-06 | 5,29E-05 | PPIA,TUBA4A,ATP2A2,CFL1,YWHAZ,HSPA5,GAS6,ITPR2,GNB1,CALU,FLNA,GNAS,ITPR3,ACTN1,GNAI2,LCK,ACTN4,GNAI1                                                                                                                                            |
| GO:0000028 | ribosomal small subunit assembly (BP)                      | 4  | 718 | 6   | 34208 | 2,79E-06 | 5,51E-05 | RPS14,RPS25,RPSA,RPS6                                                                                                                                                                                                                           |

**SUPPLEMENTARY INFORMATION: The role of glycosyltransferase enzyme GCNT3 in colon and ovarian cancer prognosis and chemoresistance**

|            |                                                         |    |     |     |       |          |          |                                                                                                                           |
|------------|---------------------------------------------------------|----|-----|-----|-------|----------|----------|---------------------------------------------------------------------------------------------------------------------------|
| GO:0030036 | actin cytoskeleton organization (BP)                    | 13 | 718 | 128 | 34208 | 3,19E-06 | 6,22E-05 | FLNB,MYH10,CFL1,CAPZA1,DYNLL1,ARPC1A,CORO1C,CA PZB,INF2,CAPZA2,ARPC5,SSH2,CORO1B                                          |
| GO:0007173 | epidermal growth factor receptor signaling pathway (BP) | 10 | 718 | 76  | 34208 | 4,27E-06 | 8,22E-05 | UBB,CDK1,ARF4,UBA52,UBC,CLTC,EP8,AP2B1,AP2A1,VI L1                                                                        |
| GO:0048205 | COPI coating of Golgi vesicle (BP)                      | 5  | 718 | 13  | 34208 | 4,50E-06 | 8,54E-05 | TMED10,ARC1N1,COPA,COPB1,COPB2                                                                                            |
| GO:0000380 | alternative nuclear mRNA splicing, via spliceosome (BP) | 4  | 718 | 7   | 34208 | 6,41E-06 | 1,19E-04 | PTBP1,HNRNPM,SFPQ,HNRNPA1                                                                                                 |
| GO:0042026 | protein refolding (BP)                                  | 4  | 718 | 7   | 34208 | 6,41E-06 | 1,19E-04 | HSP90AA1,HSPD1,CCT7,HSPA1A                                                                                                |
| GO:0071377 | cellular response to glucagon stimulus (BP)             | 7  | 718 | 37  | 34208 | 1,04E-05 | 1,90E-04 | PRKACA,PRKACB,GNB1,PRKAR2A,GNAS,GNB4,GNB2                                                                                 |
| GO:0009615 | response to virus (BP)                                  | 13 | 718 | 144 | 34208 | 1,17E-05 | 2,11E-04 | PSMA2,EEF1G,CFL1,PCBP2,HSPB1,ENO1,CCT5,DNAJC3,A CTA2,BANF1,HNRNPUL1,RPS15A,ABCE1                                          |
| GO:0019047 | provirus integration (BP)                               | 4  | 718 | 8   | 34208 | 1,26E-05 | 2,25E-04 | XRCC6,PPIA,XRCC5,BANF1                                                                                                    |
| GO:0006662 | glycerol ether metabolic process (BP)                   | 5  | 718 | 16  | 34208 | 1,45E-05 | 2,56E-04 | TMX3,PDIA6,P4HB,PDIA3,PDIA4                                                                                               |
| GO:0006464 | protein modification process (BP)                       | 13 | 718 | 150 | 34208 | 1,81E-05 | 3,16E-04 | RPN2,PCMT1,UBA52,PCMTD1,UBR5,PCMTD2,ARAF,PAM ,HECTD3,HERC1,RPN1,ERO1L,PLOD3                                               |
| GO:0045454 | cell redox homeostasis (BP)                             | 8  | 718 | 55  | 34208 | 1,85E-05 | 3,19E-04 | TMX3,TXNDC12,PDIA6,P4HB,PDIA3,AIFM1,QSOX2,PDIA4                                                                           |
| GO:0034329 | cell junction assembly (BP)                             | 10 | 718 | 90  | 34208 | 1,97E-05 | 3,36E-04 | PLEC,MLLT4,JUP,ACTG1,FLNA,ITGB4,CTNND1,ACTN1,CT NNA1,ITGB1                                                                |
| GO:0006396 | RNA processing (BP)                                     | 10 | 718 | 92  | 34208 | 2,39E-05 | 3,98E-04 | HNRNPD,HNRNPK,HNRNPF,DDX17,PABPC4,HNRNPU,PR PF39,HNRNPUL1,HNRNPH1,SYNCRIP                                                 |
| GO:0006916 | anti-apoptosis (BP)                                     | 15 | 718 | 200 | 34208 | 2,39E-05 | 4,02E-04 | NPM1,UBB,CDK1,CFL1,HSPB1,UBA52,YWHAZ,HSPA5,UB C,HSPA9,PRDX2,MYO18A,SQSTM1,HSPA1A,HSP90B1                                  |
| GO:0008645 | hexose transport (BP)                                   | 7  | 718 | 42  | 34208 | 2,48E-05 | 4,09E-04 | NUP210,SLC2A1,NUP160,NUP205,NUP93,HK2,NUP85                                                                               |
| GO:0006950 | response to stress (BP)                                 | 13 | 718 | 155 | 34208 | 2,57E-05 | 4,19E-04 | NPM1,HSPB1,HSP90AA1,HSPA6,HSPD1,HSPA8,HYOU1,H SPH1,HSP90AB1,SQSTM1,HSPA1A,HSP90B1,SERPINH1                                |
| GO:0007017 | microtubule-based process (BP)                          | 5  | 718 | 18  | 34208 | 2,74E-05 | 4,42E-04 | TUBA1C,TUBA1A,TUBB,DYNLL2,DYNLL1                                                                                          |
| GO:0001701 | in utero embryonic development (BP)                     | 14 | 718 | 179 | 34208 | 2,78E-05 | 4,44E-04 | MYH10,RDH10,CSDA,SRSF1,MYH9,CTNNB1,TPM1,MSH2, RCN1,MYO1E,YBX1,PRMT1,PLOD3,ITGB1                                           |
| GO:0007411 | axon guidance (BP)                                      | 19 | 718 | 307 | 34208 | 3,14E-05 | 4,86E-04 | MYH14,MYH10,CDK1,CFL1,HSP90AA1,SPTAN1,MYL12B, SPTBN2,MYH9,ACTG1,CLTC,ABLIM1,MYL6,AP2B1,SPTBN 1,TUBB3,HSP90AB1,AP2A1,ITGB1 |
| GO:0006302 | double-strand break repair (BP)                         | 8  | 718 | 59  | 34208 | 3,13E-05 | 4,88E-04 | XRCC6,PRKDC,MSH2,H2AFX,XRCC5,TRIP13,MRE11A,AT M                                                                           |
| GO:0006406 | mRNA export from nucleus (BP)                           | 8  | 718 | 59  | 34208 | 3,13E-05 | 4,88E-04 | SRSF3,SRSF7,SRSF1,EIF5A,NUP160,THOC4,DDX39A,UPF1                                                                          |
| GO:0055015 | ventricular cardiac muscle cell development (BP)        | 4  | 718 | 10  | 34208 | 3,65E-05 | 5,54E-04 | FHL2,MYH10,CDK1,LMNA                                                                                                      |

**SUPPLEMENTARY INFORMATION: The role of glycosyltransferase enzyme GCNT3 in colon and ovarian cancer prognosis and chemoresistance**

|            |                                                                                |    |     |     |       |          |          |                                                                     |
|------------|--------------------------------------------------------------------------------|----|-----|-----|-------|----------|----------|---------------------------------------------------------------------|
| GO:0006610 | ribosomal protein import into nucleus (BP)                                     | 3  | 718 | 4   | 34208 | 3,63E-05 | 5,55E-04 | KPNB1,RPL23,IPO5                                                    |
| GO:0002576 | platelet degranulation (BP)                                                    | 9  | 718 | 79  | 34208 | 4,18E-05 | 6,27E-04 | PPIA,TUBA4A,CFL1,HSPA5,GAS6,CALU,FLNA,ACTN1,ACTN4                   |
| GO:0034332 | adherens junction organization (BP)                                            | 6  | 718 | 33  | 34208 | 5,72E-05 | 8,41E-04 | DSP,MLLT4,JUP,ACTG1,CTNND1,CTNNA1                                   |
| GO:0042059 | negative regulation of epidermal growth factor receptor signaling pathway (BP) | 6  | 718 | 33  | 34208 | 5,72E-05 | 8,41E-04 | UBB,UBA52,UBC,CLTC,AP2B1,AP2A1                                      |
| GO:0006090 | pyruvate metabolic process (BP)                                                | 5  | 718 | 21  | 34208 | 6,18E-05 | 9,01E-04 | LDHB,PDHB,SLC16A1,PDHA1,BSG                                         |
| GO:0060048 | cardiac muscle contraction (BP)                                                | 5  | 718 | 22  | 34208 | 7,86E-05 | 1,13E-03 | ACTC1,SRSF1,TPM1,GAA,CAMK2D                                         |
| GO:0000723 | telomere maintenance (BP)                                                      | 7  | 718 | 50  | 34208 | 7,95E-05 | 1,14E-03 | PARP1,XRCC6,POLD4,HIST3H3,PRKDC,RFC5,XRCC5                          |
| GO:0006511 | ubiquitin-dependent protein catabolic process (BP)                             | 12 | 718 | 150 | 34208 | 8,25E-05 | 1,17E-03 | PSMA2,PSMC2,PSMA7,CUL2,UBR2,UBR5,TCEB1,SKP1,CUL5,SQSTM1,PSMA4,CUL4A |
| GO:0019059 | initiation of viral infection (BP)                                             | 4  | 718 | 12  | 34208 | 8,33E-05 | 1,17E-03 | XRCC6,PPIA,XRCC5,BANF1                                              |
| GO:0030705 | cytoskeleton-dependent intracellular transport (BP)                            | 3  | 718 | 5   | 34208 | 8,92E-05 | 1,21E-03 | TUBA1C,TUBA1A,TUBB                                                  |
| GO:0071681 | cellular response to indole-3-methanol (BP)                                    | 3  | 718 | 5   | 34208 | 8,92E-05 | 1,21E-03 | CTNNB1,JUP,CTNNA1                                                   |
| GO:0071229 | cellular response to acid (BP)                                                 | 3  | 718 | 5   | 34208 | 8,92E-05 | 1,21E-03 | ANXA2,S100A10,HIST1H2BA                                             |
| GO:0033119 | negative regulation of RNA splicing (BP)                                       | 3  | 718 | 5   | 34208 | 8,92E-05 | 1,21E-03 | RPS26,RPS13,PTBP1                                                   |
| GO:0006754 | ATP biosynthetic process (BP)                                                  | 6  | 718 | 37  | 34208 | 1,12E-04 | 1,50E-03 | ATP5B,ATP2A2,ATP5C1,ATP1A1,ATP5A1,SLC25A13                          |
| GO:0007018 | microtubule-based movement (BP)                                                | 9  | 718 | 90  | 34208 | 1,17E-04 | 1,55E-03 | TUBA1C,TUBA1A,DYNC1H1,TUBB,TUBA4A,TUBB2B,TUBB2A,TUBB2C,TUBB3        |
| GO:0016337 | cell-cell adhesion (BP)                                                        | 8  | 718 | 74  | 34208 | 1,61E-04 | 2,12E-03 | DSP,MYH9,SCRIB,CTNNB1,JUP,CTNND1,CYFIP2,FAT1                        |
| GO:0016584 | nucleosome positioning (BP)                                                    | 3  | 718 | 6   | 34208 | 1,76E-04 | 2,25E-03 | HIST1H1E,HIST1H1C,HIST1H1D                                          |
| GO:0047497 | mitochondrion transport along microtubule (BP)                                 | 3  | 718 | 6   | 34208 | 1,76E-04 | 2,25E-03 | RHOT1,LRPPRC,MAP1B                                                  |
| GO:0051099 | positive regulation of binding (BP)                                            | 3  | 718 | 6   | 34208 | 1,76E-04 | 2,25E-03 | ANXA2,S100A10,HIST1H2BA                                             |

**SUPPLEMENTARY INFORMATION: The role of glycosyltransferase enzyme GCNT3 in colon and ovarian cancer prognosis and chemoresistance**

|            |                                                                 |    |     |     |       |          |          |                                                                                               |
|------------|-----------------------------------------------------------------|----|-----|-----|-------|----------|----------|-----------------------------------------------------------------------------------------------|
| GO:0006099 | tricarboxylic acid cycle (BP)                                   | 5  | 718 | 26  | 34208 | 1,83E-04 | 2,33E-03 | PDHB,OGDH,SUCLA2,DLST,SDHA                                                                    |
| GO:0048011 | nerve growth factor receptor signaling pathway (BP)             | 14 | 718 | 215 | 34208 | 1,99E-04 | 2,51E-03 | YWHAE,UBB,CDK1,PRKACA,UBA52,UBC,PRKACB,ITPR2,C LTC,PRKAR2A,AP2B1,ITPR3,SQSTM1,AP2A1           |
| GO:0009725 | response to hormone stimulus (BP)                               | 7  | 718 | 58  | 34208 | 2,07E-04 | 2,59E-03 | FHL2,ACADM,BDH1,CTNNB1,MMS19,MAT2A,RBM14                                                      |
| GO:0051603 | proteolysis involved in cellular protein catabolic process (BP) | 5  | 718 | 27  | 34208 | 2,21E-04 | 2,74E-03 | PSMA2,PSMA7,HSPA5,DNAJC3,PSMA4                                                                |
| GO:0043066 | negative regulation of apoptotic process (BP)                   | 16 | 718 | 272 | 34208 | 2,31E-04 | 2,84E-03 | FHL2,NES,KRT18,HSPB1,CSDA,TMEM161A,HSPA5,DNAJA 3,GAS6,HSPD1,CTNNB1,ARAF,CTNNA1,XRCC5,ATM,RPS6 |
| GO:0017148 | negative regulation of translation (BP)                         | 5  | 718 | 28  | 34208 | 2,65E-04 | 3,20E-03 | CAPRIN1,GNB2L1,IGF2BP1,CALR,IGF2BP3                                                           |
| GO:0050690 | regulation of defense response to virus by virus (BP)           | 5  | 718 | 28  | 34208 | 2,65E-04 | 3,20E-03 | AP1B1,AP1G1,AP2B1,AP2A1,LCK                                                                   |
| GO:0015758 | glucose transport (BP)                                          | 7  | 718 | 61  | 34208 | 2,84E-04 | 3,41E-03 | NUP210,SLC2A1,NUP160,NUP205,NUP93,HK2,NUP85                                                   |
| GO:0006369 | termination of RNA polymerase II transcription (BP)             | 6  | 718 | 44  | 34208 | 3,00E-04 | 3,57E-03 | SRSF3,SNRPE,SRSF7,SRSF1,SNRPF,THOC4                                                           |
| GO:0006611 | protein export from nucleus (BP)                                | 4  | 718 | 17  | 34208 | 3,68E-04 | 4,32E-03 | EIF5A,HSPA9,XPO5,CALR                                                                         |
| GO:0046688 | response to copper ion (BP)                                     | 4  | 718 | 17  | 34208 | 3,68E-04 | 4,32E-03 | ACADM,CDK1,PAM,TFRC                                                                           |
| GO:0045905 | positive regulation of translational termination (BP)           | 2  | 718 | 2   | 34208 | 4,40E-04 | 5,00E-03 | EIF5A2,EIF5A                                                                                  |
| GO:0006452 | translational frameshifting (BP)                                | 2  | 718 | 2   | 34208 | 4,40E-04 | 5,00E-03 | EIF5A2,EIF5A                                                                                  |
| GO:0045901 | positive regulation of translational elongation (BP)            | 2  | 718 | 2   | 34208 | 4,40E-04 | 5,00E-03 | EIF5A2,EIF5A                                                                                  |
| GO:0010827 | regulation of glucose transport (BP)                            | 5  | 718 | 31  | 34208 | 4,34E-04 | 5,05E-03 | NUP210,NUP160,NUP205,NUP93,NUP85                                                              |
| GO:0006310 | DNA recombination (BP)                                          | 8  | 718 | 86  | 34208 | 4,56E-04 | 5,10E-03 | RUVBL2,SMC1A,NONO,RUVBL1,H2AFX,XRCC5,SFPQ,RB M14                                              |
| GO:0022904 | respiratory electron transport chain (BP)                       | 8  | 718 | 86  | 34208 | 4,56E-04 | 5,10E-03 | ATP5B,UQCRC2,ATP5C1,NDUFA4,ATP5A1,SDHA,ETFA,C OX5A                                            |
| GO:0019433 | triglyceride catabolic process (BP)                             | 4  | 718 | 18  | 34208 | 4,66E-04 | 5,14E-03 | PPP1CA,PRKACA,PRKACB,PPP1CB                                                                   |
| GO:0034504 | protein localization to nucleus (BP)                            | 4  | 718 | 18  | 34208 | 4,66E-04 | 5,14E-03 | RPL11,LMNA,CALR,XPO1                                                                          |

**SUPPLEMENTARY INFORMATION: The role of glycosyltransferase enzyme GCNT3 in colon and ovarian cancer prognosis and chemoresistance**

|            |                                                                                               |    |     |     |       |          |          |                                                                                               |
|------------|-----------------------------------------------------------------------------------------------|----|-----|-----|-------|----------|----------|-----------------------------------------------------------------------------------------------|
| GO:0006554 | lysine catabolic process (BP)                                                                 | 3  | 718 | 8   | 34208 | 4,77E-04 | 5,22E-03 | OGDH,DLST,GCDH                                                                                |
| GO:0030433 | ER-associated protein catabolic process (BP)                                                  | 5  | 718 | 32  | 34208 | 5,06E-04 | 5,50E-03 | HSPA5,SEC61B,OS9,HSP90B1,ERLEC1                                                               |
| GO:0006461 | protein complex assembly (BP)                                                                 | 9  | 718 | 111 | 34208 | 5,67E-04 | 6,12E-03 | DARS,CDK1,CAPZA1,SF3B3,PPP2R1A,TCEB2,EPRS,CAPZA2,VIL1                                         |
| GO:0006486 | protein glycosylation (BP)                                                                    | 7  | 718 | 70  | 34208 | 6,65E-04 | 7,12E-03 | UGGT2,STT3B,STT3A,DDOST,UGGT1,ALG1,RPN1                                                       |
| GO:0006119 | oxidative phosphorylation (BP)                                                                | 3  | 718 | 9   | 34208 | 7,04E-04 | 7,49E-03 | UQCRC2,ATP5C1,MSH2                                                                            |
| GO:0007016 | cytoskeletal anchoring at plasma membrane (BP)                                                | 3  | 718 | 10  | 34208 | 9,90E-04 | 1,04E-02 | FLNB,CTNNB1,JUP                                                                               |
| GO:0048025 | negative regulation of nuclear mRNA splicing, via spliceosome (BP)                            | 3  | 718 | 10  | 34208 | 9,90E-04 | 1,04E-02 | RBMX,SRSF7,PTBP1                                                                              |
| GO:0008283 | cell proliferation (BP)                                                                       | 16 | 718 | 312 | 34208 | 1,02E-03 | 1,07E-02 | SRA1,MYH10,PRDX1,KHDRBS1,CSE1L,GAS6,SCRIB,CDC16,UBR5,GNB1,EPS8,XRCC5,CUL5,RPS27,MRE11A,RPL23A |
| GO:0034660 | ncRNA metabolic process (BP)                                                                  | 4  | 718 | 22  | 34208 | 1,04E-03 | 1,08E-02 | SNRPE,GEMIN4,SNRPF,SNRPD1                                                                     |
| GO:0000289 | nuclear-transcribed mRNA poly(A) tail shortening (BP)                                         | 4  | 718 | 23  | 34208 | 1,24E-03 | 1,27E-02 | TNKS1BP1,CNOT1,PABPC1,EIF4A1                                                                  |
| GO:0000462 | maturation of SSU-rRNA from tricistronic rRNA transcript (SSU-rRNA, 5.8S rRNA, LSU-rRNA) (BP) | 2  | 718 | 3   | 34208 | 1,30E-03 | 1,28E-02 | RPS24,RPS8                                                                                    |
| GO:0006189 | 'de novo' IMP biosynthetic process (BP)                                                       | 2  | 718 | 3   | 34208 | 1,30E-03 | 1,28E-02 | GART,PAICS                                                                                    |
| GO:0009991 | response to extracellular stimulus (BP)                                                       | 2  | 718 | 3   | 34208 | 1,30E-03 | 1,28E-02 | RPS19,ACTA1                                                                                   |
| GO:0051208 | sequestering of calcium ion (BP)                                                              | 2  | 718 | 3   | 34208 | 1,30E-03 | 1,28E-02 | CALR,HSP90B1                                                                                  |
| GO:0003136 | negative regulation of heart induction by canonical Wnt receptor signaling pathway (BP)       | 2  | 718 | 3   | 34208 | 1,30E-03 | 1,28E-02 | CTNNB1,JUP                                                                                    |
| GO:0006420 | arginyl-tRNA aminoacylation (BP)                                                              | 2  | 718 | 3   | 34208 | 1,30E-03 | 1,28E-02 | RARS2,RARS                                                                                    |
| GO:0019673 | GDP-mannose metabolic process (BP)                                                            | 2  | 718 | 3   | 34208 | 1,30E-03 | 1,28E-02 | DPM1,GMDS                                                                                     |
| GO:0048208 | COPII vesicle coating (BP)                                                                    | 3  | 718 | 11  | 34208 | 1,34E-03 | 1,29E-02 | TMED10,PRES,SEC13                                                                             |



**SUPPLEMENTARY INFORMATION: The role of glycosyltransferase enzyme GCNT3 in colon and ovarian cancer prognosis and chemoresistance**

|            |                                                               |    |     |     |       |          |          |                                                          |
|------------|---------------------------------------------------------------|----|-----|-----|-------|----------|----------|----------------------------------------------------------|
| GO:0006303 | double-strand break repair via nonhomologous end joining (BP) | 3  | 718 | 11  | 34208 | 1,34E-03 | 1,29E-02 | XRCC6,PRKDC,XRCC5                                        |
| GO:0042149 | cellular response to glucose starvation (BP)                  | 3  | 718 | 11  | 34208 | 1,34E-03 | 1,29E-02 | SLC2A1,HSPA5,MYBBP1A                                     |
| GO:0006184 | GTP catabolic process (BP)                                    | 10 | 718 | 151 | 34208 | 1,38E-03 | 1,32E-02 | ARF4,GNB1,GNAS,EFTUD2,GNAI2,RAB6B,RAB8B,RAB6A,GNAI1,GNB2 |
| GO:0030163 | protein catabolic process (BP)                                | 5  | 718 | 41  | 34208 | 1,61E-03 | 1,53E-02 | PSMC2,PSMC5,CUL2,UBR2,PSMC3                              |
| GO:0007050 | cell cycle arrest (BP)                                        | 9  | 718 | 129 | 34208 | 1,65E-03 | 1,56E-02 | KHDRBS1,CUL2,GAS2L3,MSH2,CALR,CUL5,ATM,MACF1,CUL4A       |
| GO:0050900 | leukocyte migration (BP)                                      | 8  | 718 | 106 | 34208 | 1,80E-03 | 1,69E-02 | PPIA,GAS6,MYH9,SLC3A2,SLC16A1,LCK,BSG,ITGB1              |
| GO:0008629 | induction of apoptosis by intracellular signals (BP)          | 5  | 718 | 43  | 34208 | 2,00E-03 | 1,84E-02 | DYNLL2,CUL2,DYNLL1,CUL5,CUL4A                            |
| GO:0006913 | nucleocytoplasmic transport (BP)                              | 4  | 718 | 26  | 34208 | 1,99E-03 | 1,84E-02 | NPM1,EIF5A,MYBBP1A,NUP205                                |
| GO:0000387 | spliceosomal snRNP assembly (BP)                              | 4  | 718 | 26  | 34208 | 1,99E-03 | 1,84E-02 | SNRPE,GEMIN4,SNRPF,SNRPD1                                |
| GO:0042776 | mitochondrial ATP synthesis coupled proton transport (BP)     | 3  | 718 | 13  | 34208 | 2,25E-03 | 2,05E-02 | ATP5B,ATP5C1,ATP5A1                                      |
| GO:0015986 | ATP synthesis coupled proton transport (BP)                   | 3  | 718 | 13  | 34208 | 2,25E-03 | 2,05E-02 | ATP5B,ATP5C1,ATP5A1                                      |
| GO:0007569 | cell aging (BP)                                               | 4  | 718 | 27  | 34208 | 2,30E-03 | 2,07E-02 | NPM1,CDK1,DNAJA3,HSD17B10                                |
| GO:0048678 | response to axon injury (BP)                                  | 4  | 718 | 27  | 34208 | 2,30E-03 | 2,07E-02 | CDK1,ARF4,LGALS1,MAP1B                                   |
| GO:0006564 | L-serine biosynthetic process (BP)                            | 2  | 718 | 4   | 34208 | 2,57E-03 | 2,18E-02 | PHGDH,SHMT2                                              |
| GO:0015853 | adenine transport (BP)                                        | 2  | 718 | 4   | 34208 | 2,57E-03 | 2,18E-02 | SLC25A4,SLC25A5                                          |
| GO:0051014 | actin filament severing (BP)                                  | 2  | 718 | 4   | 34208 | 2,57E-03 | 2,18E-02 | DSTN,VIL1                                                |
| GO:0045040 | protein import into mitochondrial outer membrane (BP)         | 2  | 718 | 4   | 34208 | 2,57E-03 | 2,18E-02 | HSP90AA1,SAMM50                                          |
| GO:0009156 | ribonucleoside monophosphate biosynthetic process (BP)        | 2  | 718 | 4   | 34208 | 2,57E-03 | 2,18E-02 | PRPS1,PRPS2                                              |
| GO:0044249 | cellular biosynthetic process (BP)                            | 2  | 718 | 4   | 34208 | 2,57E-03 | 2,18E-02 | PRPS1,PRPS2                                              |
| GO:0006172 | ADP biosynthetic process (BP)                                 | 2  | 718 | 4   | 34208 | 2,57E-03 | 2,18E-02 | ATP5B,ATP5A1                                             |
| GO:0046796 | viral genome transport in host cell (BP)                      | 2  | 718 | 4   | 34208 | 2,57E-03 | 2,18E-02 | KPNB1,XPO1                                               |

**SUPPLEMENTARY INFORMATION: The role of glycosyltransferase enzyme GCNT3 in colon and ovarian cancer prognosis and chemoresistance**

|            |                                                                                       |    |     |     |       |          |          |                                                                                     |
|------------|---------------------------------------------------------------------------------------|----|-----|-----|-------|----------|----------|-------------------------------------------------------------------------------------|
| GO:0006518 | peptide metabolic process (BP)                                                        | 2  | 718 | 4   | 34208 | 2,57E-03 | 2,18E-02 | MME,PAM                                                                             |
| GO:0008612 | peptidyl-lysine modification to hypusine (BP)                                         | 2  | 718 | 4   | 34208 | 2,57E-03 | 2,18E-02 | EIF5A2,EIF5A                                                                        |
| GO:0007584 | response to nutrient (BP)                                                             | 7  | 718 | 89  | 34208 | 2,72E-03 | 2,29E-02 | ACADM,ACSL4,BDH1,ACSL3,GNAI2,ACSL5,TFRC                                             |
| GO:0042176 | regulation of protein catabolic process (BP)                                          | 3  | 718 | 14  | 34208 | 2,82E-03 | 2,35E-02 | XPO1,PSMD2,PSMD3                                                                    |
| GO:0009306 | protein secretion (BP)                                                                | 3  | 718 | 14  | 34208 | 2,82E-03 | 2,35E-02 | GNAS,CANX,PDIA4                                                                     |
| GO:0016197 | endosome transport (BP)                                                               | 5  | 718 | 47  | 34208 | 2,98E-03 | 2,47E-02 | UBB,VPS4A,UBA52,UBC,SQSTM1                                                          |
| GO:0006635 | fatty acid beta-oxidation (BP)                                                        | 4  | 718 | 29  | 34208 | 3,01E-03 | 2,48E-02 | ACADM,CPT1A,HADHB,HADHA                                                             |
| GO:0051289 | protein homotetramerization (BP)                                                      | 5  | 718 | 48  | 34208 | 3,26E-03 | 2,68E-02 | ACADM,PFKP,SHMT2,HSD17B10,PFKL                                                      |
| GO:0032480 | negative regulation of type I interferon production (BP)                              | 4  | 718 | 30  | 34208 | 3,42E-03 | 2,76E-02 | UBB,PCBP2,UBA52,UBC                                                                 |
| GO:0033077 | T cell differentiation in thymus (BP)                                                 | 4  | 718 | 30  | 34208 | 3,42E-03 | 2,76E-02 | DNAJA3,PRKDC,CTNNB1,RPS6                                                            |
| GO:0033572 | transferrin transport (BP)                                                            | 4  | 718 | 30  | 34208 | 3,42E-03 | 2,76E-02 | ATP6V0D1,CLTC,ATP6V1A,TFRC                                                          |
| GO:0045333 | cellular respiration (BP)                                                             | 3  | 718 | 15  | 34208 | 3,47E-03 | 2,78E-02 | FASTKD3,FASTKD5,SLC25A13                                                            |
| GO:0006919 | activation of cysteine-type endopeptidase activity involved in apoptotic process (BP) | 6  | 718 | 71  | 34208 | 3,78E-03 | 3,01E-02 | PDCD6,DNAJA3,HSPD1,AIFM1,RPS3,LCK                                                   |
| GO:0015992 | proton transport (BP)                                                                 | 5  | 718 | 50  | 34208 | 3,90E-03 | 3,10E-02 | ATP5B,ATP6V0D1,ATP5C1,ATP6V1A,ATP5A1                                                |
| GO:0006366 | transcription from RNA polymerase II promoter (BP)                                    | 14 | 718 | 294 | 34208 | 4,00E-03 | 3,16E-02 | PARP1,PSMC5,SRSF3,SNRPE,RBMX,SRSF7,SRSF1,SNRPF,TCEB1,TCEB2,THOC4,YBX1,TRIP13,TRIM29 |
| GO:0055114 | oxidation-reduction process (BP)                                                      | 12 | 718 | 233 | 34208 | 4,02E-03 | 3,16E-02 | ACADM,HADHB,OGDH,PHGDH,PDHA1,PAM,FAR1,DHCR7,SDHA,ERO1L,QSOX2,ETFA                   |
| GO:0030240 | skeletal muscle thin filament assembly (BP)                                           | 2  | 718 | 5   | 34208 | 4,22E-03 | 3,18E-02 | ACTC1,ACTA1                                                                         |
| GO:0051096 | positive regulation of helicase activity (BP)                                         | 2  | 718 | 5   | 34208 | 4,22E-03 | 3,18E-02 | SSBP1,MSH2                                                                          |
| GO:0005981 | regulation of glycogen catabolic process (BP)                                         | 2  | 718 | 5   | 34208 | 4,22E-03 | 3,18E-02 | PPP1CA,PPP1CB                                                                       |
| GO:0009113 | purine base biosynthetic process (BP)                                                 | 2  | 718 | 5   | 34208 | 4,22E-03 | 3,18E-02 | GART,PAICS                                                                          |
| GO:0050847 | progesterone receptor signaling pathway (BP)                                          | 2  | 718 | 5   | 34208 | 4,22E-03 | 3,18E-02 | PHB,UBR5                                                                            |

**SUPPLEMENTARY INFORMATION: The role of glycosyltransferase enzyme GCNT3 in colon and ovarian cancer prognosis and chemoresistance**

|            |                                                                       |    |     |     |       |          |          |                                                                                               |
|------------|-----------------------------------------------------------------------|----|-----|-----|-------|----------|----------|-----------------------------------------------------------------------------------------------|
| GO:0002026 | regulation of the force of heart contraction (BP)                     | 3  | 718 | 16  | 34208 | 4,20E-03 | 3,25E-02 | ATP2A2,ATP1A1,GAA                                                                             |
| GO:0034199 | activation of protein kinase A activity (BP)                          | 3  | 718 | 16  | 34208 | 4,20E-03 | 3,25E-02 | PRKACA,PRKACB,PRKAR2A                                                                         |
| GO:0006509 | membrane protein ectodomain proteolysis (BP)                          | 3  | 718 | 16  | 34208 | 4,20E-03 | 3,25E-02 | RBMX,MYH9,ERAP1                                                                               |
| GO:0015991 | ATP hydrolysis coupled proton transport (BP)                          | 4  | 718 | 32  | 34208 | 4,34E-03 | 3,25E-02 | ATP5B,ATP6V0D1,ATP6V1A,ATP5A1                                                                 |
| GO:0008284 | positive regulation of cell proliferation (BP)                        | 16 | 718 | 361 | 34208 | 4,38E-03 | 3,27E-02 | EPCAM,LRP5,RPS9,RPS4X,EIF5A2,DNAJA2,CNBP,EIF5A,NAP1L1,CALR,GNAI2,SHMT2,SSR1,TNS3,RPS15A,ITGB1 |
| GO:0043065 | positive regulation of apoptotic process (BP)                         | 10 | 718 | 178 | 34208 | 4,55E-03 | 3,38E-02 | PDIA3,DNAJA3,HSPD1,PRKDC,GNB2L1,SCRIB,CTNBN1,ATM,RPS6,ITGB1                                   |
| GO:0007420 | brain development (BP)                                                | 10 | 718 | 179 | 34208 | 4,74E-03 | 3,50E-02 | NES,MYH10,ARF4,ATP6V0D1,PRKDC,BDH1,GPR56,PHGDH,ACSL3,ATM                                      |
| GO:0031124 | mRNA 3'-end processing (BP)                                           | 4  | 718 | 33  | 34208 | 4,86E-03 | 3,57E-02 | SRSF3,SRSF7,SRSF1,THOC4                                                                       |
| GO:0000381 | regulation of alternative nuclear mRNA splicing, via spliceosome (BP) | 3  | 718 | 17  | 34208 | 5,03E-03 | 3,63E-02 | RBMX,PTBP1,DDX5                                                                               |
| GO:0006260 | DNA replication (BP)                                                  | 9  | 718 | 152 | 34208 | 4,96E-03 | 3,63E-02 | POLD4,PHB,CDK1,SSBP1,RFC5,NAP1L1,UPF1,RBM14,MC M3                                             |
| GO:0031100 | organ regeneration (BP)                                               | 5  | 718 | 53  | 34208 | 5,02E-03 | 3,64E-02 | CDK1,CSDA,LCP1,EIF4A1,CAD                                                                     |
| GO:0050821 | protein stabilization (BP)                                            | 5  | 718 | 53  | 34208 | 5,02E-03 | 3,64E-02 | DNAJA3,HSPD1,FLNA,CALR,GAPDH                                                                  |
| GO:0008219 | cell death (BP)                                                       | 9  | 718 | 156 | 34208 | 5,86E-03 | 4,20E-02 | GARS,HSPB1,SPTBN2,DNAJA3,HSPD1,NOP56,FUS,ATM,ATXN10                                           |
| GO:0006401 | RNA catabolic process (BP)                                            | 3  | 718 | 18  | 34208 | 5,94E-03 | 4,22E-02 | HNRNPD,PABPC4,ABCE1                                                                           |
| GO:0006164 | purine nucleotide biosynthetic process (BP)                           | 3  | 718 | 18  | 34208 | 5,94E-03 | 4,22E-02 | GART,PRPS1,PAICS                                                                              |
| GO:0070588 | calcium ion transmembrane transport (BP)                              | 4  | 718 | 35  | 34208 | 6,01E-03 | 4,23E-02 | ATP2A2,ITPR2,ITPR3,CUL5                                                                       |
| GO:0006606 | protein import into nucleus (BP)                                      | 4  | 718 | 35  | 34208 | 6,01E-03 | 4,23E-02 | KPNB1,IPO7,PDIA3,IPO9                                                                         |
| GO:0014075 | response to amine stimulus (BP)                                       | 2  | 718 | 6   | 34208 | 6,24E-03 | 4,23E-02 | CDK1,CAD                                                                                      |
| GO:0051271 | negative regulation of cellular component                             | 2  | 718 | 6   | 34208 | 6,24E-03 | 4,23E-02 | ACTN1,ACTN4                                                                                   |

**SUPPLEMENTARY INFORMATION: The role of glycosyltransferase enzyme GCNT3 in colon and ovarian cancer prognosis and chemoresistance**

|            |                                                                      |    |     |     |       |          |          |                                                               |
|------------|----------------------------------------------------------------------|----|-----|-----|-------|----------|----------|---------------------------------------------------------------|
|            | movement (BP)                                                        |    |     |     |       |          |          |                                                               |
| GO:0006924 | activation-induced cell death of T cells (BP)                        | 2  | 718 | 6   | 34208 | 6,24E-03 | 4,23E-02 | DNAJA3,RPS6                                                   |
| GO:0034501 | protein localization to kinetochore (BP)                             | 2  | 718 | 6   | 34208 | 6,24E-03 | 4,23E-02 | CDK1,ZNF828                                                   |
| GO:0007270 | neuron-neuron synaptic transmission (BP)                             | 2  | 718 | 6   | 34208 | 6,24E-03 | 4,23E-02 | TMOD2,VDAC1                                                   |
| GO:0030388 | fructose 1,6-bisphosphate metabolic process (BP)                     | 2  | 718 | 6   | 34208 | 6,24E-03 | 4,23E-02 | PFKP,PFKL                                                     |
| GO:0071901 | negative regulation of protein serine/threonine kinase activity (BP) | 2  | 718 | 6   | 34208 | 6,24E-03 | 4,23E-02 | LRP5,HSPB1                                                    |
| GO:0007098 | centrosome cycle (BP)                                                | 2  | 718 | 6   | 34208 | 6,24E-03 | 4,23E-02 | NPM1,CDK1                                                     |
| GO:0006091 | generation of precursor metabolites and energy (BP)                  | 5  | 718 | 56  | 34208 | 6,35E-03 | 4,29E-02 | SLC25A3,ATP5B,SLC25A4,OGDH,DLST                               |
| GO:0007067 | mitosis (BP)                                                         | 10 | 718 | 187 | 34208 | 6,40E-03 | 4,30E-02 | TUBB,CDK1,TUBB2B,TUBB2A,CDC16,RUVBL1,CLTC,AKAP8,PPP1R12A,RPS6 |
| GO:0006833 | water transport (BP)                                                 | 4  | 718 | 36  | 34208 | 6,65E-03 | 4,46E-02 | PRKACA,PRKACB,PRKAR2A,GNAS                                    |
| GO:0016477 | cell migration (BP)                                                  | 7  | 718 | 105 | 34208 | 6,74E-03 | 4,48E-02 | CDK1,SCRIB,JUP,MYO18A,FAT1,TNS3,ITGB1                         |
| GO:0006470 | protein dephosphorylation (BP)                                       | 7  | 718 | 105 | 34208 | 6,74E-03 | 4,48E-02 | PPP1CA,PPP6C,PPP2R1A,TIMM50,SSH2,PPP1CB,PPP1R12A              |
| GO:0045214 | sarcomere organization (BP)                                          | 3  | 718 | 19  | 34208 | 6,94E-03 | 4,55E-02 | TPM1,ACTG1,ITGB1                                              |
| GO:0055007 | cardiac muscle cell differentiation (BP)                             | 3  | 718 | 19  | 34208 | 6,94E-03 | 4,55E-02 | ACADM,CALR,ITGB1                                              |
| GO:0046686 | response to cadmium ion (BP)                                         | 3  | 718 | 19  | 34208 | 6,94E-03 | 4,55E-02 | CDK1,BDH1,CTNNB1                                              |
| GO:0045216 | cell-cell junction organization (BP)                                 | 5  | 718 | 58  | 34208 | 7,36E-03 | 4,80E-02 | MLLT4,JUP,ACTG1,CTNND1,CTNNA1                                 |
